# Supplementary material
Source: publisher figshare collection journal article supplement (https://acs.figshare.com/ndownloader/files/3626664)
Supplement: Supplementary file 1 [file 3626664]

## Sheet: proteinGroups
Protein IDs	Majority protein IDs	Protein names	Gene names	Peptides	Razor + unique peptides	Unique peptides	Sequence coverage [%]	Intensity	Intensity BSA1	Intensity BSA2	Intensity BSA3	Intensity BSA4	Intensity BSA5	Intensity PA1	Intensity PA2	Intensity PA3	Intensity PA4	Intensity PA5	LFQ intensity BSA1	LFQ intensity BSA2	LFQ intensity BSA3	LFQ intensity BSA4	LFQ intensity BSA5	LFQ intensity PA1	LFQ intensity PA2	LFQ intensity PA3	LFQ intensity PA4	LFQ intensity PA5	Peptide IDs	Peptide is razor	Mod. peptide IDs	Evidence IDs	MS/MS IDs	Best MS/MS	Oxidation (M) site IDs	Oxidation (M) site positions
G5E8B8;P11276	G5E8B8;P11276	Fibronectin;Anastellin	Fn1	168	168	2	73.6	10784000000000	1655800000000	1497700000000	1510300000000	907050000000	564060000000	1401200000000	841650000000	758630000000	344660000000	1303300000000	1463100000000	1561600000000	1455500000000	1630700000000	1715700000000	1194100000000	1172300000000	1027900000000	1120000000000	1125300000000	2842;3208;3242;3610;4344;4349;4350;4412;4476;4829;4830;5088;5089;5815;6401;6906;6907;7077;7402;7521;7522;8289;8818;8854;9544;10958;11082;11652;11653;11676;11794;12455;12456;13057;13630;13631;13751;14543;14544;14879;14881;15028;15234;15678;16032;16216;16217;16736;17442;17443;17725;18101;18102;19005;19102;19244;19931;20141;21491;21790;21913;22853;22943;24937;24938;27478;27548;27925;27945;27946;2992…	True;True;True;True;True;True;True;True;True;True;True;True;True;True;True;True;True;True;True;True;True;True;True;True;True;True;True;True;True;True;True;True;True;True;True;True;True;True;True;True;True;True;True;True;True;True;True;True;True;True;True;True;True;True;True;True;True;True;True;True;True;True;True;True;True;True;True;True;True;True;True;True;True;True;True;True;True;True;True;True…	3159;3546;3583;3986;4782;4787;4788;4857;4923;5311;5312;5590;5591;6385;7019;7603;7604;7789;8131;8132;8260;8261;9091;9673;9711;10467;10468;12026;12155;12772;12773;12799;12923;13640;13641;13642;13643;14293;14957;14958;15088;15089;15966;15967;16351;16353;16521;16741;17219;17594;17827;17828;18412;19171;19172;19474;19892;19893;20891;20994;21149;21896;22129;23668;24022;24155;25165;25260;27436;27437;3024…	32621;32622;32623;32624;32625;32626;32627;32628;32629;32630;32631;32632;32633;32634;32635;32636;32637;32638;32639;32640;32641;32642;32643;32644;32645;32646;32647;32648;32649;32650;32651;32652;32653;32654;32655;32656;32657;32658;32659;32660;32661;32662;36847;36848;36849;37343;37344;37345;37346;37347;37348;37349;37350;37351;37352;37353;37354;37355;37356;37357;37358;37359;37360;37361;37362;37363;373…
Q01149;E9Q6U9;E0CXI2	Q01149;E9Q6U9	Collagen alpha-2(I) chain	Col1a2	112	112	110	91.5	6925800000000	1150900000000	1025200000000	1025700000000	648600000000	506630000000	721720000000	505070000000	441840000000	251640000000	648480000000	1030300000000	1050700000000	1004100000000	1216300000000	1532500000000	636660000000	651720000000	616220000000	829510000000	592970000000	1274;1275;1507;3437;3956;5798;5799;5886;7883;9157;9158;9219;9220;9221;10237;13803;13804;14056;14218;14260;14261;14408;14512;14598;14600;14601;14608;14732;14733;14757;14758;14769;14783;14792;14793;14804;14805;14818;14840;14863;14864;15052;15384;15397;15402;15561;15562;15566;15925;15928;15929;15932;15950;16056;16288;16289;16290;16413;16427;16428;16429;16430;16509;16510;16511;16512;16514;16515;16518…	True;True;True;True;True;True;True;True;True;True;True;True;True;True;True;True;True;True;True;True;True;True;True;True;True;True;True;True;True;True;True;True;True;True;True;True;True;True;True;True;True;True;True;True;True;True;True;True;True;True;True;True;True;True;True;True;True;True;True;True;True;True;True;True;True;True;True;True;True;True;True;True;True;True;True;True;True;True;True;True…	1399;1400;1659;1660;3792;4364;6364;6365;6462;8645;10040;10041;10111;10112;10113;11208;11209;11210;15146;15147;15426;15603;15652;15653;15813;15814;15932;16028;16030;16031;16039;16182;16183;16215;16216;16229;16244;16255;16256;16268;16269;16282;16308;16335;16336;16546;16903;16916;16921;16922;17089;17090;17094;17481;17484;17485;17488;17508;17620;17910;17911;17912;18048;18049;18064;18065;18066;18067;1…	14258;14259;14260;14261;14262;14263;14264;14265;14266;14267;14268;14269;14270;14271;14272;14273;14274;14275;16936;16937;16938;16939;16940;16941;16942;16943;16944;16945;16946;16947;16948;16949;16950;16951;16952;16953;16954;16955;16956;39344;39345;39346;39347;39348;45236;45237;45238;45239;45240;45241;45242;45243;45244;45245;45246;45247;45248;45249;45250;45251;45252;45253;45254;45255;45256;45257;452…
P11087;P11087-2;F8WGB7;CON__Q862S4	P11087;P11087-2;F8WGB7	Collagen alpha-1(I) chain	Col1a1	110	109	106	87.4	6716600000000	1174500000000	916790000000	1000200000000	649680000000	479420000000	653560000000	499480000000	424030000000	260270000000	658710000000	1015400000000	994240000000	925190000000	1183300000000	1407800000000	582040000000	649370000000	521720000000	876240000000	532930000000	560;561;562;2271;2272;5680;5681;5742;5767;6400;7198;9077;9244;9245;13802;14057;14059;14088;14208;14216;14217;14365;14366;14491;14492;14523;14555;14609;14610;14611;14688;14770;14771;14773;14787;14789;14791;14806;14807;14839;14841;14842;14844;14845;15035;15044;15081;15082;15083;15396;15944;15945;15946;15951;16026;16027;16028;16165;16227;16243;16286;16287;16442;16444;16459;16471;16472;16500;16501;16…	True;True;True;True;True;True;True;True;True;True;True;True;True;True;True;True;True;True;True;True;True;True;True;True;True;True;True;True;True;True;True;True;True;True;True;True;True;True;True;True;True;True;True;True;True;True;True;True;True;True;True;True;True;True;True;True;True;True;True;True;True;True;True;True;True;True;True;True;True;True;True;True;True;True;True;True;True;True;True;True…	614;615;616;2499;2500;6233;6234;6303;6304;6329;7018;7916;9954;10137;10138;15145;15427;15429;15463;15593;15601;15602;15765;15766;15906;15907;15945;15978;15979;16040;16041;16042;16129;16230;16231;16233;16249;16251;16253;16254;16270;16271;16307;16309;16310;16312;16313;16528;16537;16576;16577;16578;16915;17501;17502;17503;17504;17509;17510;17587;17588;17589;17773;17839;17859;17908;17909;18080;18081;1…	6082;6083;6084;6085;6086;6087;6088;6089;6090;6091;6092;6093;6094;6095;6096;6097;6098;6099;6100;6101;6102;6103;6104;6105;6106;6107;6108;6109;6110;6111;6112;25516;25517;25518;25519;25520;25521;25522;25523;25524;25525;25526;25527;25528;25529;25530;25531;25532;25533;25534;25535;25536;25537;25538;25539;25540;25541;25542;25543;25544;25545;25546;25547;25548;25549;25550;25551;25552;25553;25554;25555;2555…	4352;4353;4354;4355;4356;4357;4358;4359;4360;4361;4362;4363;4364;4365;4366;4367;4368;4369;4370;17868;17869;17870;17871;17872;17873;17874;17875;17876;17877;17878;17879;17880;17881;17882;17883;17884;17885;17886;17887;17888;17889;17890;17891;17892;17893;17894;17895;17896;17897;17898;17899;17900;17901;17902;17903;17904;17905;17906;17907;17908;17909;17910;17911;17912;17913;17914;17915;17916;17917;1791…	4358;4359;4366;18076;18189;45437;45456;46051;46352;51953;58661;74225;75754;75758;112228;114358;114379;114700;115502;115621;115678;116796;116846;117942;117946;118364;118693;119241;119274;119280;119977;121172;121198;121209;121484;121558;121588;121809;121824;122084;122104;122128;122151;122193;124167;124278;124706;124724;124801;127246;131918;132033;132044;132219;132725;132766;132771;134227;134687;134…	1921;1922;1923;1924;1925;1926;1927;1928;1929;1930;1931;1932	153;170;206;253;290;569;718;989;1253;1282;1319;1366
P08121;Q5DTG2;F6SIG2	P08121;Q5DTG2;F6SIG2	Collagen alpha-1(III) chain	Col3a1	103	101	80	80	5506000000000	955220000000	791840000000	787720000000	493520000000	364550000000	599350000000	388360000000	354390000000	192340000000	578740000000	793840000000	792500000000	729430000000	857360000000	1055000000000	491520000000	513470000000	447520000000	637570000000	481440000000	2620;3437;5693;5800;5806;5807;5858;5859;5876;5881;12057;13805;14219;14490;14522;14532;14533;14534;14536;14537;14614;14636;14677;14678;14702;14750;14759;14761;14778;14788;14816;14822;14823;14834;14843;14860;14865;14866;15045;15133;15243;15244;15245;15249;15682;15947;15948;16127;16128;16129;16164;16277;16278;16279;16282;16283;16284;16426;16439;16440;16460;16461;16462;16473;16513;16516;16551;16552;1…	True;False;True;True;True;True;True;True;True;True;True;True;True;True;True;True;True;True;True;True;True;True;True;True;True;True;True;True;True;True;True;True;True;True;True;True;True;True;True;True;True;True;True;True;True;True;True;True;True;True;True;True;True;True;True;True;True;True;True;True;True;True;True;True;True;True;True;True;True;True;True;True;True;True;True;True;True;True;True;Tru…	2910;2911;3792;6246;6366;6375;6376;6430;6431;6450;6455;13209;15148;15604;15905;15944;15955;15956;15957;15959;15960;16047;16070;16117;16118;16145;16202;16203;16217;16218;16220;16239;16250;16280;16287;16288;16300;16311;16331;16337;16338;16538;16629;16752;16753;16754;16758;17223;17224;17505;17506;17714;17715;17716;17717;17718;17719;17772;17895;17896;17897;17898;17899;17903;17904;17905;17906;18063;18…	30442;30443;30444;30445;30446;30447;39344;39345;39346;39347;39348;64753;64754;64755;64756;64757;64758;64759;64760;66200;66201;66202;66203;66204;66205;66206;66207;66295;66296;66297;66298;66299;66300;66301;66302;66303;66304;66305;66306;66307;66308;66309;66310;66311;66312;66313;66314;66315;66316;66317;66318;66319;66320;66321;66322;66323;66324;66325;66326;66327;66328;66329;66330;66331;66332;66333;663…	21321;21322;27504;27505;27506;27507;45518;45519;45520;45521;45522;45523;45524;46644;46645;46646;46647;46721;46722;46723;46724;46725;46726;46727;46728;46729;46730;46731;46732;46733;46734;46735;46736;46737;46738;46739;46740;46741;46742;46743;46744;46745;46746;46747;46748;46749;46750;46751;46752;46753;46754;46755;46756;46757;46758;46759;46760;46761;46762;46763;46764;46765;46766;46767;46768;46769;467…	21322;27504;45518;46647;46742;46765;47255;47288;47406;47430;97235;112356;115702;117939;118212;118427;118430;118452;118463;118487;119340;119522;119800;119851;120148;120716;121018;121062;121251;121487;121935;121963;121971;122043;122147;122310;122469;122472;124289;125207;126026;126049;126052;126081;129729;132051;132075;133828;133846;133862;134221;135063;135104;135153;135177;135353;135374;136796;1370…	386;387;388;389;390;1811;1812;1813;1814;1815;1816;1817;1818;1819;1820;1821	255;261;298;397;537;577;726;963;1223;1233;1294;1306;1330;1377;1391;1435
E9PZ16;E9QL02;Q3UHH3	E9PZ16;E9QL02;Q3UHH3		Hspg2	207	207	1	63.4	4256700000000	703030000000	628500000000	678910000000	347510000000	225340000000	517660000000	295070000000	271530000000	113580000000	475540000000	678960000000	703770000000	686910000000	669330000000	647850000000	475470000000	411470000000	362030000000	418250000000	417610000000	177;363;900;922;1047;1395;1405;1628;1629;2109;2110;2437;2519;2577;2609;2855;2961;3046;3534;3535;3587;4204;4274;4303;4338;4356;4390;4404;4411;4520;4531;4547;4695;4712;4759;4768;4774;4863;4926;5539;5826;5844;6093;6094;6216;6803;7033;8030;8270;8441;8991;9119;9123;9340;9341;11044;11459;11460;11626;12089;13065;13360;13525;13526;13639;15275;15276;15277;15278;15416;16117;16147;16304;16504;16521;16691;16…	True;True;True;True;True;True;True;True;True;True;True;True;True;True;True;True;True;True;True;True;True;True;True;True;True;True;True;True;True;True;True;True;True;True;True;True;True;True;True;True;True;True;True;True;True;True;True;True;True;True;True;True;True;True;True;True;True;True;True;True;True;True;True;True;True;True;True;True;True;True;True;True;True;True;True;True;True;True;True;True…	190;398;992;1017;1018;1154;1537;1547;1796;1797;2329;2330;2682;2774;2842;2843;2892;2893;3175;3285;3373;3901;3902;3963;4628;4705;4736;4776;4794;4832;4848;4855;4856;4972;4984;5000;5165;5185;5236;5245;5251;5252;5345;5346;5411;6071;6398;6416;6687;6688;6820;7483;7741;8807;8808;9072;9253;9858;10001;10005;10244;10245;10246;10247;12115;12558;12559;12741;13242;13243;14304;14654;14839;14840;14966;16785;1678…	1982;1983;1984;1985;1986;1987;1988;1989;1990;1991;1992;1993;1994;1995;1996;1997;1998;1999;2000;3858;3859;3860;3861;3862;3863;3864;3865;3866;3867;3868;3869;3870;3871;3872;3873;3874;3875;3876;3877;3878;3879;3880;3881;3882;3883;3884;3885;3886;3887;3888;3889;3890;3891;3892;3893;3894;3895;3896;10137;10138;10139;10140;10141;10142;10143;10144;10145;10146;10147;10148;10149;10150;10151;10152;10153;10154;1…
Q60847;Q60847-2;Q60847-5;E9PX70;Q60847-3;Q60847-4;F6WIM8	Q60847;Q60847-2;Q60847-5;E9PX70;Q60847-3;Q60847-4	Collagen alpha-1(XII) chain	Col12a1	188	188	188	69.5	3505600000000	544260000000	478270000000	495220000000	267830000000	177500000000	464460000000	284230000000	258310000000	115180000000	420350000000	544920000000	564280000000	536720000000	526630000000	500830000000	456280000000	411080000000	368820000000	406940000000	413250000000	630;631;739;1018;1133;1802;1956;3193;3194;4312;4672;5370;5666;6210;6505;6663;6672;6976;7193;7194;7560;7795;7941;8115;8480;8975;9259;10511;10793;11636;11647;11648;12699;13203;13493;13771;14420;14519;14557;14561;14562;14784;14874;15235;15236;15554;16037;16349;16452;16454;16455;16456;16457;16592;16833;16935;16982;17082;17201;18103;18882;19534;19689;19690;20078;20215;20216;20416;20417;20673;20752;215…	True;True;True;True;True;True;True;True;True;True;True;True;True;True;True;True;True;True;True;True;True;True;True;True;True;True;True;True;True;True;True;True;True;True;True;True;True;True;True;True;True;True;True;True;True;True;True;True;True;True;True;True;True;True;True;True;True;True;True;True;True;True;True;True;True;True;True;True;True;True;True;True;True;True;True;True;True;True;True;True…	694;695;817;1120;1243;1993;2162;3531;3532;4745;5137;5892;6217;6218;6812;6813;7126;7304;7314;7315;7680;7911;7912;8299;8549;8550;8707;8902;9299;9840;10154;11549;11852;12752;12766;12767;13908;14485;14486;14806;15110;15826;15827;15828;15939;15940;15941;15981;15986;15987;16245;16246;16346;16742;16743;16744;16745;17082;17600;17601;17976;18092;18094;18095;18096;18097;18250;18517;18629;18680;18786;18909;…	6873;6874;6875;6876;6877;6878;6879;6880;6881;6882;6883;6884;6885;6886;6887;6888;6889;6890;6891;6892;6893;6894;6895;6896;6897;6898;6899;6900;6901;6902;6903;6904;6905;6906;6907;6908;6909;6910;6911;6912;6913;6914;6915;6916;6917;6918;6919;6920;6921;6922;6923;6924;6925;6926;6927;6928;6929;6930;6931;6932;6933;6934;6935;6936;6937;6938;6939;6940;6941;6942;6943;6944;6945;6946;6947;6948;6949;6950;6951;6952…
P63260;E9Q607;F8WI82;G3UZ07;B1ATY1;G3UYG0;E9Q606;F8WGM8	P63260;E9Q607;F8WI82;G3UZ07	Actin, cytoplasmic 2;Actin, cytoplasmic 2, N-terminally processed	Actg1	31	31	2	82.4	2430600000000	311690000000	264020000000	321990000000	165510000000	130020000000	353360000000	235330000000	217200000000	109700000000	321750000000	258170000000	258190000000	284780000000	286870000000	339900000000	277500000000	292790000000	253970000000	336230000000	259210000000	1298;1299;3863;3864;4359;4681;6676;6677;6734;6735;7471;7472;8625;9606;13447;17646;17647;18628;20203;20204;22175;23512;23659;29237;34038;34039;35970;40405;42777;43499;49169	True;True;True;True;True;True;True;True;True;True;True;True;True;True;True;True;True;True;True;True;True;True;True;True;True;True;True;True;True;True;True	1427;1428;4265;4266;4797;5146;5147;5148;7319;7320;7321;7384;7385;7386;8206;8207;9455;9456;10536;10537;14750;14751;14752;19391;19392;20478;20479;20480;22196;22197;24443;25889;25890;26046;26047;32260;38099;38100;40190;45034;47712;47713;48509;54746;54747	14529;14530;14531;14532;14533;14534;14535;14536;14537;14538;14539;14540;14541;14542;14543;14544;14545;14546;14547;14548;14549;14550;14551;14552;44257;44258;44259;44260;44261;44262;44263;44264;44265;44266;44267;44268;44269;44270;44271;44272;44273;44274;44275;44276;44277;44278;44279;44280;44281;44282;44283;44284;44285;44286;44287;44288;44289;44290;44291;44292;44293;44294;44295;44296;44297;44298;442…	10182;10183;10184;10185;10186;10187;10188;10189;10190;10191;10192;10193;10194;10195;30900;30901;30902;30903;30904;30905;30906;30907;30908;30909;30910;30911;30912;30913;30914;30915;30916;30917;30918;30919;30920;30921;30922;30923;30924;30925;30926;30927;30928;30929;30930;30931;30932;30933;30934;30935;30936;30937;30938;30939;30940;30941;30942;30943;30944;30945;30946;30947;30948;30949;30950;30951;309…	10182;10192;30932;31005;35091;37627;54091;54141;54874;54896;61187;61197;70886;78997;109226;147514;147558;157282;170696;170704;188914;199609;201060;245717;287292;287341;301315;335053;356001;362404;409970	429;430;432;433;434;435;436;437;438;439;2930	16;44;47;82;153;190;227;269;283;305;325
Q5NCU4;P07214;Q5NCU3	Q5NCU4;P07214	SPARC	Sparc	17	17	17	62.8	2236100000000	393120000000	325910000000	319110000000	217360000000	122590000000	254180000000	150190000000	136920000000	74934000000	241830000000	272810000000	287150000000	256690000000	286310000000	315470000000	184300000000	187800000000	142460000000	232890000000	172170000000	2851;4838;4839;5368;12348;23835;25042;32077;32078;32224;36275;36276;41073;43636;48723;48724;48725	True;True;True;True;True;True;True;True;True;True;True;True;True;True;True;True;True	3170;3171;5320;5321;5890;13525;26233;27549;35933;35934;36093;36094;40514;40515;45778;48653;48654;54248;54249;54250	32781;32782;32783;32784;32785;32786;32787;32788;32789;32790;32791;32792;32793;32794;32795;32796;32797;32798;32799;32800;32801;32802;32803;32804;32805;32806;32807;32808;32809;32810;32811;32812;32813;32814;32815;32816;32817;32818;32819;32820;32821;32822;32823;32824;32825;32826;32827;32828;32829;32830;32831;32832;32833;32834;32835;32836;32837;32838;32839;32840;32841;32842;32843;32844;32845;32846;328…	22894;22895;22896;22897;22898;22899;22900;22901;22902;22903;22904;22905;22906;22907;22908;22909;22910;22911;22912;22913;22914;22915;22916;22917;22918;22919;22920;22921;22922;22923;22924;22925;22926;22927;22928;22929;22930;22931;22932;22933;22934;22935;22936;22937;22938;22939;22940;22941;22942;22943;22944;22945;22946;22947;22948;22949;22950;22951;22952;22953;22954;22955;22956;22957;22958;22959;229…	22897;38928;38935;43113;99674;202390;211638;271238;271414;272844;303968;303991;340872;363612;406082;406226;406250	1773;1774;1775	90;224;260
E9PWQ3;F6R0L1	E9PWQ3		Col6a3	169	169	37	71.8	2187400000000	360680000000	315970000000	311070000000	191250000000	127650000000	269500000000	145980000000	159660000000	62525000000	243110000000	352150000000	364960000000	332880000000	379970000000	397110000000	255120000000	212010000000	237470000000	237570000000	238430000000	76;167;467;510;629;854;954;1909;2069;2328;3435;3467;5028;5470;5471;6230;6231;6675;7145;7330;7806;7807;8753;9400;9401;9886;10062;10067;11550;11620;11709;11991;12643;13534;13956;14524;14546;14727;14835;14836;14837;15027;15055;15189;15247;15280;15591;16238;16239;16371;16533;16871;16947;17462;17734;18795;19067;19201;19526;19537;19561;19926;20084;20237;20899;21490;21601;21984;22302;22346;23575;24014;2…	True;True;True;True;True;True;True;True;True;True;True;True;True;True;True;True;True;True;True;True;True;True;True;True;True;True;True;True;True;True;True;True;True;True;True;True;True;True;True;True;True;True;True;True;True;True;True;True;True;True;True;True;True;True;True;True;True;True;True;True;True;True;True;True;True;True;True;True;True;True;True;True;True;True;True;True;True;True;True;True…	82;179;180;509;559;693;940;1051;2113;2286;2563;3790;3826;3827;5525;5998;5999;6835;6836;7318;7862;8054;8565;8566;9595;10312;10313;10314;10315;10834;11025;11030;12656;12735;12833;13139;13848;14848;15319;15946;15969;16177;16301;16302;16303;16304;16519;16520;16549;16692;16756;16791;17125;17853;17854;17999;18188;18557;18642;19193;19483;20659;20956;21102;21452;21467;21493;21891;22064;22232;23011;23012;…	817;818;819;820;821;822;823;1862;1863;1864;1865;1866;1867;1868;1869;1870;1871;1872;1873;1874;1875;1876;1877;1878;1879;5041;5042;5043;5044;5045;5046;5047;5048;5604;5605;5606;5607;5608;5609;5610;5611;5612;5613;5614;5615;5616;5617;5618;5619;5620;5621;5622;5623;5624;6859;6860;6861;6862;6863;6864;6865;6866;6867;6868;6869;6870;6871;6872;9641;9642;9643;9644;9645;9646;9647;9648;9649;9650;9651;9652;9653;9…	606;607;608;1357;1358;1359;1360;1361;1362;1363;1364;1365;1366;1367;1368;1369;3590;3591;3592;3593;4013;4014;4015;4016;4017;4018;4019;4020;4021;4022;4023;4024;4025;4026;4027;4028;4029;4900;4901;4902;4903;4904;4905;6744;6745;6746;6747;6748;6749;6750;6751;6752;6753;6754;6755;6756;6757;7584;15222;15223;15224;15225;15226;15227;15228;15229;15230;15231;16358;16359;16360;16361;16362;16363;16364;16365;1636…	606;1368;3590;4026;4900;6751;7584;15231;16362;18579;27502;27739;40399;43836;43837;50388;50398;54074;58235;59672;64069;64093;71834;77183;77215;80966;82276;82360;92996;93610;94440;96650;102439;109899;113640;118371;118578;120368;122045;122056;122071;124049;124505;125651;126063;126359;128855;134834;134837;136191;138348;141190;141914;146190;148448;158750;161692;162711;165082;165206;165347;168268;16951…	593;594;595;596;597;598;599;600;601;602;603;604;605;606;607;608;609;610;611;612;613;614;615;616	170;208;213;476;565;672;1000;1210;1280;1349;1391;1569;1812;1882;2029;2097;2104;2130;2133;2138;2201;2392;2587;2650
Q8VDD5;F7AUR3;E9Q3T2;F2Z494	Q8VDD5	Myosin-9	Myh9	141	141	115	67.4	1910500000000	298890000000	234730000000	260860000000	145160000000	93215000000	255640000000	165860000000	159530000000	66492000000	230140000000	276810000000	266030000000	261400000000	256530000000	282910000000	227050000000	228380000000	216500000000	257700000000	223080000000	591;592;1503;1504;2059;2080;2099;2711;3357;3445;4509;4650;5188;5322;5389;5612;5613;6348;6381;6382;6429;6633;6768;7098;7186;7632;7707;7708;8517;8627;8690;8842;8843;9143;9763;9818;10245;10658;10717;10898;12165;13030;13909;14174;14460;14461;17833;17839;18243;18752;19183;19184;19186;20269;20855;20933;21416;21745;22366;22367;22408;22572;22585;22590;22651;22810;22875;23721;23921;23968;24214;27075;27180…	True;True;True;True;True;True;True;True;True;True;True;True;True;True;True;True;True;True;True;True;True;True;True;True;True;True;True;True;True;True;True;True;True;True;True;True;True;True;True;True;True;True;True;True;True;True;True;True;True;True;True;True;True;True;True;True;True;True;True;True;True;True;True;True;True;True;True;True;True;True;True;True;True;True;True;True;True;True;True;True…	649;650;651;1654;1655;2275;2276;2297;2317;2318;3020;3705;3800;4959;5115;5698;5843;5911;6154;6155;6963;6997;6998;7047;7273;7425;7426;7427;7428;7811;7904;8376;8454;8455;9343;9458;9526;9698;9699;10026;10704;10705;10761;11223;11224;11709;11769;11963;13328;14263;15267;15554;15870;15871;19598;19599;19605;20050;20611;21083;21084;21086;22271;22272;22929;22930;22931;23054;23586;23971;24641;24642;24685;248…	6413;6414;6415;6416;6417;6418;6419;6420;6421;6422;6423;6424;6425;6426;6427;6428;6429;6430;6431;6432;6433;6434;6435;6436;6437;6438;6439;6440;6441;6442;6443;6444;16818;16819;16820;16821;16822;16823;16824;16825;16826;16827;16828;16829;16830;16831;16832;16833;16834;16835;16836;16837;16838;16839;16840;16841;16842;16843;16844;16845;16846;16847;16848;16849;16850;16851;16852;16853;16854;16855;16856;16857…	4578;4579;4580;4581;4582;4583;4584;4585;4586;4587;4588;4589;4590;4591;4592;4593;4594;4595;4596;4597;4598;4599;4600;4601;4602;4603;4604;11744;11745;11746;11747;11748;11749;11750;11751;11752;11753;11754;11755;11756;11757;11758;11759;11760;11761;11762;11763;11764;11765;11766;11767;11768;11769;11770;11771;11772;11773;11774;11775;11776;11777;11778;11779;11780;11781;11782;11783;11784;11785;11786;11787;…	4579;4599;11752;11780;16294;16460;16621;21934;26929;27551;36327;37371;41712;42835;43284;45009;45025;51515;51817;51820;52245;53673;55092;57801;58613;62713;63261;63274;69871;70903;71446;72584;72609;74838;80096;80450;83848;86948;87312;88509;98121;105350;113313;115292;117732;117734;149477;149516;153454;158357;162528;162577;162579;171333;176747;177468;181781;184792;190516;190547;190878;192210;192294;1…	3491;3495;3502;4727;4728;4729;4730;4731;4732;4733;4734;4735;4736;4737;4738;4739;4740;4741;4742;4743;4744;4745;4746;4747;4748;4749;4750;4751;4752;4753;4754;4755;4756;4757;4758;4759	86;137;146;161;162;318;323;326;329;337;484;586;589;627;743;809;871;874;879;941;983;1009;1028;1190;1369;1373;1489;1506;1510;1537;1565;1594;1678;1682;1797;1910
Q8BTM8;B7FAU9;B7FAV1;F6XC15;F6Z2C0;Q8BTM8-2;F7AVL7	Q8BTM8;B7FAU9;B7FAV1	Filamin-A	Flna	145	138	135	71.1	1864400000000	284670000000	236400000000	237530000000	152290000000	103580000000	227330000000	163370000000	154040000000	67697000000	237520000000	275030000000	270560000000	247410000000	308090000000	321320000000	218730000000	237530000000	219230000000	276700000000	223290000000	818;835;859;864;865;1086;1087;1411;1494;1548;1635;1880;2137;2475;2710;2924;3338;4159;4221;4301;4302;4796;4822;5014;5016;5017;5018;5035;5837;5841;6265;6285;6286;6852;7626;8098;8213;8240;8241;8299;8659;8660;8781;9252;9253;10364;11221;11881;12474;13160;13161;13174;13888;13895;13896;14146;14374;14413;14885;16049;16613;17175;18515;18791;19160;19511;21061;21347;22095;22449;23799;25120;25121;25458;25824…	True;True;True;True;True;True;True;True;True;True;True;False;True;True;True;True;True;True;True;True;True;True;True;True;True;True;True;True;True;True;True;False;False;True;True;True;True;True;True;True;True;True;True;True;True;True;True;True;True;True;True;True;True;True;True;True;True;True;True;True;True;True;True;True;True;True;True;False;True;True;True;False;True;True;False;True;True;True;Tru…	901;918;947;952;953;1195;1196;1553;1554;1645;1705;1804;2083;2357;2725;3019;3247;3685;4582;4645;4646;4734;4735;5275;5276;5303;5304;5509;5511;5512;5513;5533;6409;6413;6872;6894;6895;7543;8368;8884;9005;9006;9036;9037;9101;9494;9495;9633;10146;10147;11391;12304;13019;13663;14442;14443;14456;15241;15242;15243;15252;15253;15526;15776;15819;16358;17613;18276;18883;20355;20654;20655;21056;21437;23199;23…	9159;9160;9161;9162;9163;9164;9334;9335;9336;9337;9338;9339;9340;9341;9342;9691;9692;9693;9694;9695;9696;9697;9698;9699;9700;9701;9702;9703;9704;9705;9706;9707;9708;9709;9710;9711;9712;9713;9714;9715;9716;9717;9718;9719;9720;9721;9722;9723;9724;9725;9726;9727;9728;9729;9767;9768;9769;9770;9771;9772;9773;9774;9775;9776;9777;9778;9779;9780;9781;9782;9783;9784;9785;9786;9787;9788;9789;9790;9791;9792…	6381;6382;6383;6516;6517;6518;6519;6520;6778;6779;6780;6781;6782;6783;6784;6785;6786;6787;6788;6789;6790;6791;6792;6793;6794;6795;6796;6797;6798;6799;6800;6801;6802;6803;6804;6805;6806;6807;6833;6834;6835;6836;6837;6838;6839;6840;6841;6842;6843;6844;6845;6846;6847;6848;6849;6850;6851;6852;6853;8544;8545;8546;8547;8548;8549;8550;8551;8552;8553;8554;8555;8556;8557;8558;8559;11046;11047;11048;11049;…	6382;6517;6796;6833;6843;8555;8559;11071;11658;12228;13008;15064;16914;19880;21917;23734;26736;33596;34010;34723;34734;38615;38796;40288;40309;40319;40324;40533;47032;47105;50696;50930;50949;55831;62614;66618;67416;67657;67672;68232;71212;71242;72178;75816;75850;84897;90798;95737;101063;106723;106734;106851;113103;113187;113221;115135;116941;117478;122669;133065;139161;143553;155883;158729;162309…	315;316;317;318;319;320;321;322;323;324;325;326;327;328;329;330;331;332;333;334	102;229;258;297;450;660;746;849;1400;1462;1777;1842;1849;1958;2174;2207;2209;2474;2490;2589
P16045	P16045	Galectin-1	Lgals1	15	15	15	94.1	1681700000000	236470000000	186120000000	218230000000	135660000000	88677000000	238980000000	165520000000	136280000000	67855000000	207920000000	230940000000	229780000000	222230000000	193280000000	253580000000	212490000000	236730000000	174100000000	233890000000	184550000000	486;487;7403;8445;8446;10485;13147;13298;14857;26532;26672;26673;37912;37913;46451	True;True;True;True;True;True;True;True;True;True;True;True;True;True;True	531;532;533;534;8133;9257;9258;11520;14429;14586;14587;14588;16328;29208;29209;29210;29366;29367;42293;42294;51778	5245;5246;5247;5248;5249;5250;5251;5252;5253;5254;5255;5256;5257;5258;5259;5260;5261;5262;5263;5264;5265;5266;5267;5268;5269;5270;5271;5272;5273;5274;5275;5276;5277;5278;5279;5280;5281;5282;5283;5284;5285;5286;5287;5288;5289;5290;5291;5292;5293;5294;5295;5296;5297;5298;5299;5300;5301;5302;5303;5304;5305;5306;5307;5308;5309;5310;5311;5312;5313;5314;5315;5316;5317;5318;5319;5320;5321;5322;5323;5324…	3733;3734;3735;3736;3737;3738;3739;3740;3741;3742;3743;3744;3745;3746;3747;3748;3749;3750;3751;3752;3753;3754;3755;3756;3757;3758;3759;3760;3761;3762;3763;3764;3765;3766;3767;3768;3769;3770;3771;3772;3773;3774;3775;3776;3777;3778;3779;3780;3781;3782;3783;3784;3785;3786;3787;3788;3789;3790;3791;3792;3793;3794;3795;3796;3797;3798;3799;3800;3801;3802;3803;3804;3805;3806;3807;3808;3809;3810;3811;3812…	3740;3803;60484;69223;69277;85826;106463;107796;122296;223669;224890;224927;316019;316057;387957	2042;2043	115;121
P20152;E9PZV5;P15331;A2AKJ2;P15331-3;G5E846;P15331-2;G3X981	P20152;E9PZV5	Vimentin	Vim	51	51	43	83.3	1572800000000	206700000000	171800000000	196990000000	123450000000	104520000000	197570000000	162430000000	146190000000	73857000000	189280000000	172050000000	189300000000	192030000000	211270000000	245620000000	179900000000	254850000000	201420000000	233460000000	180630000000	3240;5824;6872;8571;8572;10246;11293;11815;11879;11880;11972;12868;17121;18387;20642;20643;21597;22610;22886;24605;24606;24607;24980;24981;25689;26057;27008;27046;27047;27048;29046;29047;29368;31269;32451;33882;34015;35042;35286;35369;36755;36763;39032;39629;39630;43244;44076;44077;44157;44180;46446	True;True;True;True;True;True;True;True;True;True;True;True;True;True;True;True;True;True;True;True;True;True;True;True;True;True;True;True;True;True;True;True;True;True;True;True;True;True;True;True;True;True;True;True;True;True;True;True;True;True;True	3580;3581;6396;7564;7565;9398;9399;11225;11226;12380;12944;13017;13018;13119;14089;18827;20206;22679;22680;23787;24902;25200;27073;27074;27075;27076;27077;27480;27481;28245;28637;29734;29735;29775;29776;29777;29778;29779;29780;31953;31954;31955;31956;32461;35018;36341;37930;38075;39196;39459;39550;41030;41039;43506;44184;44185;44186;44187;48229;49137;49138;49226;49250;49251;51773	37278;37279;37280;37281;37282;37283;37284;37285;37286;37287;37288;37289;37290;37291;37292;37293;37294;37295;37296;37297;37298;37299;37300;37301;37302;37303;37304;37305;37306;37307;37308;37309;37310;37311;37312;37313;37314;37315;37316;37317;37318;37319;37320;37321;37322;37323;37324;37325;37326;37327;37328;37329;37330;37331;66544;66545;66546;66547;66548;66549;66550;66551;66552;66553;66554;66555;665…	26065;26066;26067;26068;26069;26070;26071;26072;26073;26074;26075;26076;26077;26078;26079;26080;26081;26082;26083;26084;26085;26086;26087;26088;26089;26090;26091;26092;26093;26094;26095;26096;26097;26098;26099;26100;26101;26102;26103;26104;26105;26106;26107;26108;26109;26110;46904;46905;46906;46907;46908;46909;46910;46911;46912;46913;46914;46915;46916;46917;46918;46919;46920;46921;46922;46923;469…	26091;46909;56021;70375;70380;83897;91287;95297;95711;95727;96478;104108;143188;154724;174944;174991;183355;192456;194589;208149;208159;208170;211017;211043;216678;219565;227445;227692;227824;227837;243713;243747;247024;264089;274770;286331;287117;294297;296066;296688;307508;307593;324691;329157;329171;360200;367301;367319;368039;368356;387901	699;700;701;702;703;704	154;183;193;347;372;391
O88322	O88322	Nidogen-2	Nid2	77	77	76	73.3	1473200000000	238470000000	245210000000	206750000000	127140000000	83781000000	184310000000	107740000000	89590000000	40011000000	150170000000	245110000000	271960000000	238420000000	274980000000	249180000000	176610000000	155380000000	143220000000	144850000000	162170000000	671;878;1039;1869;1870;1871;2761;3370;3371;3430;4456;4479;4507;4749;5308;5893;6062;7341;7460;8208;8540;9033;11051;11153;11203;11319;11945;11946;12026;13965;14070;14071;14406;14407;16225;17776;17777;18248;19486;19701;19733;20131;20834;21861;22564;22565;23879;23880;25563;27513;30154;31344;31942;31943;32389;32422;32715;33492;34223;34224;35666;35730;37381;37419;38171;38225;41250;41884;42134;44532;445…	True;True;True;True;True;True;True;True;True;True;True;True;True;True;True;True;True;True;True;True;True;True;True;True;True;True;True;True;True;True;True;True;True;True;True;True;True;True;True;True;True;True;True;True;True;True;True;True;True;True;True;True;True;True;True;True;True;True;True;True;True;True;True;True;True;True;True;True;True;True;True;True;True;True;True;True;True	743;967;1145;2071;2072;2073;3072;3721;3722;3785;4903;4926;4957;5226;5829;6470;6652;8065;8195;8999;9367;9904;12122;12232;12285;12406;13087;13088;13177;15328;15441;15442;15811;15812;17837;19528;19529;20055;21410;21642;21678;22118;22897;24097;24852;24853;26283;26284;28115;30281;33773;33774;35096;35778;35779;36276;36312;36630;37492;38301;38302;39868;39936;41710;41754;42580;42639;45971;46665;46990;469…	7476;7477;7478;7479;7480;7481;7482;7483;7484;7485;7486;7487;7488;7489;7490;7491;7492;7493;7494;7495;9893;9894;9895;9896;9897;9898;9899;9900;9901;9902;11685;11686;11687;11688;11689;11690;11691;11692;11693;11694;11695;11696;11697;11698;11699;11700;11701;11702;11703;11704;11705;11706;11707;11708;11709;21396;21397;21398;21399;21400;21401;21402;21403;21404;21405;21406;21407;21408;21409;21410;21411;214…	5277;5278;5279;5280;5281;5282;5283;5284;5285;5286;5287;5288;5289;5290;6915;6916;6917;8108;8109;8110;8111;8112;8113;8114;8115;8116;8117;8118;8119;8120;8121;8122;8123;8124;8125;8126;8127;8128;8129;8130;8131;8132;8133;8134;8135;14924;14925;14926;14927;14928;14929;14930;14931;14932;14933;14934;14935;14936;14937;14938;14939;14940;14941;14942;14943;14944;14945;22244;22245;22246;22247;22248;22249;22250;…	5288;6915;8121;14928;14941;14945;22245;27098;27122;27485;35898;36063;36295;38269;42746;47602;49174;59751;61131;67390;70112;73885;89533;90254;90665;91431;96199;96207;96961;113720;114475;114483;117196;117229;134670;148742;148766;153560;164797;166554;166900;170055;176536;185721;192127;192146;202741;202745;215822;231706;254964;264899;270193;270198;274233;274584;276955;283069;288680;288682;298651;2991…	1610;1611;1612	417;1183;1228
P48678;P48678-2;P48678-3;D3YUF7	P48678;P48678-2;P48678-3	Prelamin-A/C;Lamin-A/C	Lmna	59	59	58	76.5	1384300000000	196790000000	148480000000	178400000000	104260000000	76314000000	185520000000	116220000000	131040000000	56763000000	190540000000	199090000000	170020000000	188770000000	179860000000	212900000000	181270000000	177610000000	174770000000	209910000000	202640000000	156;440;441;1447;3027;3099;3453;6351;6361;7991;8489;8713;9067;10833;16863;19464;21438;21759;22383;22997;23159;23160;23396;23824;25688;27157;27376;27436;27450;27758;29890;31023;31024;31810;34641;34642;34792;34793;35051;36209;36737;36738;36899;36900;36940;37935;38636;38980;39107;39108;39723;40181;40581;40582;41731;41750;41751;42995;43569	True;True;True;True;True;True;True;True;True;True;True;True;True;True;True;True;True;True;True;True;True;True;True;True;True;True;True;True;True;True;True;True;True;True;True;True;True;True;True;True;True;True;True;True;True;True;True;True;True;True;True;True;True;True;True;True;True;True;True	167;479;480;1592;3354;3431;3808;6966;6977;8760;9309;9551;9943;11894;11895;18549;21388;23611;23985;24659;25316;25497;25498;25499;25500;25765;26222;28244;29896;30134;30199;30214;30546;33339;33340;34751;34752;35636;38751;38752;38753;38928;38929;38930;38931;39205;40445;41010;41011;41012;41181;41182;41224;42319;43079;43449;43450;43609;43610;43611;43612;44284;44782;45232;45233;45234;45235;46507;46526;4…	1777;1778;1779;1780;1781;1782;1783;1784;1785;1786;1787;1788;1789;1790;1791;1792;1793;1794;1795;1796;1797;1798;1799;1800;1801;1802;1803;1804;1805;1806;1807;1808;4727;4728;4729;4730;4731;4732;4733;4734;4735;4736;4737;4738;4739;4740;4741;4742;4743;4744;4745;4746;4747;4748;4749;4750;4751;4752;4753;4754;4755;4756;4757;16164;16165;16166;16167;16168;16169;16170;16171;16172;16173;16174;16175;16176;16177;…	1297;1298;1299;1300;1301;1302;1303;1304;1305;1306;1307;1308;1309;1310;1311;1312;1313;1314;1315;1316;1317;1318;1319;1320;1321;3346;3347;3348;3349;3350;3351;3352;3353;3354;3355;3356;3357;3358;3359;3360;3361;3362;3363;3364;3365;3366;3367;3368;3369;3370;3371;3372;3373;3374;11297;11298;11299;11300;11301;11302;11303;11304;11305;11306;11307;11308;11309;11310;11311;11312;11313;11314;11315;11316;11317;113…	1301;3346;3354;11332;24463;24943;27606;51547;51636;65542;69630;71582;74121;88077;141114;164662;182004;184890;190648;195394;196699;196754;198720;202301;216674;228623;230370;230910;231060;233777;252161;262156;262167;268914;291521;291554;292801;292805;294375;303238;307382;307395;308538;308584;308831;316277;321700;324333;325268;325300;329833;333147;336550;336555;347154;347298;347299;357639;362962	2506;2507;2508;2509;2510;2511;2512;2513;2514	187;345;348;352;371;464;479;540;549
E9Q616;F7BRM2;E9Q1H8;G5E8K8;Q8R2L7;G5E8I9	E9Q616		Ahnak	214	214	214	70.1	1326200000000	191230000000	125630000000	170720000000	94962000000	74937000000	186990000000	126580000000	123880000000	54895000000	176350000000	169830000000	142770000000	170450000000	169050000000	203270000000	168910000000	174550000000	180120000000	196960000000	156260000000	636;713;714;832;833;834;975;1232;2781;2783;2802;2906;3376;4728;5260;6021;8993;9069;9978;11502;12519;12560;12578;12579;12800;13168;13438;13480;13587;13588;13589;13591;13670;13671;14120;14421;14430;14434;14435;14437;14438;14467;14468;14526;14566;14567;14569;14570;14571;14577;14669;14682;14684;14689;14690;14691;14692;14693;14694;14712;14713;14882;14883;15209;15264;15297;15298;15433;15772;16291;16311…	True;True;True;True;True;True;True;True;True;True;True;True;True;True;True;True;True;True;True;True;True;True;True;True;True;True;True;True;True;True;True;True;True;True;True;True;True;True;True;True;True;True;True;True;True;True;True;True;True;True;True;True;True;True;True;True;True;True;True;True;True;True;True;True;True;True;True;True;True;True;True;True;True;True;True;True;True;True;True;True…	704;790;791;915;916;917;1073;1074;1352;3093;3095;3116;3229;3727;5203;5776;5777;6607;6608;9860;9945;9946;10931;12604;13711;13712;13758;13779;13780;14016;14450;14741;14789;14790;14904;14905;14906;14907;14908;14910;14911;15000;15001;15498;15829;15840;15844;15845;15847;15848;15877;15878;15879;15880;15881;15949;15991;15992;15995;15996;15997;15998;16005;16108;16122;16124;16130;16131;16132;16133;16134;1…	7125;7126;7127;7128;7129;7130;7893;7894;7895;7896;7897;7898;7899;7900;7901;7902;7903;7904;7905;7906;7907;7908;7909;7910;7911;7912;7913;9283;9284;9285;9286;9287;9288;9289;9290;9291;9292;9293;9294;9295;9296;9297;9298;9299;9300;9301;9302;9303;9304;9305;9306;9307;9308;9309;9310;9311;9312;9313;9314;9315;9316;9317;9318;9319;9320;9321;9322;9323;9324;9325;9326;9327;9328;9329;9330;9331;9332;9333;11022;110…	5054;5574;5575;5576;5577;5578;5579;5580;5581;5582;5583;5584;5585;5586;5587;6471;6472;6473;6474;6475;6476;6477;6478;6479;6480;6481;6482;6483;6484;6485;6486;6487;6488;6489;6490;6491;6492;6493;6494;6495;6496;6497;6498;6499;6500;6501;6502;6503;6504;6505;6506;6507;6508;6509;6510;6511;6512;6513;6514;6515;7685;7686;7687;7688;7689;7690;7691;7692;7693;7694;7695;7696;7697;7698;7699;7700;7701;7702;7703;7704…	5054;5581;5584;6471;6483;6515;7693;9701;22389;22408;22494;23522;27155;38104;42334;48802;73596;74155;81628;92667;101396;101647;101811;101820;103532;106785;109061;109521;110227;110257;110272;110295;111015;111019;114957;117536;117566;117585;117586;117596;117600;117754;117759;118400;118834;118842;118863;118887;118891;118948;119758;119924;119950;119979;119988;120000;120010;120027;120029;120233;120234;…	772;773;774;775;776;777;778;779;780;781;782;783;784;785;786;787;788;789;790;791;792;793;794;795;796;797;798;799;800;801;802;803;804;805;806;807;808;809;810;811;812;813;814;815;816;817;818;819;820;821;822;823;824;825;826;827;828;829;830;831;832;833;834;835;836;837;838;839;840;841;842;843;844	39;78;182;403;499;508;577;616;674;807;810;819;874;886;896;935;938;947;954;967;1007;1021;1056;1059;1135;1184;1187;1196;1203;1212;1263;1322;1359;1366;1448;1574;1688;1691;1700;1783;1787;1895;1918;2372;2406;2439;2839;2949;3011;3018;3023;3133;3145;3948;4025;4083;4227;4239;4299;4617;4629;4684;4738;4868;4918;5028;5039;5051;5074;5084;5127;5232;5274
P52480	P52480	Pyruvate kinase PKM	Pkm	41	41	5	78.7	1193000000000	164470000000	154150000000	154940000000	88435000000	59142000000	169880000000	94178000000	94955000000	42598000000	170260000000	153990000000	177210000000	155910000000	155810000000	155600000000	176370000000	127900000000	138600000000	142490000000	162270000000	95;96;838;1356;2837;4323;4335;5134;8037;8038;8285;8286;12108;12567;12568;14086;14447;14582;14591;15496;16858;16859;17366;19658;21810;22279;22440;22441;23240;23634;26462;29868;31899;32789;32882;33505;35837;36237;38073;45893;47126	True;True;True;True;True;True;True;True;True;True;True;True;True;True;True;True;True;True;True;True;True;True;True;True;True;True;True;True;True;True;True;True;True;True;True;True;True;True;True;True;True	101;102;923;924;1492;1493;1494;3154;4759;4773;5638;8815;8816;9087;9088;13263;13264;13765;13766;13767;13768;15461;15857;16010;16011;16020;17020;18544;18545;19089;21594;24042;24043;24552;24718;24719;24720;25598;26019;29130;33302;33303;35732;36712;36713;36714;36817;36818;36819;37506;37507;37508;40049;40050;40475;42472;51168;51169;52517	935;936;937;938;939;940;941;942;943;944;945;946;947;948;949;950;951;952;953;954;955;956;957;958;959;9370;9371;9372;9373;9374;9375;9376;9377;9378;9379;9380;9381;9382;9383;9384;9385;9386;9387;9388;9389;9390;9391;9392;9393;9394;9395;9396;9397;9398;9399;9400;9401;9402;9403;9404;9405;9406;9407;9408;9409;9410;9411;9412;9413;9414;9415;9416;9417;9418;9419;9420;9421;9422;9423;9424;9425;9426;9427;9428;9429…	686;687;688;689;690;691;692;693;694;695;696;697;698;6545;6546;6547;6548;6549;6550;6551;6552;6553;6554;6555;6556;6557;6558;6559;6560;6561;6562;6563;6564;6565;6566;6567;6568;6569;6570;6571;6572;6573;6574;6575;6576;6577;6578;6579;6580;6581;6582;6583;6584;6585;6586;6587;6588;6589;6590;6591;6592;6593;6594;6595;6596;6597;6598;6599;6600;6601;6602;6603;6604;6605;6606;6607;6608;6609;6610;6611;6612;6613;66…	686;691;6607;10616;22716;34886;34940;41269;65928;65952;68004;68024;97706;101691;101729;114677;117666;118998;119046;128035;141079;141087;144872;166238;185343;189846;191077;191085;197499;200845;222710;251855;269877;277508;278208;283268;300142;303444;317317;383549;393748	2583;2584;2585;2586;2587;2588;2589;2590;2591;2592;2593;2594	22;30;69;149;239;291;330;334;360;377;494;525
Q3U962;E9QAU6	Q3U962	Collagen alpha-2(V) chain	Col5a2	80	79	76	76.6	1189100000000	210550000000	195420000000	179560000000	113030000000	86345000000	111190000000	80655000000	67086000000	39262000000	105960000000	193640000000	207090000000	174980000000	192390000000	238550000000	112250000000	115320000000	89830000000	147040000000	104460000000	1260;5671;5672;5697;5698;6250;9205;9214;13496;14106;14155;14370;14482;14486;14487;14496;14520;14612;14613;14760;14780;14782;14785;14809;14846;15036;15051;15094;15260;15627;15942;16025;16060;16093;16126;16231;16285;16322;16323;16324;16326;16467;16468;16469;16487;16488;16489;16542;16554;16558;16672;16762;16903;16946;16958;17149;19512;24847;24851;26776;30790;31960;32540;32590;32677;32690;33343;33575…	True;True;True;True;True;True;True;True;True;True;True;True;True;True;True;True;True;True;True;True;True;True;True;True;True;True;True;True;True;True;True;True;True;True;True;True;True;True;True;True;True;True;True;True;True;True;True;True;False;True;True;True;True;True;True;True;True;True;True;True;True;True;True;True;True;True;True;True;True;True;True;True;True;True;True;True;True;True;True;True	1384;6223;6224;6252;6253;6857;10096;10106;14809;15483;15535;15770;15897;15901;15902;15911;15912;15942;16043;16044;16045;16046;16219;16241;16243;16247;16273;16314;16529;16545;16589;16770;17165;17166;17499;17586;17624;17658;17659;17712;17713;17843;17844;17907;17945;17946;17947;17950;18108;18109;18110;18132;18133;18134;18135;18136;18137;18138;18197;18209;18214;18340;18440;18591;18640;18641;18653;188…	14097;14098;14099;14100;14101;14102;14103;14104;14105;14106;14107;14108;14109;64578;64579;64580;64581;64582;64583;64584;64819;64820;64821;64822;64823;64824;64825;64826;64827;64828;64829;64830;64831;64832;64833;64834;64835;64836;64837;64838;64839;64840;64841;64842;64843;64844;64845;64846;64847;64848;64849;64850;64851;64852;64853;64854;64855;64856;64857;64858;64859;64860;64861;64862;64863;64864;648…	9864;9865;9866;9867;9868;9869;9870;9871;9872;9873;9874;9875;9876;45383;45384;45385;45386;45562;45563;45564;45565;45566;45567;45568;45569;45570;45571;45572;45573;45574;45575;45576;45577;45578;45579;45580;45581;45582;45583;45584;45585;45586;45587;45588;45589;45590;45591;45592;45593;45594;45595;45596;45597;45598;45599;45600;45601;45602;45603;45604;45605;45606;45607;45608;45609;45610;45611;45612;4561…	9872;45383;45386;45584;45601;50604;75447;75518;109657;114844;115213;116897;117876;117913;117929;117984;118187;119289;119305;121038;121274;121300;121406;121901;122221;124179;124432;124923;126123;129228;131873;132715;133157;133420;133784;134737;135375;135687;135688;135701;135755;137634;137650;137655;137821;137847;137884;138404;138507;138551;139630;140278;141416;141900;142056;143371;164967;210103;21…	3449;3450;3451;3452;3453;3454;3455;3456;3457;3458;3459;3460;3461;3462;3463;3464;3465;3466	185;193;209;246;327;330;366;383;516;731;761;995;1004;1280;1328;1364;1385;1497
P63017;Q504P4;D3Z5E2;D3YW43	P63017;Q504P4	Heat shock cognate 71 kDa protein	Hspa8	42	42	27	75.1	1177700000000	149150000000	119230000000	144210000000	82729000000	41427000000	172240000000	110390000000	127180000000	53436000000	177700000000	138850000000	140340000000	154320000000	152310000000	119890000000	154700000000	150960000000	173190000000	180900000000	157920000000	3197;4646;5029;6893;8639;9397;12101;12236;12277;16302;17101;17385;18965;18966;20316;20317;21807;25218;26053;30103;30116;31685;31686;31792;31953;32063;35245;35835;36547;36902;37677;37923;38386;39495;39916;41999;42831;43096;43672;44040;46393;48810	True;True;True;True;True;True;True;True;True;True;True;True;True;True;True;True;True;True;True;True;True;True;True;True;True;True;True;True;True;True;True;True;True;True;True;True;True;True;True;True;True;True	3535;5111;5526;7589;9472;10309;13255;13256;13403;13448;17925;18805;19111;20845;20846;20847;20848;22324;22325;24039;27736;28633;33685;33686;33709;33710;35507;35508;35509;35617;35618;35789;35918;39414;40046;40047;40804;41184;42041;42042;42305;42306;42815;44036;44493;46800;47774;48067;48693;49098;51716;54339	36769;36770;36771;36772;36773;36774;36775;36776;36777;36778;36779;36780;36781;36782;36783;36784;36785;36786;36787;36788;36789;36790;36791;36792;36793;36794;36795;36796;53381;53382;53383;53384;53385;53386;53387;53388;53389;53390;57672;57673;57674;57675;57676;57677;57678;57679;57680;57681;57682;57683;57684;57685;57686;57687;57688;57689;57690;57691;57692;57693;57694;57695;57696;57697;57698;57699;577…	25660;25661;25662;25663;25664;25665;25666;25667;25668;25669;25670;25671;25672;25673;25674;25675;25676;25677;25678;25679;25680;25681;25682;25683;25684;25685;25686;25687;25688;25689;25690;25691;25692;25693;25694;25695;37349;37350;37351;37352;37353;37354;37355;37356;37357;40400;40401;40402;40403;40404;40405;40406;40407;40408;40409;40410;40411;40412;40413;40414;40415;40416;40417;40418;40419;40420;404…	25688;37349;40430;56265;71026;77159;97632;98752;99058;135501;143039;145034;160817;160929;171740;171787;185316;213131;219467;254248;254516;267849;267877;268779;270239;271107;295707;300057;305684;308600;314494;316175;319714;328006;331079;349304;356463;358888;363925;367082;387543;406942	2896;2897;2898;2899;2900;2901;2902;2903	61;87;93;122;237;410;518;549
P57780	P57780	Alpha-actinin-4	Actn4	73	73	23	79.5	1176600000000	187200000000	157690000000	180740000000	77580000000	47558000000	163470000000	103460000000	84978000000	32351000000	141610000000	163720000000	177310000000	176630000000	154220000000	146280000000	146910000000	149320000000	128920000000	136450000000	127740000000	501;502;1479;1480;1792;2006;3317;3360;4746;5302;5745;5934;6533;7881;8136;9179;10064;11330;11937;15601;17560;17561;17825;17826;18697;18833;19078;19274;19275;20895;21573;22328;22477;23305;23306;23628;23886;23887;24160;26359;26360;26361;27651;27727;28639;29067;29580;30027;30126;30636;30637;32091;32293;33324;34052;34507;35021;35046;35667;35790;36897;37897;38466;40025;41179;41566;41583;41584;41590;441…	True;True;True;True;True;True;True;True;True;True;True;True;True;True;True;True;True;True;True;True;True;True;True;True;True;True;True;True;True;True;True;True;True;True;True;True;True;True;True;True;True;True;True;True;True;True;True;True;True;True;True;True;True;True;True;True;True;True;True;True;True;True;True;True;True;True;True;True;True;True;True;True;True	550;551;1629;1630;1982;1983;2216;3661;3708;5223;5823;6307;6516;7155;8643;8923;10063;11027;12417;13079;17136;17137;19296;19297;19587;19588;20552;20701;20702;20969;21182;21183;23001;23002;23003;23761;23762;24602;24758;25669;25670;26013;26290;26291;26593;28985;28986;28987;28988;28989;30433;30513;30514;31499;31992;31993;32820;32821;33562;33727;33728;34322;34323;35952;36170;36171;37315;38114;38115;386…	5509;5510;5511;5512;5513;5514;5515;5516;5517;5518;5519;5520;5521;5522;5523;5524;5525;5526;5527;5528;5529;5530;5531;5532;5533;5534;5535;5536;5537;5538;5539;5540;5541;5542;5543;5544;5545;5546;5547;5548;5549;5550;5551;5552;5553;5554;5555;16545;16546;16547;16548;16549;16550;16551;16552;16553;16554;16555;16556;16557;16558;16559;16560;16561;16562;16563;16564;16565;16566;16567;16568;16569;16570;16571;16…	3943;3944;3945;3946;3947;3948;3949;3950;3951;3952;3953;3954;3955;3956;3957;3958;3959;3960;3961;3962;3963;3964;3965;3966;3967;3968;3969;3970;3971;3972;3973;3974;3975;3976;3977;3978;3979;3980;3981;3982;11537;11538;11539;11540;11541;11542;11543;11544;11545;11546;11547;11548;11549;11550;11551;11552;11553;11554;11555;11556;11557;11558;11559;11560;11561;11562;11563;11564;11565;11566;11567;14194;14195;1…	3954;3957;11543;11560;14222;15946;26547;26959;38257;42664;46114;47950;52900;64696;66836;75082;82323;91484;96151;128949;146794;146808;149211;149259;157868;159269;161770;163285;163299;177134;183172;190257;191333;198045;198080;200800;202777;202783;204799;221817;221826;221843;232919;233599;240628;244006;249099;253541;254693;258661;258679;271653;273445;281836;287498;290663;294172;294362;298654;299637;…	3;11;15;491;725;726;727;728;1242;2670;2671;2672;2673;2674;2675	86;146;241;259;296;329;374;380;661;680;730;768;816;836;884
P17742;E9Q1E3;F8VPN3	P17742;E9Q1E3	Peptidyl-prolyl cis-trans isomerase A;Peptidyl-prolyl cis-trans isomerase A, N-terminally processed	Ppia	16	16	16	82.9	1114400000000	165020000000	154510000000	146800000000	93556000000	72956000000	136660000000	93119000000	78341000000	51405000000	122040000000	126570000000	139330000000	120800000000	126690000000	142160000000	98757000000	100640000000	91046000000	95655000000	86756000000	2444;9195;12221;18809;18941;20330;21806;22526;30106;38486;40532;41049;45929;45930;46556;46557	True;True;True;True;True;True;True;True;True;True;True;True;True;True;True;True	2690;10082;10083;10084;13388;20673;20674;20819;22338;22339;24038;24813;33690;33691;33692;33693;42923;45178;45751;51210;51211;51212;51213;51895;51896	27911;27912;27913;27914;27915;27916;27917;27918;27919;27920;27921;27922;27923;27924;27925;27926;27927;27928;27929;105300;105301;105302;105303;105304;105305;105306;105307;105308;105309;105310;105311;105312;105313;105314;105315;105316;105317;105318;105319;105320;105321;105322;105323;105324;105325;105326;105327;105328;105329;105330;105331;105332;105333;105334;105335;105336;105337;105338;105339;10534…	19617;19618;19619;19620;19621;19622;19623;75170;75171;75172;75173;75174;75175;75176;75177;75178;75179;75180;75181;75182;75183;75184;75185;75186;75187;75188;75189;75190;75191;75192;75193;75194;75195;75196;75197;75198;75199;75200;75201;75202;75203;75204;75205;75206;75207;75208;75209;75210;75211;75212;75213;75214;75215;75216;75217;75218;75219;75220;75221;75222;75223;75224;75225;75226;75227;75228;752…	19618;75354;98580;158936;160313;172017;185311;191847;254391;320542;336001;340545;383803;383909;388686;388761	2093;2094;2095;2096;2097	1;61;100;136;142
Q9QXS1;Q9QXS1-2;E9QPE8;E9QN87	Q9QXS1;Q9QXS1-2;E9QPE8;E9QN87	Plectin	Plec	317	317	10	67.1	1098400000000	163830000000	126430000000	146130000000	84074000000	52784000000	153210000000	93345000000	98179000000	38385000000	141990000000	158090000000	147200000000	151390000000	159220000000	161610000000	151750000000	141930000000	156290000000	167610000000	149610000000	104;105;211;742;800;884;980;1008;1051;1398;1475;1498;1520;1534;1904;1918;2243;2360;2520;2630;2631;2666;2944;2957;2958;2959;2960;3062;3122;3125;3153;3175;3182;3207;3215;3231;3304;4081;4082;4345;4523;4770;5085;5300;5725;5828;6555;6556;7065;7066;7067;7505;7877;8046;8063;8126;8127;8247;8620;8621;8628;9274;9575;9678;9704;9923;10020;10125;10186;10309;10310;10450;10626;10738;10745;10830;10871;10891;1094…	True;True;True;True;True;True;True;True;True;True;True;True;True;True;True;True;True;True;True;True;True;True;True;True;True;True;True;True;True;True;True;True;True;True;True;True;True;True;True;True;True;True;True;True;True;True;True;True;True;True;True;True;True;True;True;True;True;True;True;True;True;True;True;True;True;True;True;True;True;True;True;True;True;True;True;True;True;True;True;True…	110;111;230;820;882;974;1079;1110;1158;1540;1622;1623;1649;1674;1691;2108;2122;2470;2597;2775;2927;2928;2929;2969;3268;3281;3282;3283;3284;3389;3454;3457;3489;3513;3520;3545;3553;3571;3648;4498;4499;4500;4783;4975;5247;5587;5820;6286;6400;7179;7180;7775;7776;7777;7778;7779;8242;8639;8825;8844;8913;8914;9046;9449;9450;9459;9460;10171;10503;10614;10640;10874;10980;10981;11092;11155;11325;11326;1132…	1014;1015;1016;1017;1018;1019;1020;1021;1022;1023;1024;1025;1026;1027;1028;1029;1030;2386;2387;2388;2389;2390;2391;2392;2393;2394;2395;2396;2397;2398;2399;2400;2401;2402;2403;2404;2405;8332;8333;8334;8955;8956;8957;8958;8959;8960;8961;8962;8963;8964;9985;9986;9987;9988;9989;9990;9991;9992;9993;9994;9995;9996;9997;9998;9999;10000;11082;11083;11084;11085;11086;11361;11362;11363;11364;11365;11366;11…	732;733;734;735;736;737;738;739;1714;1715;1716;1717;1718;1719;1720;1721;1722;1723;1724;1725;1726;5856;5857;5858;6242;6243;6244;6245;6246;6966;6967;6968;6969;6970;6971;6972;6973;6974;6975;6976;6977;7731;7900;7901;7902;7903;8263;8264;8265;8266;8267;8268;8269;8270;8271;8272;8273;8274;8275;8276;10953;10954;10955;10956;10957;10958;10959;10960;10961;10962;10963;10964;10965;10966;11499;11500;11501;11502…	734;738;1715;5858;6242;6968;7731;7900;8263;10958;11500;11731;11909;12107;15211;15267;17682;18840;20217;21378;21383;21578;23837;23942;23953;23959;23965;24685;25041;25054;25296;25486;25523;25717;25759;26002;26476;33099;33110;34990;36423;38435;40888;42638;45933;46976;53023;53026;57455;57475;57491;61557;64657;66071;66169;66787;66789;67747;70770;70779;70953;76068;78611;79483;79640;81290;82038;82813;83…	949;950;951;952;953;954;955;956;957;958;959;960;961;962;963;964;965;966;967;968;969;970;971;972;973;974;975;976;977;978;979;980;981;982;983;984;1002	106;319;351;410;551;706;775;807;1035;1593;1909;2073;2220;2382;2461;2498;2523;2621;2694;2697;2936;2983;3395;3519;3595;3749;3930;4017;4097;4137;4173;4249;4296;4337;4379;4442;4598
P97298;Q5ND37;B7ZC25;F6S1M4;E9PWS2;CON__Q95121	P97298	Pigment epithelium-derived factor	Serpinf1	24	24	24	62.6	1090900000000	172900000000	151290000000	164160000000	103380000000	69175000000	119040000000	86506000000	83395000000	32378000000	108680000000	168000000000	181500000000	175790000000	225450000000	225250000000	113360000000	136720000000	136870000000	102300000000	110820000000	133;1782;2568;7486;9941;10299;20781;20782;21782;22952;27285;27605;28010;28175;39666;39724;41023;41587;42805;42806;43070;43829;46126;48585	True;True;True;True;True;True;True;True;True;True;True;True;True;True;True;True;True;True;True;True;True;True;True;True	142;1970;2826;8221;10892;11308;11309;22841;22842;24012;25269;30039;30385;30816;31002;44223;44285;45723;46345;47744;47745;48035;48869;48870;51432;51433;51434;54099	1529;1530;1531;1532;1533;1534;1535;1536;1537;1538;1539;1540;1541;1542;1543;1544;1545;1546;1547;1548;1549;1550;1551;1552;1553;1554;1555;1556;1557;1558;1559;1560;1561;1562;1563;1564;1565;1566;1567;1568;1569;1570;1571;1572;1573;1574;1575;1576;1577;1578;20255;29320;29321;29322;29323;29324;29325;29326;29327;29328;29329;29330;29331;29332;29333;29334;29335;29336;29337;29338;29339;29340;29341;29342;29343…	1107;1108;1109;1110;1111;1112;1113;1114;1115;1116;1117;1118;1119;1120;1121;1122;1123;1124;1125;1126;1127;1128;1129;1130;1131;1132;1133;1134;1135;1136;1137;1138;1139;1140;1141;1142;1143;1144;1145;1146;1147;1148;1149;1150;1151;1152;1153;14109;20544;20545;20546;20547;20548;20549;20550;20551;20552;20553;20554;20555;20556;20557;20558;20559;20560;20561;20562;20563;20564;20565;20566;20567;20568;20569;20…	1126;14109;20566;61448;81398;84303;176181;176188;185138;195069;229669;232419;235569;236839;329365;329843;340299;346027;356256;356290;358396;365478;385457;404942	3119;3120;3121;3122	187;198;242;243
P11499;E9Q3D6;E9Q0C3;E9PX27;D3Z1R1	P11499	Heat shock protein HSP 90-beta	Hsp90ab1	45	45	33	67.3	1071100000000	128470000000	116700000000	125100000000	73707000000	44920000000	166240000000	102300000000	111340000000	42505000000	159800000000	121440000000	130000000000	122070000000	128100000000	143110000000	139080000000	148030000000	137480000000	163120000000	148580000000	609;646;1915;2252;2807;2808;4564;6726;6916;8518;8519;8615;9170;9926;10290;10795;13973;14935;17447;17968;18288;18479;18755;19382;19542;21470;24726;24727;28657;31511;32459;32870;35577;35578;35947;36429;36976;38490;38981;39016;41664;42018;44312;48707;48735	True;True;True;True;True;True;True;True;True;True;True;True;True;True;True;True;True;True;True;True;True;True;True;True;True;True;True;True;True;True;True;True;True;True;True;True;True;True;True;True;True;True;True;True;True	669;716;2119;2479;3121;3122;5019;7372;7616;7617;7618;7619;9344;9345;9444;10054;10877;11293;11294;11854;15336;16411;16412;19176;19746;20099;20315;20614;21299;21472;23644;27207;27208;31517;31518;35315;36349;36805;39773;39774;40164;40165;40670;41263;41264;42927;43451;43488;46431;46820;46821;49399;49400;54231;54232;54260	6593;6594;6595;6596;6597;6598;6599;6600;6601;6602;6603;6604;6605;6606;6607;7236;7237;7238;7239;7240;7241;7242;7243;7244;7245;7246;7247;7248;7249;7250;7251;7252;7253;7254;7255;7256;7257;7258;7259;7260;7261;7262;7263;7264;21864;21865;21866;21867;21868;21869;21870;25342;25343;25344;25345;25346;25347;25348;25349;25350;25351;25352;25353;25354;25355;25356;25357;25358;25359;25360;25361;25362;25363;25364…	4704;4705;4706;4707;4708;4709;4710;4711;4712;4713;4714;4715;4716;5129;5130;5131;5132;5133;5134;5135;5136;5137;5138;5139;5140;5141;5142;5143;5144;5145;5146;5147;5148;5149;5150;5151;5152;5153;5154;5155;5156;5157;5158;5159;5160;15256;17742;17743;17744;17745;17746;17747;17748;17749;17750;17751;17752;17753;17754;17755;17756;17757;17758;17759;17760;17761;17762;17763;17764;17765;17766;17767;17768;17769;…	4707;5132;15256;17760;22542;22556;36795;54521;56430;69886;69896;70731;75043;81309;84217;87848;113800;123049;145993;150777;153920;155558;158422;164114;165217;182245;209300;209308;240914;266466;274793;278080;298035;298060;301061;304948;309064;320604;324356;324567;346687;349603;369995;405786;406305	1786;1936;1937;1938;1939;1940;1941;1942;1943	93;363;394;466;513;602;617;620;621
F8WID5	F8WID5		Tpm1	33	33	1	60.1	1059400000000	150960000000	118760000000	129890000000	91772000000	60652000000	141990000000	96530000000	80938000000	49040000000	138890000000	144340000000	125710000000	135380000000	146040000000	167090000000	126860000000	148050000000	121400000000	145810000000	151840000000	78;773;804;914;948;949;3545;3546;4284;7275;8467;8774;10328;10329;17043;18142;18143;18144;21314;21315;22320;22321;22933;23339;23885;28452;28453;28454;36170;36171;38281;38594;43097	True;True;True;True;True;True;True;True;True;True;True;True;True;True;True;True;True;True;True;True;True;True;True;True;True;True;True;True;True;True;True;True;True	84;851;886;1007;1045;1046;3914;3915;4716;7996;9283;9622;9623;9624;9625;11355;11356;18746;19935;19936;19937;23479;23480;24593;24594;25248;25704;26289;31294;31295;31296;40404;40405;42700;43036;48068	825;826;8644;8645;8646;8647;8648;8649;8650;8651;8652;8653;8997;8998;8999;9000;9001;9002;9003;9004;9005;9006;9007;9008;9009;9010;9011;9012;10370;10371;10372;10373;10374;10375;10376;10377;10378;10379;10783;10784;10785;10786;10787;10788;40639;40640;40641;40642;40643;40644;40645;40646;40647;40648;40649;40650;40651;40652;40653;40654;40655;40656;40657;40658;40659;40660;40661;40662;40663;40664;40665;406…	610;611;612;613;6043;6044;6045;6046;6276;6277;6278;6279;6280;6281;6282;7254;7255;7256;7257;7258;7259;7535;7536;7537;28364;28365;28366;28367;28368;28369;28370;28371;28372;28373;28374;28375;28376;28377;28378;28379;28380;28381;28382;28383;28384;28385;28386;28387;28388;28389;28390;28391;28392;28393;28394;28395;28396;28397;28398;28399;28400;28401;28402;28403;28404;28405;28406;28407;28408;28409;28410;2…	611;6045;6277;7256;7536;7537;28374;28385;34588;59349;69442;72059;84578;84645;142661;152512;152519;152528;180766;180832;190169;190199;194938;198304;202760;238798;238870;238910;302965;302973;319022;321418;358893	340;341;342	312;315;326
P26041	P26041	Moesin	Msn	50	50	36	72.1	1029600000000	162790000000	157980000000	148400000000	73073000000	40401000000	140370000000	88163000000	67130000000	28951000000	122390000000	135430000000	161710000000	139350000000	121970000000	112550000000	118160000000	123060000000	93765000000	105690000000	99842000000	1182;2084;2085;2248;2479;2480;2773;3093;3115;3116;7261;8175;8403;9147;10915;10980;11089;11690;13867;14016;16119;16824;16825;19180;19956;20447;21386;21657;22317;22393;22426;22467;22688;22863;22906;24318;30998;34333;34512;35061;35554;35555;36147;36211;38173;40599;40601;42427;46781;47004	True;True;True;True;True;True;True;True;True;True;True;True;True;True;True;True;True;True;True;True;True;True;True;True;True;True;True;True;True;True;True;True;True;True;True;True;True;True;True;True;True;True;True;True;True;True;True;True;True;True	1295;2301;2302;2475;2729;2730;3084;3423;3424;3447;3448;7980;8963;9214;10030;11980;12049;12162;12814;15217;15384;17699;17700;18507;18508;21079;21080;21925;22465;22466;22467;23554;23871;23872;24590;24669;24703;24748;24990;24991;25176;25177;25220;26764;34724;38425;38614;39216;39217;39748;39749;40380;40381;40447;40448;42582;45255;45256;45258;45259;45260;47325;47326;52134;52380;52381	13199;13200;13201;13202;13203;13204;13205;13206;13207;13208;13209;23611;23612;23613;23614;23615;23616;23617;23618;23619;23620;23621;23622;23623;23624;23625;23626;23627;23628;23629;23630;23631;23632;23633;23634;23635;23636;23637;23638;25302;25303;25304;25305;25306;25307;25308;25309;28391;28392;28393;28394;28395;28396;28397;28398;28399;28400;28401;28402;28403;28404;28405;28406;28407;28408;28409;284…	9196;9197;9198;9199;9200;9201;9202;9203;9204;9205;9206;16482;16483;16484;16485;16486;16487;16488;16489;16490;16491;16492;16493;16494;16495;16496;16497;16498;16499;16500;16501;16502;16503;16504;17713;17714;17715;17716;17717;19913;19914;19915;19916;19917;19918;19919;19920;19921;19922;19923;19924;19925;19926;19927;19928;19929;19930;19931;19932;19933;19934;19935;19936;22318;22319;22320;22321;22322;22…	9204;16482;16491;17715;19923;19928;22323;24891;25007;25011;59182;67093;68959;74881;88610;89087;89743;94303;112870;114122;133732;140845;140856;162465;168622;173204;181474;184079;190152;190709;190967;191283;193044;194359;194711;205784;262055;289514;290706;294451;297815;297817;302772;303285;318161;336760;336870;353268;390427;392713	2225;2228;2229;2230;2231;2232;2233;2234;2235;2236;2237;2238;2239	12;182;200;285;292;305;421;433;451;467;543;549;577
E9PZ00;Q8BFQ1	E9PZ00;Q8BFQ1		Psap	33	33	1	76.8	996900000000	149560000000	130750000000	137730000000	77090000000	51274000000	121670000000	87205000000	87392000000	33887000000	120340000000	149440000000	144540000000	142810000000	140890000000	147750000000	117220000000	121120000000	100990000000	91972000000	115530000000	2661;4644;4930;6826;8405;8689;9416;11663;14347;14754;16011;17783;17784;20073;21073;22647;24844;25905;28517;28627;30751;30963;32243;32470;33798;35093;38862;40649;40686;40730;42046;43122;47064	True;True;True;True;True;True;True;True;True;True;True;True;True;True;True;True;True;True;True;True;True;True;True;True;True;True;True;True;True;True;True;True;True	2963;2964;5109;5415;5416;7515;9216;9525;10331;12784;12785;15747;16211;16212;17572;19538;19539;19540;19541;22051;23213;23214;24940;27334;28476;31361;31486;34445;34681;34682;34683;34684;36115;36116;36117;36118;36360;37839;37840;39249;43326;45312;45353;45399;46852;48097;52449;52450	30825;30826;30827;30828;30829;30830;30831;30832;30833;30834;30835;30836;30837;30838;30839;30840;30841;30842;30843;30844;53367;53368;53369;53370;53371;53372;53373;53374;53375;53376;53377;53378;56485;56486;56487;56488;56489;56490;56491;56492;56493;56494;56495;56496;56497;56498;56499;56500;56501;56502;56503;56504;56505;56506;78508;78509;78510;78511;78512;78513;96547;96548;96549;96550;96551;96552;965…	21550;21551;21552;21553;21554;21555;21556;21557;37342;37343;37344;37345;37346;37347;39576;39577;39578;39579;39580;39581;39582;39583;39584;39585;39586;39587;39588;39589;39590;39591;39592;55644;55645;55646;55647;68967;68968;68969;68970;68971;68972;68973;68974;68975;68976;68977;68978;68979;68980;71413;71414;71415;71416;71417;71418;71419;71420;71421;71422;71423;71424;71425;71426;71427;71428;71429;714…	21553;37342;39592;55646;68970;71423;77371;94113;116699;120900;132628;148893;148919;169431;178697;192673;210051;218332;239563;240507;259642;261744;273067;274854;285822;294620;323513;337257;337583;337856;350016;359091;393261	669;670;671;672;673;674;675;676;677;678;679;680;681;682	48;117;122;160;168;198;251;253;255;294;295;318;497;533
Q64727;E9Q9D0	Q64727	Vinculin	Vcl	85	85	85	80.3	919800000000	141720000000	105270000000	102690000000	69320000000	49732000000	135240000000	74716000000	86824000000	35215000000	119080000000	135170000000	123420000000	113430000000	111360000000	133390000000	128610000000	107630000000	105310000000	113250000000	113200000000	61;291;352;411;1293;1807;1971;1973;3092;3126;3283;3752;3765;4357;7921;8040;8087;9517;9990;10164;10818;11359;11360;11362;11456;14673;15535;15548;15549;16045;16166;16606;17294;17499;19070;19331;20578;20664;21171;21459;22491;22492;22563;23226;23227;23854;24576;25541;25542;27952;28585;28586;29054;29621;29923;30015;31543;31648;31691;34544;34934;35278;35548;35561;35694;35826;36481;37825;38678;38767;387…	True;True;True;True;True;True;True;True;True;True;True;True;True;True;True;True;True;True;True;True;True;True;True;True;True;True;True;True;True;True;True;True;True;True;True;True;True;True;True;True;True;True;True;True;True;True;True;True;True;True;True;True;True;True;True;True;True;True;True;True;True;True;True;True;True;True;True;True;True;True;True;True;True;True;True;True;True;True;True;True…	66;318;384;448;1418;1419;1420;1421;1999;2177;2180;3420;3421;3422;3458;3627;4140;4154;4795;8684;8819;8872;10436;10944;10945;11132;11878;12448;12449;12451;12555;16112;17062;17063;17076;17077;17609;17774;18265;18266;19008;19234;20960;21244;22610;22704;22705;23325;23633;24773;24774;24851;25578;25579;25580;25581;25582;25583;26254;27044;28091;28092;30751;31437;31438;31439;31440;31968;31969;31970;31971;…	717;718;719;720;721;722;723;3142;3143;3144;3145;3146;3147;3148;3149;3150;3151;3152;3153;3697;3698;3699;3700;3701;3702;3703;3704;3705;4405;4406;4407;4408;4409;4410;4411;14421;14422;14423;14424;14425;14426;14427;14428;14429;14430;14431;14432;14433;14434;14435;14436;14437;14438;14439;14440;14441;14442;14443;14444;14445;14446;14447;14448;14449;14450;14451;14452;14453;14454;14455;14456;14457;14458;144…	539;540;541;542;543;544;2215;2216;2217;2218;2219;2220;2574;2575;2576;2577;2578;2579;3108;3109;3110;3111;10104;10105;10106;10107;10108;10109;10110;10111;10112;10113;10114;10115;10116;10117;10118;10119;10120;10121;10122;10123;10124;10125;10126;10127;10128;10129;10130;10131;10132;10133;10134;10135;10136;10137;10138;10139;10140;10141;10142;10143;10144;10145;10146;10147;10148;10149;10150;10151;10152;1…	542;2215;2575;3111;10157;14360;15647;15655;24873;25058;26372;29833;29989;35087;65043;66054;66477;77979;81749;83003;87965;91670;91673;91675;92384;119779;128286;128377;128409;133034;134236;139081;144366;146461;161720;163698;174317;175176;179563;182153;191572;191583;192122;197345;197408;202548;207947;215630;215666;235195;240142;240158;243898;249704;252587;253398;266788;267501;267895;290859;293622;29…	3958;3959;3960;3961;3962;3963;3964;3965;3966;3967;3968;3969;3970;3971;3972;3973;3974;3975;3976;3977;3978;3979;3980;3981;3982;3983;3984;3985;3986	26;74;94;154;190;195;209;237;327;331;350;533;534;587;591;698;709;741;748;797;799;898;899;900;926;930;933;1022;1031
Q04857;E9Q7R6;E9Q3C7	Q04857	Collagen alpha-1(VI) chain	Col6a1	56	56	56	68.6	898240000000	152170000000	127140000000	132140000000	82136000000	45217000000	112650000000	58741000000	62748000000	21851000000	103450000000	143200000000	143560000000	143480000000	148060000000	133910000000	111820000000	85131000000	93044000000	85674000000	99697000000	680;1342;1650;3482;4023;4679;4990;7240;7579;7656;7657;9218;10474;10494;12288;12682;14220;14388;14390;14481;14599;14603;14604;14849;15464;15748;16325;16920;17355;17639;17640;19149;22322;22631;25472;26025;27341;27666;27667;29113;29835;31338;31490;32645;33607;35871;35872;35966;37006;40534;43603;44401;45437;46133;48918;48919	True;True;True;True;True;True;True;True;True;True;True;True;True;True;True;True;True;True;True;True;True;True;True;True;True;True;True;True;True;True;True;True;True;True;True;True;True;True;True;True;True;True;True;True;True;True;True;True;True;True;True;True;True;True;True;True	753;1478;1820;3843;4435;5144;5484;5485;7959;8319;8401;8402;10110;11507;11530;13461;13462;13891;15605;15606;15791;15793;15896;16029;16033;16034;16035;16317;16986;17291;17948;17949;18611;19076;19383;19384;19385;21044;24595;24923;28017;28604;30095;30096;30450;30451;32062;32063;33253;33254;35090;35287;36550;37625;40084;40085;40185;40186;41299;45180;48619;49496;50621;51441;54451;54452	7564;7565;7566;7567;7568;15012;15013;15014;15015;15016;15017;15018;15019;15020;15021;15022;15023;15024;15025;15026;15027;15028;15029;15030;15031;15032;15033;15034;15035;15036;15037;15038;15039;15040;15041;15042;15043;15044;15045;15046;15047;15048;15049;15050;15051;15052;15053;15054;15055;15056;15057;15058;15059;15060;18861;18862;18863;18864;18865;18866;18867;18868;18869;18870;18871;18872;18873;18…	5334;5335;5336;5337;10495;10496;10497;10498;10499;10500;10501;10502;10503;10504;10505;10506;10507;10508;10509;10510;10511;10512;10513;10514;10515;10516;10517;10518;10519;10520;10521;10522;10523;10524;10525;10526;10527;10528;10529;10530;10531;10532;10533;10534;10535;10536;10537;10538;10539;10540;10541;13131;13132;13133;13134;13135;13136;13137;13138;13139;13140;13141;13142;13143;13144;13145;13146;1…	5334;10510;13131;27860;32664;37553;40046;59036;62281;62857;62878;75532;85681;85903;99227;102684;115714;117052;117061;117875;119096;119179;119182;122245;127817;130179;135731;141667;144757;147446;147474;162246;190200;192590;215117;219204;230144;233144;233165;244490;251661;264816;266210;276346;283989;300429;300437;301283;309345;336010;363316;370939;379882;385512;407849;407886	3274;3275;3276;3277;3278;3279;3280;3281;3282;3283	105;237;299;332;504;600;602;669;675;696
P58252	P58252	Elongation factor 2	Eef2	59	59	58	74.6	883330000000	122650000000	101420000000	111760000000	62717000000	35211000000	132530000000	69168000000	80468000000	29377000000	138020000000	115280000000	114390000000	114800000000	114250000000	102250000000	126320000000	102410000000	109990000000	96847000000	113470000000	1346;2247;3223;3224;4244;4393;4631;5849;6370;6371;7459;8502;9046;9152;9153;11363;12190;13675;14695;15196;15423;16396;17403;20431;20858;20859;22151;22358;22877;26333;26334;28773;30114;31396;33514;34050;35630;35963;37487;37490;39179;39180;39181;39919;40029;41061;41355;41553;44246;44247;44391;45864;46809;47840;48418;48419;48438;49296;49541	True;True;True;True;True;True;True;True;True;True;True;True;True;True;True;True;True;True;True;True;True;True;True;True;True;True;True;True;True;True;True;True;True;True;True;True;True;True;True;True;True;True;True;True;True;True;True;True;True;True;True;True;True;True;True;True;True;True;True	1482;2474;3562;3563;4671;4835;4836;5090;6421;6986;6987;8194;9326;9918;9919;10035;10036;12452;13354;15006;16137;16699;16943;16944;18027;18028;18029;19130;22447;22448;22934;22935;22936;22937;24417;24633;25191;28942;28943;28944;28945;31645;33706;35179;35180;37517;37518;37519;38111;38112;39830;40181;40182;41834;41835;41838;43686;43687;43688;44496;44615;45764;46089;46090;46306;46307;46308;49324;49325;…	15077;25280;25281;25282;25283;25284;25285;25286;25287;25288;25289;25290;25291;25292;25293;25294;25295;25296;25297;25298;25299;25300;25301;36979;36980;36981;36982;36983;36984;36985;36986;36987;36988;36989;36990;36991;36992;36993;36994;36995;36996;36997;36998;36999;37000;37001;37002;37003;48843;48844;48845;48846;48847;48848;48849;48850;48851;48852;48853;48854;48855;48856;48857;48858;48859;48860;488…	10546;17696;17697;17698;17699;17700;17701;17702;17703;17704;17705;17706;17707;17708;17709;17710;17711;17712;25801;25802;25803;25804;25805;25806;25807;25808;25809;25810;25811;25812;25813;25814;25815;25816;25817;25818;25819;25820;25821;25822;25823;25824;25825;25826;25827;25828;25829;25830;25831;25832;25833;25834;25835;25836;25837;25838;25839;25840;25841;25842;25843;25844;25845;25846;25847;25848;342…	10546;17699;25813;25847;34249;35416;37229;47157;51728;51750;61124;69814;73982;74917;74928;91681;98370;111044;120044;125687;127534;136387;145196;173073;176778;176788;188578;190459;194490;221461;221490;241784;254495;265522;283339;287479;298446;301258;313210;313225;325759;325775;325785;331127;331947;340690;343668;345700;369376;369392;370819;383315;390915;399193;403614;403624;403735;410901;412968	2677;2678;2679;2680;2681;2682;2683;2684;2685;2686;2687;2688;2689;2690;2691;2692	22;156;157;231;305;383;395;396;430;453;454;494;533;697;741;781
P28653	P28653	Biglycan	Bgn	21	21	20	61.8	817960000000	138620000000	104200000000	103190000000	69597000000	49512000000	105330000000	58923000000	64364000000	29878000000	94338000000	118480000000	122500000000	110640000000	141230000000	164910000000	105140000000	86233000000	92689000000	113160000000	92265000000	1178;4271;4918;6615;9596;9597;9898;15982;17283;21211;21212;23145;24765;26110;27798;30868;31382;35620;44576;45986;47288	True;True;True;True;True;True;True;True;True;True;True;True;True;True;True;True;True;True;True;True;True	1291;4702;5403;7254;10525;10526;10847;17543;18997;23365;23366;25482;27247;28692;30586;34577;35150;35151;35152;39818;49679;49680;51272;52694	13163;13164;13165;13166;13167;13168;13169;49150;49151;49152;49153;49154;49155;49156;49157;49158;49159;49160;49161;49162;49163;49164;49165;49166;49167;49168;49169;49170;49171;49172;49173;49174;49175;49176;49177;49178;56365;56366;56367;56368;56369;56370;56371;56372;56373;56374;56375;56376;56377;56378;56379;75631;75632;75633;75634;75635;75636;75637;75638;75639;75640;75641;75642;75643;75644;75645;756…	9171;9172;9173;9174;9175;34441;34442;34443;34444;34445;34446;34447;34448;34449;34450;34451;34452;34453;34454;34455;34456;34457;34458;34459;34460;34461;39489;39490;39491;39492;39493;39494;53495;53496;53497;53498;53499;53500;53501;53502;53503;53504;53505;53506;53507;53508;53509;53510;53511;53512;53513;53514;53515;53516;53517;53518;53519;53520;53521;53522;53523;53524;53525;53526;53527;53528;53529;53…	9172;34454;39492;53507;78780;78851;81162;132413;144298;179844;179886;196490;209515;219902;234022;260715;265265;298357;372455;384388;395078	2310;2311;2312	186;191;324
P63101;D3YXN6;D3YXF4	P63101	14-3-3 protein zeta/delta	Ywhaz	21	21	15	79.2	800410000000	116680000000	107230000000	98581000000	64546000000	42734000000	112250000000	71863000000	59684000000	31887000000	94956000000	109480000000	115060000000	109480000000	115640000000	114330000000	95111000000	97619000000	87587000000	96829000000	86879000000	6010;6887;7441;10304;12929;15621;15622;19722;22457;23066;23068;24751;31213;31215;40323;40324;40538;47325;48238;48823;48824	True;True;True;True;True;True;True;True;True;True;True;True;True;True;True;True;True;True;True;True;True	6596;7583;8174;8175;11316;11317;14156;17159;17160;21665;24738;25391;25394;25395;25396;27233;34954;34956;44944;44945;45184;52737;53717;53718;53719;54353;54354	68997;68998;68999;69000;69001;69002;69003;69004;69005;69006;69007;69008;69009;69010;69011;69012;69013;69014;69015;69016;69017;69018;69019;69020;69021;69022;69023;69024;69025;69026;69027;69028;69029;69030;69031;69032;69033;69034;69035;79233;79234;79235;79236;79237;79238;79239;79240;79241;79242;79243;79244;79245;79246;79247;79248;79249;79250;79251;79252;79253;85426;85427;85428;85429;85430;85431;854…	48647;48648;48649;48650;48651;48652;48653;48654;48655;48656;48657;48658;48659;48660;48661;48662;48663;48664;48665;48666;48667;48668;48669;48670;48671;48672;48673;48674;48675;48676;48677;48678;48679;48680;48681;48682;48683;48684;56233;56234;56235;56236;56237;56238;56239;56240;56241;56242;56243;56244;56245;56246;56247;60796;60797;60798;60799;60800;60801;60802;60803;60804;60805;60806;60807;60808;608…	48653;56240;60803;84340;104712;129147;129175;166805;191240;195787;195830;209431;263636;263678;334319;334338;336101;395353;402121;407085;407106	1060;1061;2918;2919	22;26;160;218
P07091;D3YUT9	P07091;D3YUT9	Protein S100-A4	S100a4	7	7	7	48.5	785150000000	98917000000	86383000000	93635000000	75340000000	54709000000	99861000000	87972000000	79383000000	12001000000	96949000000	104750000000	102790000000	108980000000	126190000000	160190000000	98692000000	121560000000	98281000000	118490000000	97013000000	3225;10002;10070;29074;32906;36870;45813	True;True;True;True;True;True;True	3564;3565;10957;11033;32005;36846;41149;51067;51068	37004;37005;37006;37007;37008;37009;37010;37011;37012;37013;37014;37015;37016;37017;37018;37019;37020;37021;37022;37023;37024;37025;37026;37027;37028;37029;37030;37031;37032;37033;37034;37035;37036;37037;37038;37039;37040;37041;37042;37043;37044;37045;37046;37047;37048;37049;37050;37051;37052;37053;37054;37055;37056;37057;37058;37059;37060;37061;37062;37063;37064;37065;37066;37067;37068;37069;370…	25849;25850;25851;25852;25853;25854;25855;25856;25857;25858;25859;25860;25861;25862;25863;25864;25865;25866;25867;25868;25869;25870;25871;25872;25873;25874;25875;25876;25877;25878;25879;25880;25881;25882;25883;25884;25885;25886;25887;25888;25889;25890;25891;25892;25893;25894;25895;25896;25897;25898;25899;25900;25901;25902;25903;25904;25905;25906;25907;25908;25909;25910;25911;25912;25913;25914;259…	25860;81832;82423;244048;278433;308264;382806	1769	59
Q640N1;Q640N1-2;Q9D2L5	Q640N1;Q640N1-2	Adipocyte enhancer-binding protein 1	Aebp1	45	45	45	43.4	777090000000	140280000000	122910000000	122790000000	64076000000	44548000000	88186000000	49828000000	45650000000	20682000000	78145000000	133420000000	136070000000	129070000000	116590000000	107820000000	87156000000	75816000000	68057000000	66077000000	80991000000	1759;4713;7543;7550;8178;8557;8558;9504;9505;9976;13276;13277;13661;13730;14633;14650;15140;18037;19310;19536;20701;21413;22198;22443;24213;26036;28667;28791;31333;31536;35044;35719;36473;38142;40911;40912;42359;42360;43854;46131;46775;47809;48032;49008;49455	True;True;True;True;True;True;True;True;True;True;True;True;True;True;True;True;True;True;True;True;True;True;True;True;True;True;True;True;True;True;True;True;True;True;True;True;True;True;True;True;True;True;True;True;True	1943;1944;5186;5187;8282;8289;8966;8967;9384;9385;10422;10423;10424;10928;10929;14562;14563;14991;15066;16067;16086;16636;16637;19824;21221;21466;22754;23583;24466;24467;24722;26651;28616;31528;31529;31663;35085;35345;39198;39923;40714;42550;45597;45598;47250;47251;48898;48899;51439;52128;53247;53248;53489;54552;55051	19993;19994;19995;19996;19997;19998;19999;20000;20001;20002;20003;20004;20005;20006;20007;54189;54190;54191;54192;54193;54194;54195;54196;54197;54198;54199;54200;54201;54202;54203;54204;54205;54206;54207;54208;54209;54210;54211;54212;54213;54214;54215;54216;54217;54218;54219;54220;86777;86778;86779;86780;86781;86782;86783;86784;86785;86786;86787;86788;86834;86835;86836;86837;86838;86839;86840;868…	13960;13961;13962;13963;13964;13965;13966;13967;13968;13969;13970;13971;13972;37960;37961;37962;37963;37964;37965;37966;37967;37968;37969;37970;37971;37972;37973;37974;37975;37976;37977;37978;37979;37980;37981;37982;37983;37984;37985;37986;37987;37988;37989;37990;37991;61978;61979;61980;61981;61982;61983;61984;61985;62008;62009;62010;62011;62012;62013;62014;62015;62016;62017;62018;62019;62020;620…	13960;37976;61981;62008;67193;70277;70279;77912;77925;81609;107613;107630;110933;111490;119487;119622;125280;151446;163524;165188;175462;181711;189142;191109;205084;219365;240991;241868;264774;266719;294320;299094;305191;317834;339259;339262;352811;352829;365652;385499;390390;398931;400509;408483;412262	3928;3929;3930;3931;3932;3933;3934;3935;3936;3937	381;593;630;742;766;817;834;892;987;1002
E9QQ15;E9PYH0;G3XA35;Q62059;Q62059-2;E9QMK2;Q62059-3;E9QMK3;Q62059-4;Q8BS97;F7B603;F7B6F7;E0CZC0	E9QQ15;E9PYH0;G3XA35;Q62059;Q62059-2;E9QMK2	Versican core protein	Vcan	70	70	70	25.8	757470000000	136410000000	132530000000	123160000000	65529000000	37850000000	78897000000	58332000000	45401000000	17830000000	61531000000	125070000000	141330000000	119480000000	114750000000	109220000000	70062000000	72179000000	61151000000	67551000000	61357000000	2972;3279;3575;4360;4550;5950;6397;6442;6911;6951;8599;8835;8836;9059;10236;11248;11342;11436;11504;12095;12096;12632;13260;13719;16772;17172;18593;19826;21732;22471;22830;23361;24169;25671;27100;27364;28797;29231;29340;29359;30702;30742;30943;30944;32944;33032;33283;33579;34361;35747;36929;38240;38304;39356;39370;40228;40345;40988;41855;42420;42759;43144;44398;44556;44784;46733;47942;47981;48366…	True;True;True;True;True;True;True;True;True;True;True;True;True;True;True;True;True;True;True;True;True;True;True;True;True;True;True;True;True;True;True;True;True;True;True;True;True;True;True;True;True;True;True;True;True;True;True;True;True;True;True;True;True;True;True;True;True;True;True;True;True;True;True;True;True;True;True;True;True;True	3296;3623;3949;4798;4799;5003;6533;6534;7015;7060;7608;7655;9427;9690;9691;9692;9934;9935;11206;11207;12333;12430;12532;12606;13249;13250;13837;14546;15054;18450;18880;20440;21781;23956;23957;24752;25142;25727;26603;28227;29836;29837;30121;31669;32252;32421;32449;32450;34395;34436;34660;34661;36886;36982;37273;37594;38453;38454;39954;41213;42654;42725;43888;43905;44831;44832;44969;45686;45687;466…	34378;34379;34380;34381;34382;34383;34384;34385;34386;34387;34388;34389;34390;34391;34392;37742;37743;37744;37745;37746;37747;37748;37749;37750;40949;50137;50138;50139;50140;50141;50142;50143;50144;50145;50146;50147;50148;50149;50150;50151;50152;50153;52417;52418;52419;52420;52421;52422;52423;52424;52425;52426;52427;52428;52429;52430;52431;52432;52433;52434;52435;52436;52437;52438;68195;68196;681…	24052;24053;24054;24055;24056;24057;24058;24059;24060;24061;24062;24063;24064;24065;26359;26360;26361;26362;26363;26364;28586;35101;35102;35103;35104;35105;35106;35107;35108;35109;35110;35111;35112;36684;36685;36686;36687;36688;36689;36690;36691;36692;36693;36694;36695;36696;36697;36698;36699;48121;48122;48123;48124;48125;48126;48127;48128;48129;48130;48131;48132;48133;48134;48135;48136;48137;481…	24052;26359;28586;35107;36696;48142;51935;52348;56377;56651;70618;72538;72551;74057;83456;91000;91569;92240;92677;97567;97570;102345;107456;111363;140328;143535;156728;167525;184679;191309;194133;198461;204877;216589;228229;230254;241925;245695;246769;246967;259141;259567;261477;261503;278705;279431;281515;283769;289692;299343;308768;318688;319186;327004;327102;333454;334529;340083;348059;353195;…	649;650;651;652;653;654;655;656;657;658;659;660;661;662	117;133;143;221;222;1756;1926;2193;2259;2860;2909;3171;3189;3310
P09103;E9Q8G8	P09103	Protein disulfide-isomerase	P4hb	36	36	36	70.9	754050000000	108090000000	99316000000	89544000000	51039000000	30476000000	120730000000	72705000000	57589000000	24523000000	100040000000	101620000000	101360000000	91137000000	94550000000	96576000000	117160000000	115850000000	90946000000	89217000000	101450000000	839;1964;5905;5929;7648;8023;8594;12107;12385;18514;19793;20429;20516;20564;21749;22361;22401;25403;29202;31426;32013;32776;34091;34464;36888;39115;40300;41302;41413;41717;42976;43704;44807;45691;48815;48947	True;True;True;True;True;True;True;True;True;True;True;True;True;True;True;True;True;True;True;True;True;True;True;True;True;True;True;True;True;True;True;True;True;True;True;True	925;2170;6482;6508;8393;8798;9422;13262;13566;20354;21745;22444;22445;22546;22596;23975;24636;24677;27941;27942;32205;32206;35217;35863;36695;36696;38156;38564;41168;43620;44921;46029;46151;46491;47928;48732;49931;50905;54345;54484	9464;9465;9466;9467;9468;9469;9470;9471;9472;9473;9474;9475;9476;9477;9478;9479;9480;9481;9482;22378;67541;67542;67543;67544;67545;67546;67547;67548;67549;67550;67551;67552;67553;67554;67555;67556;67818;67819;67820;67821;67822;67823;67824;67825;67826;67827;67828;67829;67830;67831;67832;67833;67834;67835;67836;67837;67838;67839;67840;67841;67842;87904;87905;87906;87907;87908;87909;92041;92042;9204…	6625;6626;6627;6628;15609;47663;47664;47665;47666;47667;47668;47669;47670;47671;47672;47849;47850;47851;47852;47853;47854;47855;47856;47857;47858;47859;47860;47861;47862;47863;47864;47865;47866;47867;47868;47869;47870;47871;47872;47873;47874;47875;47876;47877;47878;47879;62804;62805;62806;62807;62808;62809;65752;65753;65754;65755;65756;65757;65758;65759;65760;65761;65762;65763;65764;65765;65766;6…	6627;15609;47663;47874;62806;65754;70586;97684;100023;155837;167349;173053;173863;174182;184818;190472;190753;214599;245408;265775;270694;277355;287816;290361;308410;325368;334167;343055;344222;347066;357477;364205;374681;381793;406999;408071	1852;1853;1854	326;358;427
P21460;A2APX3	P21460;A2APX3	Cystatin-C	Cst3	12	12	12	65.7	746670000000	120370000000	114660000000	114350000000	84122000000	45387000000	84170000000	48787000000	44364000000	23124000000	67344000000	83095000000	90036000000	84943000000	114450000000	105920000000	59189000000	53100000000	51704000000	55903000000	51750000000	1995;1996;2004;16902;17086;29612;29613;29614;34716;35549;39566;39567	True;True;True;True;True;True;True;True;True;True;True;True	2205;2206;2214;18590;18790;32876;32877;32878;32879;32880;38833;38834;39743;44118;44119;44120	22652;22653;22654;22655;22656;22657;22658;22659;22660;22661;22662;22663;22664;22665;22666;22667;22668;22669;22670;22671;22672;22673;22674;22675;22676;22677;22678;22679;22740;22741;22742;22743;22744;22745;22746;22747;22748;22749;22750;22751;22752;22753;22754;22755;22756;22757;22758;22759;22760;22761;22762;22763;22764;22765;22766;22767;22768;22769;22770;22771;22772;22773;22774;22775;22776;22777;227…	15801;15802;15803;15804;15805;15806;15807;15808;15809;15810;15811;15812;15813;15814;15815;15816;15817;15818;15819;15820;15821;15863;15864;15865;15866;15867;15868;15869;15870;15871;15872;15873;15874;15875;15876;15877;15878;15879;15880;15881;15882;15883;15884;15885;15886;15887;15888;15889;15890;15891;15892;15893;15894;15895;15896;15897;15898;15899;15900;15901;15902;15903;15904;15905;15906;15907;159…	15803;15821;15879;141412;142921;249455;249560;249604;292041;297791;328645;328693	2168;2169;2170	29;88;112
P14069	P14069	Protein S100-A6	S100a6	7	7	7	74.2	746350000000	120990000000	84981000000	77532000000	49481000000	32645000000	107430000000	77103000000	85635000000	10979000000	99577000000	99370000000	74070000000	76210000000	71277000000	112340000000	86090000000	93516000000	76558000000	37075000000	81258000000	514;7090;10158;26310;26311;27002;27003	True;True;True;True;True;True;True	563;564;7803;11126;28906;28907;28908;28909;29728;29729	5654;5655;5656;5657;5658;5659;5660;5661;5662;5663;5664;5665;5666;5667;5668;5669;5670;5671;5672;5673;5674;5675;5676;5677;5678;5679;5680;5681;5682;5683;5684;5685;5686;5687;5688;5689;5690;5691;5692;5693;5694;5695;5696;5697;5698;5699;5700;5701;81293;81294;81295;81296;81297;81298;81299;81300;81301;81302;81303;81304;81305;81306;81307;81308;81309;81310;81311;81312;81313;81314;81315;81316;81317;81318;813…	4053;4054;4055;4056;4057;4058;4059;4060;4061;4062;4063;4064;4065;4066;4067;4068;4069;4070;4071;4072;4073;4074;4075;4076;4077;4078;4079;57706;57707;57708;57709;57710;57711;57712;57713;57714;57715;57716;57717;57718;57719;57720;57721;57722;57723;57724;57725;57726;57727;57728;57729;57730;57731;57732;57733;57734;57735;57736;57737;57738;57739;57740;57741;57742;57743;57744;57745;57746;57747;57748;57749;…	4077;57739;82971;221118;221264;227408;227415	1987	57
Q62009;Q62009-3;Q62009-4;CON__Q2KJC7	Q62009;Q62009-3;Q62009-4	Periostin	Postn	43	43	2	64.3	737080000000	128870000000	102820000000	104440000000	63102000000	43999000000	93477000000	46237000000	49020000000	19535000000	85576000000	132680000000	120420000000	112110000000	110780000000	133230000000	90585000000	61490000000	70921000000	64478000000	86256000000	40;5721;6568;7103;9091;9092;9554;9967;10972;12691;13567;14340;14932;15764;15765;16142;16143;16725;17007;17008;18053;20220;21288;21680;25294;26289;27396;30288;30697;30823;32173;35030;35314;35896;35979;36374;40559;42866;43528;44613;44927;45025;45658	True;True;True;True;True;True;True;True;True;True;True;True;True;True;True;True;True;True;True;True;True;True;True;True;True;True;True;True;True;True;True;True;True;True;True;True;True;True;True;True;True;True;True	44;6280;7192;7816;9970;9971;10481;10482;10919;12040;12041;13900;14883;15739;15740;16408;17309;17310;17311;17736;17737;17738;18401;18708;18709;19841;19842;19843;22215;23451;23898;27818;28882;30156;33938;34389;34525;36038;39184;39489;40110;40199;40200;40613;45207;45208;47810;47811;48538;49718;50062;50177;50865	477;478;479;480;481;482;483;484;485;486;487;488;489;490;491;492;493;494;495;496;497;498;499;500;501;502;503;65122;65123;65124;65125;65126;65127;65128;65129;65130;65131;65132;65133;65134;65135;65136;65137;65138;65139;65140;65141;65142;65143;65144;65145;65146;65147;65148;65149;65150;65151;65152;65153;65154;65155;65156;65157;65158;65159;65160;65161;65162;65163;75063;75064;75065;75066;75067;75068;750…	336;337;338;339;340;341;342;343;344;345;346;347;348;349;350;351;352;353;354;355;356;357;358;359;360;361;362;363;45836;45837;45838;45839;45840;45841;45842;45843;45844;45845;45846;45847;45848;45849;45850;45851;45852;45853;45854;45855;45856;45857;45858;45859;45860;45861;45862;45863;45864;45865;45866;45867;45868;45869;45870;45871;45872;45873;45874;45875;45876;45877;45878;45879;45880;53118;53119;53120…	337;45874;53122;57858;74411;74432;78508;81569;89014;102752;110083;116644;123022;130314;130344;133952;133960;140083;142403;142429;151547;170843;180505;184246;213681;221005;230604;256072;259103;260259;272411;294248;296229;300646;301370;304557;336268;356674;362632;372753;375689;376493;381527	3824;3825;3826;3827;3828;3829;3830;3831;3832	86;98;171;185;190;475;546;617;668
P13541;Q1WNQ4	P13541	Myosin-3	Myh3	122	121	73	62.3	721810000000	59713000000	57048000000	67609000000	31522000000	28197000000	114830000000	89671000000	90196000000	36682000000	146340000000	64148000000	74094000000	74678000000	61956000000	82633000000	106000000000	120830000000	127040000000	148800000000	136970000000	614;626;750;763;1374;1376;1853;1854;2707;2708;2727;2730;3028;3029;3637;4380;4650;5354;5512;6013;6368;6369;6635;6989;7557;7558;9782;9783;9791;10170;10651;10708;10709;10808;10864;11029;11038;11642;16689;16955;17103;17696;17788;19069;19504;19533;20115;20826;20984;21298;21415;22566;22597;22598;22653;22828;23073;23259;23295;23559;23912;24008;24154;24185;24399;25507;25531;27016;27023;27107;27256;27257;…	True;True;True;True;True;True;True;True;True;True;True;True;True;True;True;True;False;True;True;True;True;True;True;True;True;True;True;True;True;True;True;True;True;True;True;True;True;True;True;True;True;True;True;True;True;True;True;True;True;True;True;True;True;True;True;True;True;True;True;True;True;True;True;True;True;True;True;True;True;True;True;True;True;True;True;True;True;True;True;Tru…	674;688;689;828;841;1512;1514;1515;2050;2051;2052;2053;2054;2055;3016;3017;3037;3040;3355;3356;4015;4822;5115;5876;6043;6599;6984;6985;7275;7693;8296;8297;10724;10725;10733;11138;11702;11759;11760;11868;11926;12100;12109;12761;18361;18650;18807;19443;19545;20959;21429;21461;21462;21463;22100;22889;23114;23462;23585;24854;24888;24889;24951;24952;25140;25404;25618;25659;25938;26317;26422;26587;2662…	6677;6678;6679;6680;6681;6787;6788;6789;6790;6791;6792;6793;6794;6795;6796;6797;6798;6799;6800;6801;6802;6803;6804;6805;6806;6807;6808;6809;6810;6811;6812;6813;6814;6815;6816;6817;6818;6819;6820;6821;6822;6823;6824;6825;6826;6827;6828;6829;6830;6831;6832;6833;6834;6835;6836;6837;6838;6839;6840;6841;6842;8383;8384;8385;8386;8387;8388;8389;8390;8391;8392;8393;8513;8514;8515;8516;8517;8518;8519;8520…	4769;4770;4771;4847;4848;4849;4850;4851;4852;4853;4854;4855;4856;4857;4858;4859;4860;4861;4862;4863;4864;4865;4866;4867;4868;4869;4870;4871;4872;4873;4874;4875;4876;4877;4878;4879;4880;4881;4882;4883;4884;4885;4886;4887;5895;5896;5897;5898;5899;5954;5955;5956;5957;5958;5959;5960;5961;5962;5963;5964;5965;5966;5967;5968;5969;10757;10758;10759;10760;10761;10762;10763;10765;10766;10767;10768;10769;10…	4771;4873;5896;5965;10757;10775;14758;14765;21892;21898;22014;22031;24476;24502;29027;35315;37371;43038;44153;48699;51683;51700;53691;56938;62099;62123;80243;80254;80299;83089;86925;87274;87276;87924;88306;89374;89435;93796;139778;142044;143057;147986;148963;161718;164900;165146;169834;176451;177840;180586;181748;192155;192368;192382;192753;194095;195964;197703;197978;200232;202945;203592;204767;…	116;117;1234;1235;1236;1239;1240;1241;1973;1974;1975;1976;1977;1978;1979;1980;1981;1982;1983;1984	7;80;91;93;166;358;363;389;440;494;529;540;685;777;1430;1543;1598;1619;1765;1766
A2AQ53	A2AQ53		Fbn1	114	114	16	50.4	691570000000	133050000000	113910000000	113020000000	56943000000	28362000000	78418000000	43939000000	38741000000	15766000000	69424000000	134230000000	131850000000	119850000000	104330000000	81624000000	71649000000	73768000000	60010000000	63074000000	68543000000	471;1527;3273;4157;4165;4280;4334;4368;4369;4370;4371;4372;4391;4496;4498;4553;4554;4558;4645;4651;4710;4711;4725;4730;4731;4780;4806;4879;4900;4936;5346;6018;6139;6323;7926;9269;9281;9282;9551;10040;11760;13163;14471;14630;14698;15000;15026;15072;15085;15118;15183;16353;16420;16838;17001;17032;17145;17494;17596;17598;19298;20035;20467;20527;21641;24184;26218;28194;29102;29544;29853;30360;30377;3…	True;True;True;True;True;True;True;True;True;True;True;True;True;True;True;True;True;True;True;True;True;True;True;True;True;True;True;True;True;True;True;True;True;True;True;True;True;True;True;True;True;True;True;True;True;True;True;True;True;True;True;True;True;True;True;True;True;True;True;True;True;True;True;True;True;True;True;True;True;True;True;True;True;True;True;True;True;True;True;True…	513;1682;3617;4579;4580;4588;4711;4770;4771;4772;4807;4808;4809;4810;4811;4812;4813;4833;4946;4948;5006;5007;5011;5012;5013;5110;5116;5183;5184;5199;5205;5206;5258;5286;5363;5385;5422;5423;5868;6604;6735;6736;6934;8690;10165;10178;10179;10180;10475;10476;11002;12886;14445;15886;16064;16140;16488;16517;16518;16566;16580;16613;16686;17980;18056;18523;18702;18735;18852;19229;19336;19338;21208;22009;…	5085;5086;5087;5088;5089;5090;5091;5092;5093;5094;5095;5096;5097;5098;5099;5100;5101;5102;5103;17189;17190;17191;17192;17193;17194;17195;17196;17197;37716;37717;37718;37719;37720;37721;47885;47886;47887;47888;47889;47890;47891;47892;47893;47894;47895;47896;47897;47898;47899;47900;47901;47902;47903;47904;47905;47906;47907;47908;47909;47910;47911;47912;47913;47914;47915;47916;47917;47918;47919;4792…	3619;3620;3621;3622;3623;3624;3625;3626;3627;3628;3629;3630;3631;3632;3633;3634;3635;11978;11979;11980;26342;26343;33552;33553;33554;33555;33556;33557;33558;33559;33560;33561;33562;33563;33564;33565;33566;33567;33568;33569;33570;33571;33572;33573;33574;33575;33576;33577;33578;33579;33580;33581;33582;33583;33584;33585;33586;33587;33588;33589;33590;33591;33592;33633;34547;34548;34549;34550;34551;34…	3621;11978;26342;33573;33633;34548;34933;35164;35180;35183;35209;35218;35404;36221;36232;36726;36732;36764;37348;37378;37899;37921;38076;38113;38122;38524;38681;39242;39378;39612;42998;48794;49649;51278;65095;76014;76110;76128;78454;82173;94808;106737;117831;119449;120065;123863;124022;124634;124830;125054;125596;136028;136663;140952;142352;142606;143338;146439;147093;147133;163458;169189;173433;…	92;93;94;95;96;97;98;99;100;101;102;103;104;105;106;107;108;109;110;111;112;113;114;115	194;223;376;575;626;659;943;1036;1108;1109;1110;1272;1277;1435;1720;1787;1890;2130;2275;2349;2399;2692;2694;2790
P62737;P63268;D3YZY0;D3Z2K3	P62737;P63268;D3YZY0	Actin, aortic smooth muscle;Actin, gamma-enteric smooth muscle	Acta2;Actg2	29	14	2	81.4	681150000000	77237000000	78192000000	85749000000	37743000000	20525000000	107710000000	68800000000	74429000000	26731000000	104030000000	56509000000	78637000000	73307000000	64086000000	65485000000	83720000000	94213000000	96873000000	71496000000	94269000000	1298;1299;3863;3864;4339;4376;4684;6676;6677;6732;7471;7472;9606;13448;17648;17649;18628;20203;20204;22174;23511;23659;34036;34037;35970;40405;42776;43498;49168	False;False;False;False;True;True;True;False;False;True;False;False;False;True;True;True;False;False;False;True;True;False;True;True;False;False;True;True;True	1427;1428;4265;4266;4777;4817;5151;5152;5153;7319;7320;7321;7379;7380;8206;8207;10536;10537;14753;14754;14755;19393;19394;20478;20479;20480;22196;22197;24442;25887;25888;26046;26047;38097;38098;40190;45034;47710;47711;48508;54744;54745	14529;14530;14531;14532;14533;14534;14535;14536;14537;14538;14539;14540;14541;14542;14543;14544;14545;14546;14547;14548;14549;14550;14551;14552;44257;44258;44259;44260;44261;44262;44263;44264;44265;44266;44267;44268;44269;44270;44271;44272;44273;44274;44275;44276;44277;44278;44279;44280;44281;44282;44283;44284;44285;44286;44287;44288;44289;44290;44291;44292;44293;44294;44295;44296;44297;44298;442…	10182;10183;10184;10185;10186;10187;10188;10189;10190;10191;10192;10193;10194;10195;30900;30901;30902;30903;30904;30905;30906;30907;30908;30909;30910;30911;30912;30913;30914;30915;30916;30917;30918;30919;30920;30921;30922;30923;30924;30925;30926;30927;30928;30929;30930;30931;30932;30933;30934;30935;30936;30937;30938;30939;30940;30941;30942;30943;30944;30945;30946;30947;30948;30949;30950;30951;309…	10182;10192;30932;31005;34967;35263;37694;54091;54141;54577;61187;61197;78997;109270;147561;147571;157282;170696;170704;188706;199514;201060;287250;287270;301315;335053;355860;362245;409931	432;434;435;436;2848;2849;2850;2851;2852;2853	46;49;84;178;192;229;271;285;307;327
Q80X90	Q80X90	Filamin-B	Flnb	147	147	136	76	678640000000	101910000000	84428000000	92606000000	54246000000	32600000000	90670000000	57599000000	54884000000	20206000000	89490000000	98299000000	100690000000	103570000000	107620000000	108530000000	87336000000	80733000000	84918000000	85539000000	83838000000	168;494;617;869;1007;1083;1357;1458;1497;1565;1566;1880;2138;2139;2669;2765;2853;2910;3053;4161;4545;4621;4931;5019;5020;5034;5839;5840;5869;5883;5884;6285;6286;6333;6820;7084;7417;8099;8215;8298;8656;10522;10851;11490;11491;11873;12744;13156;13172;13894;14139;14147;14607;14721;14992;15007;15483;15749;16050;16614;16864;18196;18818;19096;19514;19515;20014;20453;20937;21059;21198;21347;22450;23801;…	True;True;True;True;True;True;True;True;True;True;True;True;True;True;True;True;True;True;True;True;True;True;True;True;True;True;True;True;True;True;True;True;True;True;True;True;True;True;True;True;True;True;True;True;True;True;True;True;True;True;True;True;True;True;True;True;True;True;True;True;True;True;True;True;True;True;True;True;True;True;True;True;True;True;True;True;True;True;True;True…	181;543;677;678;957;1109;1192;1495;1603;1604;1605;1648;1723;1724;2083;2358;2359;2972;3076;3173;3233;3380;4584;4998;5080;5417;5514;5515;5532;6411;6412;6442;6457;6458;6459;6460;6894;6895;6944;7509;7797;8149;8150;8885;9009;9100;9491;11561;11913;12592;12593;13010;13954;14438;14454;15250;15251;15519;15527;16038;16170;16171;16479;16495;17006;17007;17292;17614;18277;18550;19995;20684;20987;21440;21441;2…	1880;1881;1882;1883;1884;1885;1886;1887;1888;1889;1890;1891;1892;5410;5411;5412;5413;5414;5415;5416;5417;5418;5419;5420;5421;6699;6700;6701;6702;6703;6704;6705;6706;6707;6708;6709;6710;9808;9809;9810;9811;9812;9813;9814;9815;9816;9817;9818;9819;9820;9821;9822;9823;9824;9825;9826;9827;9828;11351;11352;11353;11354;11355;11356;11357;11358;11359;11360;12225;12226;12227;12228;12229;12230;15215;15216;1…	1370;1371;1372;1373;1374;1375;1376;1377;3890;3891;3892;3893;3894;3895;3896;3897;4782;4783;4784;4785;4786;4787;4788;4789;4790;4791;4792;4793;4794;4795;4796;4797;6862;6863;6864;6865;6866;6867;6868;6869;6870;6871;6872;6873;7893;7894;7895;7896;7897;7898;7899;8521;8522;8523;8524;8525;8526;10636;10637;10638;10639;10640;10641;10642;11384;11385;11386;11387;11388;11389;11390;11391;11392;11393;11394;11395;…	1370;3890;4795;6873;7894;8522;10636;11400;11690;12393;12407;15064;16930;16941;21585;22287;23106;23544;24646;33603;36637;37157;39593;40332;40355;40530;47069;47090;47328;47516;47542;50930;50949;51337;55610;57658;60638;66630;67426;68213;71204;86105;88200;92600;92605;95674;103148;106662;106814;113180;115089;115153;119202;120313;123786;123897;127948;130189;133070;139212;141147;152967;159092;161889;164…	4205;4206;4207;4208;4209;4210;4211;4212;4213;4214;4215;4216;4217;4218;4219;4220;4221;4222;4223;4224;4225;4226	270;549;633;696;700;918;1129;1201;1206;1589;1766;1798;1993;2020;2129;2148;2162;2429;2441;2445;2544;2561
Q01853	Q01853	Transitional endoplasmic reticulum ATPase	Vcp	70	70	70	79.8	672140000000	97277000000	87559000000	87245000000	45642000000	26356000000	94890000000	57704000000	62041000000	22498000000	90923000000	97108000000	97898000000	88580000000	88356000000	78353000000	88643000000	86697000000	88631000000	82929000000	83431000000	1060;1640;1641;1659;1735;3202;3326;3763;5930;7627;8304;8414;10095;10314;10315;10921;10922;11027;11028;11366;11367;11422;11423;12169;12170;12520;14382;14422;14564;15232;16329;17330;20176;22096;22431;22649;22937;22998;22999;23106;23741;24018;24614;25416;29142;29143;29174;30032;30304;30305;32007;33181;33603;33604;33651;35237;35238;35668;35735;35736;35791;36199;36855;40298;44989;46457;47123;47124;476…	True;True;True;True;True;True;True;True;True;True;True;True;True;True;True;True;True;True;True;True;True;True;True;True;True;True;True;True;True;True;True;True;True;True;True;True;True;True;True;True;True;True;True;True;True;True;True;True;True;True;True;True;True;True;True;True;True;True;True;True;True;True;True;True;True;True;True;True;True;True	1168;1809;1810;1811;1829;1914;3540;3670;4151;4152;6509;6510;8369;9107;9225;11061;11334;11335;11336;11337;11986;11987;11988;12098;12099;12456;12457;12518;12519;13332;13333;13713;13714;15785;15830;15989;16739;17953;17954;19046;22167;24358;24359;24708;24943;24944;24945;25252;25253;25317;25318;25439;26136;26433;27084;27956;32111;32112;32113;32114;32162;33569;33570;33955;33956;35854;37163;37619;37620;…	11946;11947;11948;11949;11950;11951;11952;11953;11954;18720;18721;18722;18723;18724;18725;18726;18727;18728;18729;18730;18731;18732;18733;18734;18735;18736;18737;18738;18739;18740;18741;18742;18743;18744;18745;18746;18747;18748;18749;18750;18751;18752;18753;18754;18755;18756;18757;18758;18759;18760;18761;18762;18763;18764;18765;18766;18767;18768;18769;18770;18771;18772;18969;18970;18971;18972;189…	8325;8326;8327;8328;8329;8330;13031;13032;13033;13034;13035;13036;13037;13038;13039;13040;13041;13042;13043;13044;13045;13046;13047;13048;13049;13050;13051;13052;13053;13054;13055;13056;13057;13058;13059;13060;13061;13062;13063;13064;13065;13066;13067;13068;13069;13070;13071;13072;13203;13204;13205;13206;13207;13208;13209;13210;13211;13212;13213;13214;13215;13216;13217;13218;13219;13220;13221;132…	8326;13031;13066;13223;13797;25701;26606;29971;47908;62643;68286;69014;82635;84435;84489;88634;88641;89337;89342;91737;91755;92112;92129;98144;98150;101407;117003;117546;118803;125884;135795;144574;170469;188114;190988;192686;194964;195410;195444;196168;201678;203680;208204;214696;244779;244812;245144;253590;256231;256247;270629;280801;283956;283962;284744;295655;295668;298700;299250;299258;29966…	3216;3217;3218;3219;3220;3221;3222;3223;3224;3225;3226;3227;3228;3229;3230;3231	46;219;275;332;344;427;442;449;508;550;608;611;678;720;740;757
P16546-2;P16546;A3KGU5;A3KGU7;E9Q447;A3KGU9;A3KGU4;P08032	P16546-2;P16546;A3KGU5;A3KGU7;E9Q447	Spectrin alpha chain, non-erythrocytic 1	Sptan1	158	158	158	71.4	668360000000	99318000000	87664000000	92468000000	51177000000	30526000000	90152000000	56232000000	51670000000	19872000000	89282000000	101110000000	104330000000	98610000000	94049000000	97320000000	87280000000	85417000000	75912000000	90493000000	84773000000	725;1470;1982;2206;2207;3056;3252;4833;5160;5352;5493;5728;6279;6310;6311;6312;6476;6583;6601;6664;6681;6682;6688;6696;6758;7032;7041;7278;7491;7617;7619;7637;7794;7992;8079;8146;8219;8230;8348;8729;8760;9001;10072;10184;10394;10542;10543;10622;10732;10733;10832;13206;14078;14427;14542;14711;16072;16160;16730;17307;17721;17722;17827;17832;18602;18603;18604;18606;18637;18638;19030;19376;19528;2172…	True;True;True;True;True;True;True;True;True;True;True;True;True;True;True;True;True;True;True;True;True;True;True;True;True;True;True;True;True;True;True;True;True;True;True;True;True;True;True;True;True;True;True;True;True;True;True;True;True;True;True;True;True;True;True;True;True;True;True;True;True;True;True;True;True;True;True;True;True;True;True;True;True;True;True;True;True;True;True;True…	802;1617;2189;2430;2431;3383;3594;5315;5667;5874;6024;6289;6887;6920;6921;6922;7096;7214;7215;7237;7238;7305;7325;7326;7332;7340;7341;7411;7740;7749;7999;8226;8227;8359;8361;8381;8548;8761;8862;8934;9013;9026;9152;9153;9568;9603;9868;9869;9870;11035;11153;11422;11583;11584;11669;11670;11784;11785;11786;11787;11893;14489;15450;15835;15965;16156;17636;17766;17767;18406;19021;19022;19470;19471;19589…	8000;8001;8002;8003;8004;8005;8006;8007;8008;8009;8010;8011;16401;16402;16403;16404;16405;16406;16407;16408;16409;16410;16411;16412;16413;16414;16415;16416;16417;16418;16419;16420;16421;16422;16423;16424;22506;22507;22508;22509;22510;22511;22512;22513;22514;22515;22516;22517;22518;22519;24844;24845;24846;24847;24848;24849;24850;24851;24852;24853;24854;24855;24856;24857;24858;24859;24860;24861;248…	5645;5646;5647;5648;5649;5650;5651;11459;11460;11461;11462;11463;11464;11465;11466;11467;11468;11469;11470;11471;11472;11473;11474;15696;15697;15698;15699;15700;15701;15702;15703;15704;15705;15706;15707;17391;17392;17393;17394;17395;17396;17397;17398;17399;17400;17401;17402;24660;24661;24662;24663;24664;24665;24666;24667;24668;24669;24670;24671;24672;24673;24674;24675;24676;26193;26194;26195;2619…	5649;11472;15707;17396;17401;24665;26193;38890;41523;43034;44036;45948;50830;51194;51214;51215;52521;53262;53427;53899;54166;54170;54200;54268;55027;57224;57302;59363;61476;62562;62571;62733;63888;65556;66307;66923;67455;67571;68598;71678;71911;73654;82459;83161;85117;86273;86275;86718;87412;87433;88058;107084;114562;117555;118545;120223;133250;134190;140107;144450;148197;148222;149268;149387;156…	2050;2051;2052;2053;2054;2055;2056;2057;2058;2059;2060;2061;2062;2063;2064;2065;2066;2067;2068;2069;2070;2071;2072	109;162;278;380;483;541;653;850;906;936;1178;1332;1419;1420;1592;1705;1870;2252;2282;2284;2310;2311;2425
Q62000	Q62000	Mimecan	Ogn	19	19	19	54	663450000000	107080000000	81404000000	97205000000	63928000000	33707000000	76434000000	40656000000	57265000000	24741000000	81032000000	102840000000	96727000000	104350000000	117850000000	99066000000	76261000000	61556000000	83156000000	72592000000	80263000000	5463;5476;5477;10865;10866;10963;11287;18567;19564;23603;23980;26773;26923;27613;27699;28090;36251;36398;44930	True;True;True;True;True;True;True;True;True;True;True;True;True;True;True;True;True;True;True	5989;6004;6005;6006;6007;11927;11928;12031;12373;12374;20410;21496;25985;26393;29478;29642;30393;30484;30900;40489;40638;50065	62390;62499;62500;62501;62502;62503;62504;62505;62506;62507;62508;62509;62510;62511;62512;62513;62514;62515;62516;62517;62518;62519;62520;62521;62522;62523;62524;62525;62526;62527;62528;62529;62530;62531;62532;62533;62534;62535;62536;62537;62538;62539;62540;62541;62542;62543;62544;62545;62546;62547;62548;62549;62550;62551;62552;62553;62554;62555;62556;62557;62558;62559;62560;62561;62562;62563;625…	43782;43873;43874;43875;43876;43877;43878;43879;43880;43881;43882;43883;43884;43885;43886;43887;43888;43889;43890;43891;43892;43893;43894;43895;43896;43897;43898;43899;43900;43901;43902;43903;43904;43905;43906;43907;43908;43909;43910;43911;43912;43913;43914;43915;43916;43917;43918;43919;43920;43921;43922;43923;43924;43925;43926;43927;43928;43929;43930;43931;43932;43933;88314;88315;88316;88317;883…	43782;43895;43931;88315;88340;88938;91266;156387;165381;200557;203391;225723;226846;232527;233379;236172;303557;304685;375718	3822;3823	63;142
P62259;D6REF3;F6WA09	P62259;D6REF3	14-3-3 protein epsilon	Ywhae	19	16	16	72.2	643430000000	94085000000	84659000000	88114000000	47405000000	33134000000	86356000000	58342000000	48777000000	24158000000	78398000000	86958000000	97917000000	91134000000	72862000000	91284000000	72631000000	76694000000	57016000000	75931000000	65302000000	127;353;6885;7441;7979;18323;20375;23066;23071;25138;29132;31213;31214;34773;43398;48249;48250;48821;48822	True;True;True;False;True;True;True;False;True;True;True;False;True;True;True;True;True;True;True	135;385;386;7580;7581;8174;8175;8748;20136;22385;25391;25400;25401;25402;27648;32094;32095;34954;34955;38907;38908;48389;48390;53732;53733;53734;53735;53736;54351;54352	1271;1272;1273;1274;1275;1276;1277;1278;1279;1280;1281;1282;1283;1284;1285;1286;1287;1288;1289;1290;1291;1292;1293;1294;1295;1296;1297;1298;1299;1300;1301;1302;1303;1304;1305;1306;1307;1308;1309;3706;3707;3708;3709;3710;3711;3712;3713;3714;3715;3716;3717;3718;3719;3720;3721;3722;3723;3724;3725;3726;3727;3728;3729;3730;3731;3732;3733;3734;3735;3736;3737;3738;3739;3740;3741;3742;3743;3744;3745;3746…	907;908;909;910;911;912;913;914;915;916;917;918;919;920;921;922;923;924;925;926;927;928;929;930;931;932;933;934;935;936;937;938;939;940;941;942;943;944;945;946;947;948;949;950;951;952;953;954;955;956;2580;2581;2582;2583;2584;2585;2586;2587;2588;2589;2590;2591;2592;2593;2594;2595;2596;2597;2598;2599;2600;2601;2602;2603;2604;2605;2606;2607;2608;2609;2610;2611;2612;2613;2614;2615;2616;2617;2618;2619…	924;2648;56213;60803;65471;154190;172370;195787;195937;212557;244706;263636;263670;292671;361368;402213;402262;407039;407048	1060;2808;2809;2810;2811;2812;2813;2814	1;23;27;33;88;160;221;235
Q62356	Q62356	Follistatin-related protein 1	Fstl1	20	20	20	70.3	632590000000	122930000000	89229000000	94709000000	45626000000	34229000000	75279000000	45087000000	38965000000	16139000000	70401000000	117690000000	116020000000	102530000000	93574000000	102520000000	71486000000	68880000000	57729000000	62876000000	70351000000	4292;4595;4872;4979;8341;14796;17400;19257;21372;25363;27618;36657;37283;37284;37285;37759;38552;41384;43224;43225	True;True;True;True;True;True;True;True;True;True;True;True;True;True;True;True;True;True;True;True	4725;5054;5355;5356;5472;9145;16259;19127;21165;23539;27898;30398;40926;41602;41603;41604;42127;42992;46120;48207;48208	49453;49454;49455;49456;49457;49458;49459;49460;49461;49462;49463;49464;49465;49466;49467;49468;49469;49470;49471;49472;49473;49474;49475;52850;52851;52852;52853;52854;52855;52856;52857;52858;52859;52860;52861;52862;52863;52864;52865;52866;52867;52868;52869;52870;52871;52872;52873;52874;52875;52876;52877;52878;52879;52880;52881;52882;52883;52884;52885;52886;52887;52888;52889;52890;52891;52892;528…	34659;34660;34661;34662;34663;34664;34665;34666;34667;34668;34669;34670;34671;34672;34673;34674;34675;34676;34677;34678;34679;36958;36959;36960;36961;36962;36963;36964;36965;36966;36967;36968;36969;36970;36971;36972;36973;36974;36975;36976;36977;36978;36979;36980;36981;36982;36983;36984;36985;36986;36987;36988;36989;36990;36991;36992;36993;36994;36995;36996;36997;36998;36999;37000;37001;37002;370…	34660;36991;39158;39934;68528;121647;145169;163185;181245;214204;232593;306747;311444;311460;311473;314922;320955;343940;360002;360061	3891	263
P17182;Q6PHC1;B1ARR7;B1ARR6	P17182;Q6PHC1	Alpha-enolase;Enolase	Eno1	25	25	13	78.3	631240000000	96154000000	74305000000	71042000000	46734000000	21121000000	94122000000	51059000000	56998000000	20453000000	99252000000	84577000000	91337000000	71375000000	86082000000	65278000000	77828000000	71828000000	78181000000	76060000000	84767000000	424;426;1529;5117;8158;12422;13693;16235;17420;18141;19552;19908;23219;23286;26352;37366;37883;37917;37979;38054;39223;41460;45934;45974;48799	True;True;True;True;True;True;True;True;True;True;True;True;True;True;True;True;True;True;True;True;True;True;True;True;True	462;464;1685;1686;5621;8946;13605;15025;17848;19147;19934;21482;21869;25568;25569;25570;25649;25650;28974;28975;28976;41694;42263;42299;42370;42450;43734;46205;51217;51260;54327	4536;4537;4538;4539;4540;4541;4542;4543;4544;4545;4546;4547;4548;4549;4550;4551;4552;4553;4554;4555;4556;4557;4558;4559;4560;4561;4562;4563;4564;4565;4566;4567;4568;4569;4570;4571;4572;4573;4574;4575;4576;4577;4578;4579;4601;4602;4603;4604;4605;4606;4607;4608;4609;4610;4611;4612;4613;4614;4615;4616;4617;4618;4619;4620;4621;4622;4623;4624;4625;4626;4627;4628;4629;4630;4631;4632;4633;17211;17212;17…	3187;3188;3189;3190;3191;3192;3193;3194;3195;3196;3197;3198;3199;3200;3201;3202;3203;3204;3205;3206;3207;3208;3209;3210;3211;3212;3213;3214;3215;3216;3217;3218;3219;3220;3221;3222;3223;3224;3225;3226;3227;3228;3229;3230;3231;3232;3233;3234;3235;3236;3237;3238;3239;3240;3241;3257;3258;3259;3260;3261;3262;3263;3264;3265;3266;3267;3268;3269;3270;3271;3272;3273;3274;3275;3276;3277;3278;3279;3280;3281…	3212;3280;12011;41100;66983;100319;111133;134782;145345;152497;165263;168154;197308;197928;221753;312029;315774;316105;316623;317154;326086;344947;383965;384284;406779	204;205;206;207;2075;2076	94;97;165;169;244;368
P62806	P62806	Histone H4	Hist1h4a	12	12	12	66	628380000000	88746000000	77385000000	91779000000	65989000000	43633000000	58804000000	48696000000	44873000000	29810000000	78663000000	80147000000	85648000000	78995000000	107450000000	120160000000	42057000000	64098000000	52237000000	83569000000	54990000000	5139;6868;6869;21552;21553;36183;42066;43086;43087;44327;44328;45569	True;True;True;True;True;True;True;True;True;True;True;True	5644;7560;7561;23737;23738;40418;46876;48052;48053;48054;48055;49418;49419;50767	58973;58974;58975;58976;58977;58978;58979;58980;58981;58982;58983;58984;58985;58986;58987;58988;58989;58990;58991;78921;78922;78923;78924;78925;78926;78927;78928;78929;78930;78931;78932;78933;78934;78935;78936;257127;257128;257129;257130;257131;257132;257133;257134;257135;257136;257137;257138;257139;257140;257141;257142;257143;257144;257145;257146;257147;257148;257149;257150;257151;257152;257153;…	41351;41352;41353;41354;41355;41356;41357;41358;41359;41360;41361;41362;41363;41364;41365;41366;55975;55976;55977;55978;55979;182898;182899;182900;182901;182902;182903;182904;182905;182906;182907;182908;182909;182910;182911;182912;182913;182914;182915;182916;182917;182918;182919;182920;182921;182922;182923;182924;182925;182926;182927;182928;182929;182930;182931;182932;182933;182934;182935;182936;…	41353;55975;55976;182916;182950;303094;350175;358660;358810;370142;370293;380829	2859	85
Q80YX1	Q80YX1	Tenascin	Tnc	92	92	4	59.9	612310000000	99142000000	87229000000	94825000000	48566000000	28083000000	82222000000	44161000000	44451000000	17998000000	65632000000	101520000000	105090000000	99494000000	92406000000	87773000000	77984000000	69384000000	64605000000	67015000000	63875000000	85;480;981;2929;3474;3497;3794;4187;4188;4189;4375;4493;4494;4719;4873;4896;4897;4898;5121;5204;5701;6498;6690;7480;7747;7786;8287;8415;8651;9009;9539;9809;10497;10640;10974;11211;11328;11525;13780;14913;15347;15849;21217;21727;21919;23535;23782;23930;25619;26098;26636;26814;27480;27902;28135;30805;32886;33045;35101;35202;35631;35754;36585;36842;36949;37042;39536;39867;40135;40552;42325;42326;424…	True;True;True;True;True;True;True;True;True;True;True;True;True;True;True;True;True;True;True;True;True;True;True;True;True;True;True;True;True;True;True;True;True;True;True;True;True;True;True;True;True;True;True;True;True;True;True;True;True;True;True;True;True;True;True;True;True;True;True;True;True;True;True;True;True;True;True;True;True;True;True;True;True;True;True;True;True;True;True;True…	91;523;1080;3252;3835;3860;4188;4610;4611;4612;4816;4943;4944;5193;5357;5381;5382;5383;5625;5714;5715;6256;7119;7334;8215;8497;8540;9089;9226;9486;9879;10460;10461;10752;11533;11690;11691;12043;12293;12415;12630;15119;16388;16863;16864;17398;23371;23951;24161;24162;24163;25914;26178;26337;28174;28680;29327;29524;29525;30248;30696;30958;34506;36823;36995;39257;39366;39831;39961;40845;41120;41234;4…	864;865;866;867;868;869;870;871;872;873;5174;11087;11088;11089;11090;11091;11092;11093;11094;11095;11096;33935;33936;33937;33938;33939;33940;33941;33942;33943;33944;39785;39786;39787;39788;39789;39790;39791;39792;39793;39794;39795;39796;39797;39798;39799;39800;39801;39802;39803;39804;40072;40073;40074;40075;40076;40077;40078;40079;40080;40081;40082;40083;40084;40085;40086;40087;40088;40089;40090;…	631;632;633;634;635;636;637;638;639;640;3688;7732;7733;7734;7735;7736;7737;23761;23762;23763;23764;23765;23766;23767;23768;23769;23770;27799;27800;27801;27802;27803;27804;27805;27806;27807;27808;27809;27810;27811;27812;27813;27814;27815;27816;27817;27818;28002;28003;28004;28005;28006;28007;28008;28009;28010;28011;28012;30260;30261;30262;30263;30264;30265;30266;30267;30268;30269;30270;30271;30272;…	632;3688;7732;23761;27814;28002;30272;33745;33747;33758;35250;36183;36188;38050;39181;39337;39339;39365;41129;41811;45678;52675;54226;61261;63499;63826;68044;69018;71172;73713;78163;80403;85921;86863;89066;90716;91458;92825;111986;122892;126806;131003;179958;184627;186465;200069;201945;203056;216221;219794;224632;226093;231444;234756;236596;260086;278230;279512;294674;295406;298448;299432;306034;…	4228;4229;4230;4231;4232;4233;4234;4235;4236;4237;4238;4239;4240	60;142;655;666;1337;1619;1626;1656;1663;1691;1897;2023;2093
Q7TPR4	Q7TPR4	Alpha-actinin-1	Actn1	68	42	3	81.5	611370000000	96770000000	93530000000	91797000000	38729000000	27209000000	84521000000	49130000000	42529000000	18305000000	68853000000	80149000000	97902000000	81634000000	74403000000	78142000000	74422000000	72348000000	59210000000	58973000000	65603000000	310;500;1481;1482;1792;2006;3318;3319;3360;3644;4746;5297;5755;5976;6533;7072;7882;9179;10064;10872;11164;11937;15600;17560;17561;17825;18696;18832;19273;19441;20893;21572;22081;22326;22477;22478;23141;23305;23306;23628;23886;23887;24160;25741;26359;27727;28641;29066;29578;30027;30125;32085;32201;32202;32293;34069;35498;35710;35790;38476;41179;41566;41585;41586;44135;44713;45159;46034	True;True;True;True;False;False;True;True;False;True;False;True;True;True;False;True;True;False;False;True;True;False;True;False;False;False;True;True;True;True;True;True;True;True;False;True;True;False;False;False;False;False;False;True;False;False;True;True;True;False;True;True;True;True;False;True;True;True;False;True;False;False;True;True;True;False;True;True	338;339;340;549;1631;1632;1982;1983;2216;3662;3663;3708;4022;5223;5816;6317;6562;7155;7784;8644;10063;11027;11934;12244;12245;13079;17134;17135;19296;19297;19587;20551;20699;20700;21181;21364;22998;22999;23759;23760;24342;24343;24599;24758;24759;25478;25669;25670;26013;26290;26291;26593;28302;28985;28986;30513;30514;31501;31989;31990;31991;32817;32818;33562;33725;33726;35946;36069;36070;36170;361…	3320;3321;3322;3323;3324;3325;3326;3327;3328;3329;3330;3331;3332;3333;3334;3335;3336;3337;3338;3339;3340;3341;3342;3343;3344;3345;3346;3347;3348;3349;5494;5495;5496;5497;5498;5499;5500;5501;5502;5503;5504;5505;5506;5507;5508;16576;16577;16578;16579;16580;16581;16582;16583;16584;16585;16586;16587;16588;16589;16590;16591;16592;16593;16594;16595;16596;16597;16598;16599;16600;16601;16602;16603;16604;…	2323;2324;2325;2326;2327;2328;2329;2330;2331;2332;2333;2334;2335;2336;2337;2338;2339;3940;3941;3942;11568;11569;11570;11571;11572;11573;11574;11575;11576;11577;11578;11579;11580;11581;11582;11583;11584;11585;11586;11587;11588;11589;11590;11591;11592;11593;11594;11595;11596;11597;11598;11599;11600;11601;11602;11603;11604;11605;11606;11607;11608;11609;11610;14194;14195;14196;14197;14198;14199;14200…	2328;3940;11574;11579;14222;15946;26564;26578;26959;29050;38257;42595;46182;48393;52900;57529;64718;75082;82323;88373;90380;96151;128942;146794;146808;149211;157839;159226;163270;164513;177110;183126;187954;190238;191333;191380;196434;198045;198080;200800;202777;202783;204799;217008;221817;233599;240686;243968;249029;253541;254637;271612;272597;272615;273445;287654;297452;299003;299637;320506;341…	1;2;3;4;5;6;7;8;9;10;11;12;13;14;15;16;19;20;21	66;126;221;239;276;306;309;354;360;525;529;586;660;710;748;796;830;864;880
P06151;G5E8N5;D3Z736;D3YZQ9;Q6NXW3;P00342;D3YVR7;D3YZE4	P06151;G5E8N5;D3Z736;D3YZQ9	L-lactate dehydrogenase A chain;L-lactate dehydrogenase	Ldha	21	21	20	78.3	606760000000	92513000000	81447000000	72420000000	40921000000	22197000000	89490000000	58987000000	50111000000	17848000000	80823000000	89177000000	99649000000	83450000000	74757000000	50724000000	83433000000	78408000000	63017000000	47909000000	64674000000	6283;7128;7867;8794;12715;14751;16087;17674;21902;24923;25872;28455;31727;35398;36986;37162;38848;44797;44920;46936;46937	True;True;True;True;True;True;True;True;True;True;True;True;True;True;True;True;True;True;True;True;True	6891;6892;7843;8629;9647;13924;16204;16205;16206;17651;19420;19421;24142;24143;24144;27421;28443;31297;35550;39580;41276;41277;41466;43309;49919;49920;50054;52301;52302	71974;71975;71976;71977;71978;71979;71980;71981;71982;71983;71984;71985;71986;71987;71988;71989;71990;71991;71992;71993;71994;71995;71996;71997;71998;71999;72000;72001;72002;72003;72004;72005;72006;72007;72008;72009;72010;72011;72012;72013;72014;72015;72016;72017;72018;72019;72020;72021;72022;72023;72024;72025;72026;72027;72028;81789;81790;81791;81792;81793;81794;81795;81796;81797;81798;81799;818…	50845;50846;50847;50848;50849;50850;50851;50852;50853;50854;50855;50856;50857;50858;50859;50860;50861;50862;50863;50864;50865;50866;50867;50868;50869;50870;50871;50872;50873;50874;50875;50876;50877;50878;50879;50880;50881;50882;50883;50884;50885;50886;50887;50888;50889;50890;50891;50892;50893;50894;50895;50896;50897;50898;50899;50900;50901;50902;50903;50904;50905;50906;50907;50908;50909;50910;509…	50915;58106;64600;72248;102907;120821;133365;147847;186229;210643;218098;238932;268084;296844;309143;310432;323412;374568;375584;392069;392072	1375;1376;1377;1378;1379;1380;1381	33;41;54;62;63;264;276
P05064;A6ZI44;D3YWI1;D3Z510;A6ZI47;D3YV98;P05063;Q91Y97	P05064;A6ZI44;D3YWI1	Fructose-bisphosphate aldolase A;Fructose-bisphosphate aldolase	Aldoa	31	31	13	86.5	605860000000	79822000000	69163000000	79325000000	39558000000	24844000000	76582000000	63222000000	56432000000	24597000000	92318000000	70099000000	78927000000	80862000000	68668000000	66905000000	74461000000	89857000000	82057000000	85179000000	85883000000	330;565;1962;2361;2415;2416;4761;10122;13597;13598;15311;15529;17464;19945;27281;27282;32786;32787;33173;33582;34591;34592;35547;35635;36422;36423;43049;45113;45921;48167;49499	True;True;True;True;True;True;True;True;True;True;True;True;True;True;True;True;True;True;True;True;True;True;True;True;True;True;True;True;True;True;True	360;619;2168;2598;2655;2656;2657;5238;11089;14921;14922;14923;14924;16824;17056;19195;21912;21913;30035;30036;36708;36709;37154;37155;37597;38698;38699;39741;39835;40663;40664;48012;50271;51201;53634;55100	3502;3503;3504;3505;3506;3507;3508;3509;3510;3511;6121;6122;6123;6124;6125;6126;6127;6128;6129;6130;6131;6132;6133;6134;6135;6136;6137;6138;6139;6140;6141;6142;22345;22346;22347;22348;22349;22350;22351;26868;26869;26870;26871;26872;27415;27416;27417;27418;27419;27420;27421;27422;27423;27424;27425;27426;27427;27428;27429;27430;27431;27432;27433;27434;27435;27436;27437;27438;27439;27440;27441;27442…	2442;2443;2444;4379;4380;4381;4382;4383;4384;4385;4386;4387;4388;4389;4390;4391;4392;4393;4394;4395;4396;4397;4398;4399;4400;4401;4402;15575;15576;15577;15578;15579;15580;15581;18841;18842;19229;19230;19231;19232;19233;19234;19235;19236;19237;19238;19239;19240;19241;19242;19243;19244;19245;19246;19247;19248;19249;19250;19251;19252;19253;19254;19255;19256;19257;19258;19259;19260;19261;19262;19263;…	2443;4381;15580;18841;19278;19296;38373;82790;110375;110416;126534;128221;146232;168506;229627;229632;277427;277465;280751;283800;291183;291212;297766;298463;304905;304913;358284;377303;383722;401480;412611	1719;1720;1721	165;233;251
P10126;D3YZ68;D3Z3I8;P62631;B7ZBW3	P10126;D3YZ68	Elongation factor 1-alpha 1	Eef1a1	22	22	22	64.1	585140000000	62203000000	53577000000	65459000000	33407000000	25025000000	96902000000	60930000000	71644000000	28165000000	87829000000	57680000000	62856000000	70494000000	64267000000	76574000000	88238000000	88827000000	93883000000	90041000000	75644000000	5835;9295;19965;20087;22568;26806;29203;30462;31375;32668;33048;33107;34567;35260;37088;37950;37951;40086;41414;44166;49705;49706	True;True;True;True;True;True;True;True;True;True;True;True;True;True;True;True;True;True;True;True;True;True	6407;10193;21934;22067;22068;22069;24856;29514;32207;34127;34128;35140;35141;36577;36578;36998;37060;37061;38672;39429;41385;42335;42336;42337;42338;42339;44681;46152;49235;49236;55321;55322	66670;66671;66672;66673;66674;66675;66676;66677;66678;66679;66680;66681;66682;66683;66684;66685;66686;66687;66688;66689;66690;66691;66692;66693;66694;66695;66696;66697;66698;66699;66700;66701;66702;66703;66704;66705;66706;106775;106776;106777;106778;106779;106780;106781;106782;106783;106784;106785;106786;106787;106788;106789;106790;106791;106792;106793;106794;106795;106796;106797;106798;106799;10…	46999;47000;47001;47002;47003;47004;47005;47006;47007;47008;47009;47010;47011;47012;47013;47014;47015;47016;47017;47018;47019;47020;47021;47022;47023;47024;47025;47026;47027;47028;76227;76228;76229;76230;76231;76232;76233;76234;76235;76236;76237;76238;76239;76240;76241;76242;76243;76244;76245;76246;76247;76248;76249;76250;76251;76252;76253;76254;76255;76256;76257;76258;76259;76260;76261;76262;762…	47015;76245;168672;169556;192166;226024;245413;257301;265171;276576;279549;280175;291047;295850;309901;316398;316423;332428;344357;368251;414082;414097	1874;1875;1876;1877;1878;1879;1880	102;201;208;276;335;404;410
P33434	P33434	72 kDa type IV collagenase;PEX	Mmp2	37	37	37	67.2	575510000000	95489000000	105030000000	98762000000	41657000000	23198000000	69886000000	40296000000	33332000000	11742000000	56121000000	102910000000	120620000000	109550000000	81671000000	57927000000	66537000000	61088000000	43525000000	43644000000	57081000000	3856;4450;4451;5760;6273;9717;10966;11829;12358;12359;13268;13271;13364;19343;20102;20275;22650;22940;24099;25113;27658;29185;33072;33429;33847;37428;43210;47399;47438;47618;47619;47620;47677;48393;48547;48548;48606	True;True;True;True;True;True;True;True;True;True;True;True;True;True;True;True;True;True;True;True;True;True;True;True;True;True;True;True;True;True;True;True;True;True;True;True;True	4258;4896;4897;6322;6881;10654;12034;12961;13535;13536;13537;13538;14554;14557;14658;21259;22084;22085;22278;24946;24947;25257;26528;27623;30440;32178;32179;37022;37426;37891;41764;48193;52814;52854;53046;53047;53048;53107;53892;54056;54057;54058;54059;54123	44147;44148;44149;44150;44151;44152;44153;44154;44155;44156;44157;44158;44159;44160;44161;44162;44163;44164;44165;44166;44167;44168;44169;44170;44171;44172;44173;44174;44175;44176;44177;44178;44179;44180;44181;44182;44183;44184;44185;51151;51152;51153;51154;51155;51156;51157;51158;51159;51160;51161;51162;51163;51164;51165;51166;51167;51168;51169;51170;51171;51172;51173;51174;51175;65658;65659;656…	30825;30826;30827;30828;30829;30830;30831;30832;30833;30834;30835;30836;30837;30838;30839;30840;30841;30842;30843;30844;30845;30846;30847;30848;30849;30850;30851;30852;30853;30854;30855;30856;35831;35832;35833;35834;35835;35836;35837;35838;35839;35840;35841;35842;35843;35844;35845;35846;35847;35848;35849;35850;35851;35852;35853;35854;35855;35856;35857;46242;46243;46244;46245;46246;46247;46248;462…	30850;35843;35857;46252;50774;79755;88963;95370;99830;99842;107500;107560;108384;163797;169703;171402;192691;194981;204328;212279;232980;245229;279833;282743;286108;312535;359821;396008;396243;397622;397628;397646;398080;403431;404481;404520;405053	2356;2357;2358;2359;2360	97;170;282;337;600
Q02819;D3Z7D7;D3Z1N1	Q02819	Nucleobindin-1	Nucb1	38	38	38	78.2	559680000000	103860000000	85774000000	85974000000	47773000000	32853000000	64050000000	40029000000	32379000000	14229000000	52758000000	103050000000	100010000000	90849000000	88503000000	91617000000	64025000000	61590000000	53013000000	56218000000	53842000000	316;699;6305;6388;7744;8055;8918;10102;11687;11688;22898;26959;27772;27775;28678;28679;29904;30505;30506;31990;31991;31992;32446;33996;34062;34977;35792;35844;37105;39455;41088;42938;45971;46039;48872;48873;48987;48988	True;True;True;True;True;True;True;True;True;True;True;True;True;True;True;True;True;True;True;True;True;True;True;True;True;True;True;True;True;True;True;True;True;True;True;True;True;True	346;776;6915;7005;8494;8836;9780;11068;12811;12812;25212;29683;30560;30563;31542;31543;33362;34177;34178;34179;34180;34181;35832;35833;35834;36336;38055;38056;38125;39125;40000;40001;40057;41402;43992;45795;47888;47889;51257;51335;54405;54406;54531;54532	3382;3383;3384;3385;3386;3387;7766;7767;7768;7769;72285;72286;72287;72288;72289;72290;72291;72292;72293;72294;72295;72296;72297;72298;72299;72300;72301;72302;72303;72304;72305;72306;72307;72308;72309;72310;72311;72312;72313;72314;72315;72316;72317;72318;72319;72320;72321;72322;72323;72324;72325;73222;73223;73224;73225;73226;73227;73228;73229;73230;73231;73232;73233;73234;73235;73236;73237;73238;7…	2363;2364;2365;5495;5496;5497;51115;51116;51117;51118;51119;51120;51121;51122;51123;51124;51125;51126;51127;51128;51129;51130;51131;51132;51133;51134;51135;51136;51137;51138;51139;51140;51141;51142;51143;51144;51145;51146;51147;51148;51149;51150;51151;51152;51153;51154;51832;51833;51834;51835;51836;51837;51838;51839;51840;51841;51842;51843;51844;51845;51846;51847;51848;51849;51850;51851;51852;518…	2364;5495;51148;51832;63494;66145;73071;82670;94249;94254;194675;227178;233840;233877;241088;241097;252383;257656;257672;270496;270507;270512;274741;287056;287601;293854;299701;300206;310001;327750;341039;357117;384253;384857;407423;407431;408358;408403	3257;3258;3259;3260;3261	131;285;288;337;395
P08113;F7C312	P08113;F7C312	Endoplasmin	Hsp90b1	42	41	41	60.5	529990000000	74086000000	58747000000	71364000000	34767000000	22604000000	78589000000	49624000000	45789000000	21999000000	72417000000	77389000000	71841000000	71690000000	63827000000	66247000000	71680000000	69561000000	61939000000	72861000000	71425000000	2970;4216;6203;8066;8588;8612;8812;8901;8928;9926;10970;11275;11435;11917;13426;15778;17170;17446;17566;18504;22225;24924;25261;25381;27996;31153;31197;31198;32868;35888;36977;38150;38175;38361;40763;41032;41079;43025;43126;44315;49084;49424	True;True;True;True;True;True;True;True;True;False;True;True;True;True;True;True;True;True;True;True;True;True;True;True;True;True;True;True;True;True;True;True;True;True;True;True;True;True;True;True;True;True	3294;4640;6805;8848;9416;9441;9666;9760;9761;9790;10877;12038;12361;12531;13057;14729;17324;18878;19175;19302;20343;24494;24495;27422;27783;27918;30800;30801;34888;34936;34937;34938;34939;36803;40102;41265;41266;41267;42559;42584;42784;45433;45733;45785;47983;47984;48101;48102;49404;49405;49406;54655;55019	34364;34365;34366;34367;34368;34369;34370;34371;48481;48482;48483;48484;48485;48486;48487;48488;48489;48490;70964;70965;70966;70967;70968;70969;70970;70971;70972;70973;92643;92644;92645;92646;92647;92648;92649;92650;92651;98794;98795;98796;98797;98798;98799;98800;98801;98802;98803;98804;98805;98806;98807;98808;98809;98810;98811;98812;98813;98814;98815;98816;98817;98818;99052;99053;99054;99055;990…	24044;24045;24046;24047;33974;33975;33976;33977;33978;33979;50119;50120;50121;50122;50123;50124;50125;50126;50127;50128;66198;66199;66200;66201;66202;66203;66204;66205;66206;70519;70520;70521;70522;70523;70524;70525;70526;70527;70528;70529;70530;70531;70532;70533;70534;70535;70536;70537;70538;70539;70540;70541;70542;70543;70544;70545;70707;70708;70709;70710;70711;70712;70713;70714;70715;70716;707…	24044;33974;50125;66199;70541;70707;72351;72981;73114;81309;88979;91166;92237;95944;108983;130446;143521;145976;146868;155751;189356;210658;213393;214376;235468;263147;263502;263546;278069;300587;309097;317993;318168;319539;338124;340470;340960;357979;359113;370033;409116;412095	1803;1804;1805;1806;1807;1808;1809;1810	154;336;425;426;541;622;658;711
O88207;A3KGE7	O88207	Collagen alpha-1(V) chain	Col5a1	71	70	62	57.9	515650000000	89964000000	84356000000	89156000000	46231000000	29701000000	53399000000	34023000000	27005000000	11406000000	50411000000	78484000000	89920000000	82820000000	77271000000	85224000000	46690000000	46349000000	35342000000	44346000000	43328000000	2498;5097;5281;5768;5771;6636;10419;10420;11332;12460;12477;12907;14493;14509;14521;14606;14774;14810;14838;14914;15048;15261;15385;15386;15568;15930;15949;16244;16274;16275;16280;16281;16385;16411;16415;16444;16451;16470;16490;16508;16666;16929;16940;17133;19146;19147;20471;22468;24012;24932;26175;30892;32655;32679;32681;32691;34740;36018;36615;36845;37440;39411;39412;39840;41308;41309;41316;427…	True;True;True;True;True;True;True;True;True;True;True;True;True;True;True;True;True;True;True;True;True;True;True;True;True;True;True;True;True;True;True;True;True;True;True;False;True;True;True;True;True;True;True;True;True;True;True;True;True;True;True;True;True;True;True;True;True;True;True;True;True;True;True;True;True;True;True;True;True;True;True	2750;5599;5600;5799;6330;6333;7276;11449;11450;12420;13647;13666;14131;14132;15908;15927;15943;16037;16234;16274;16305;16306;16389;16542;16771;16904;16905;17097;17098;17486;17507;17860;17892;17893;17900;17901;17902;18014;18015;18045;18046;18051;18083;18090;18091;18111;18112;18113;18139;18161;18332;18622;18634;18840;21041;21042;22494;24749;26426;26427;27431;28763;28764;34604;36560;36561;36590;3659…	28604;58410;58411;58412;58413;58414;58415;58416;58417;58418;58419;58420;58421;58422;58423;58424;60512;60513;60514;60515;60516;60517;60518;60519;60520;60521;60522;60523;60524;60525;60526;60527;60528;60529;60530;60531;60532;60533;60534;60535;60536;65791;65792;65793;65794;65795;65796;65797;65798;65799;65800;65801;65802;65844;65845;65846;65847;65848;65849;65850;65851;65852;65853;65854;65855;65856;658…	20063;40932;40933;40934;40935;40936;40937;40938;40939;42449;42450;42451;42452;42453;42454;42455;42456;42457;42458;42459;42460;42461;42462;42463;42464;42465;42466;42467;42468;42469;42470;42471;42472;42473;42474;46383;46384;46385;46386;46387;46388;46389;46390;46420;46421;46422;46423;46424;46425;46426;46427;46428;46429;46430;46431;53693;53694;53695;53696;53697;53698;53699;53700;53701;53702;53703;537…	20063;40939;42460;46386;46425;53693;85273;85282;91520;100950;101097;104508;117950;118096;118203;119195;121220;121911;122077;122898;124416;126128;127169;127180;128667;131698;132104;134847;135028;135033;135166;135171;136318;136534;136631;137325;137386;137686;137890;138072;139599;141759;141825;143285;162212;162217;173489;191286;203632;210742;220347;260950;276426;276694;276720;276803;292346;301648;30…	1593;1594;1595;1596;1597;1598;1599;1600;1601;1602;1603;1604;1605;1606;1607;1608	85;206;519;521;538;564;573;701;755;1011;1248;1464;1625;1728;1774;1816
P10493;F6SV87	P10493	Nidogen-1	Nid1	63	62	62	70	500360000000	77998000000	68405000000	80434000000	41911000000	26182000000	64594000000	32502000000	36910000000	11368000000	60052000000	80844000000	86995000000	91983000000	79542000000	69344000000	65783000000	54535000000	51235000000	44526000000	57708000000	761;1138;2973;3378;4373;4448;4677;4678;5446;5857;7615;7864;8492;10244;11026;11839;13305;14412;15034;15635;15636;16057;16225;16226;17030;17625;18610;19702;19732;19888;20454;22339;28873;30747;31348;32321;32684;32759;32841;33682;33822;33854;33967;34949;35213;35214;36055;36149;37001;37878;39122;39123;39802;40471;41513;41514;42182;44940;45249;45297;46158;47393;48143	True;True;True;True;True;True;True;True;True;True;True;True;True;True;True;True;True;True;True;True;True;True;False;True;True;True;True;True;True;True;True;True;True;True;True;True;True;True;True;True;True;True;True;True;True;True;True;True;True;True;True;True;True;True;True;True;True;True;True;True;True;True;True	839;1248;3297;3729;4814;4894;5142;5143;5972;6429;8357;8626;9313;9314;11221;11222;12097;12972;12973;14595;15818;16527;17174;17175;17621;17837;17838;18733;19369;20459;21643;21677;21846;21847;22475;24614;31748;34441;35101;36200;36595;36677;36774;37711;37865;37899;38021;39095;39379;39380;40283;40383;41294;42257;43627;43628;44370;45107;46263;46264;47047;47048;50075;50416;50467;51467;52808;53606	8500;8501;8502;8503;8504;8505;8506;8507;12759;12760;12761;12762;12763;12764;12765;12766;12767;12768;34393;34394;34395;34396;34397;34398;34399;34400;34401;34402;34403;34404;34405;34406;34407;34408;34409;38822;38823;38824;38825;38826;38827;38828;38829;38830;38831;38832;38833;38834;38835;38836;38837;38838;38839;38840;38841;38842;38843;38844;50311;50312;50313;50314;50315;50316;50317;50318;50319;50320…	5951;5952;8889;8890;8891;8892;8893;8894;8895;8896;8897;8898;24066;24067;24068;24069;24070;24071;24072;24073;24074;24075;24076;24077;24078;24079;24080;24081;27161;27162;27163;27164;27165;27166;27167;27168;27169;27170;27171;27172;27173;27174;27175;27176;27177;27178;35228;35229;35230;35231;35232;35233;35234;35235;35236;35237;35238;35239;35240;35241;35242;35243;35244;35245;35803;35804;35805;35806;358…	5952;8897;24077;27173;35228;35811;37547;37549;43693;47245;62547;64568;69702;83815;89335;95443;107935;117460;124124;129287;129295;133141;134670;134678;142579;147269;156944;166558;166896;168019;173288;190319;242294;259620;264940;273579;276746;277240;277925;284924;285906;286178;286811;293686;295512;295514;301946;302786;309271;315756;325424;325438;330414;335588;345380;345395;351219;375806;378396;3787…	1881;1882;1883;1884;1885	133;462;590;1174;1182
Q61398;D3YUE2;D3YZE3;F6QJE1;D3YWH0	Q61398;D3YUE2;D3YZE3	Procollagen C-endopeptidase enhancer 1	Pcolce	23	23	23	71.4	492270000000	82886000000	79051000000	73438000000	42029000000	25785000000	60493000000	39631000000	29750000000	13046000000	46165000000	90807000000	90278000000	86130000000	72679000000	65177000000	61605000000	52427000000	39092000000	40477000000	46647000000	2915;3022;3681;4528;10955;10956;12051;12187;14256;14257;15012;16350;16374;30046;32356;33487;36818;38147;39165;41258;44253;48232;48303	True;True;True;True;True;True;True;True;True;True;True;True;True;True;True;True;True;True;True;True;True;True;True	3238;3348;3349;4061;4981;12023;12024;13203;13351;15646;15647;15648;15649;16500;17977;18002;33593;33594;36240;37487;41096;42556;43672;45980;49333;49334;53709;53797	33664;33665;33666;33667;33668;33669;33670;33671;33672;33673;33674;33675;33676;33677;33678;33679;33680;33681;33682;33683;33684;33685;33686;33687;33688;33689;33690;33691;33692;33693;33694;33695;33696;33697;33698;33699;33700;33701;33702;33703;33704;33705;33706;33707;33708;33709;33710;33711;33712;33713;33714;33715;33716;33717;33718;33719;33720;33721;33722;33723;33724;33725;33726;33727;33728;33729;337…	23577;23578;23579;23580;23581;23582;23583;23584;23585;23586;23587;23588;23589;23590;23591;23592;23593;23594;23595;23596;23597;23598;23599;23600;23601;23602;23603;23604;23605;23606;23607;23608;23609;23610;23611;23612;23613;23614;23615;23616;23617;23618;23619;23620;23621;23622;23623;23624;23625;23626;23627;23628;23629;23630;23631;23632;23633;23634;23635;23636;23637;23638;23639;23640;23641;23642;236…	23636;24440;29287;36448;88806;88811;97167;98326;115933;115968;123955;136022;136228;253744;273870;283048;307874;317979;325675;342699;369452;402011;402827	3763;3764;3765;3766	83;130;198;424
Q07079	Q07079	Insulin-like growth factor-binding protein 5	Igfbp5	19	19	19	66.1	485030000000	83142000000	56010000000	66637000000	46716000000	29982000000	59162000000	38895000000	36402000000	12560000000	55520000000	72527000000	60219000000	63212000000	65895000000	62190000000	53586000000	51390000000	42176000000	45672000000	53302000000	2427;4138;4139;4603;9308;10519;13851;15462;17234;18447;18840;26753;32951;34011;34012;35965;36088;40416;44997	True;True;True;True;True;True;True;True;True;True;True;True;True;True;True;True;True;True;True	2668;2669;4559;4560;5062;10210;10211;11557;11558;15201;16984;18945;20269;20270;20709;29453;29454;36893;38071;38072;40184;40318;40319;45047;50146;50147	27617;27618;27619;27620;27621;27622;27623;27624;27625;27626;27627;27628;27629;27630;27631;27632;27633;27634;27635;27636;27637;27638;27639;27640;27641;27642;27643;27644;27645;27646;27647;27648;27649;27650;27651;27652;27653;27654;27655;27656;27657;27658;27659;27660;27661;27662;27663;27664;27665;27666;27667;27668;27669;27670;27671;27672;27673;27674;27675;27676;27677;27678;27679;27680;27681;27682;276…	19375;19376;19377;19378;19379;19380;19381;19382;19383;19384;19385;19386;19387;19388;19389;19390;19391;19392;19393;19394;19395;19396;19397;19398;19399;19400;19401;19402;19403;19404;19405;19406;19407;19408;19409;19410;19411;19412;19413;19414;19415;19416;19417;19418;19419;19420;19421;19422;19423;19424;19425;19426;19427;19428;19429;19430;19431;19432;19433;19434;19435;19436;19437;19438;19439;19440;194…	19474;33470;33478;37057;76361;86096;112754;127794;143955;155254;159324;225527;278800;287106;287109;301264;302242;335184;376283	3313;3314;3315;3316;3317;3318	36;56;126;182;195;253
Q64523;Q6GSS7;F8WIX8	Q64523;Q6GSS7;F8WIX8	Histone H2A type 2-C;Histone H2A type 2-A;Histone H2A	Hist2h2ac;Hist2h2aa1;Hist1h2al	7	7	0	58.1	481520000000	79126000000	62879000000	64064000000	48140000000	31546000000	52396000000	38544000000	31781000000	19254000000	53790000000	69697000000	69677000000	62548000000	98918000000	110550000000	41849000000	54405000000	47251000000	56373000000	48809000000	1390;18375;18377;30413;44449;44450;46897	True;True;True;True;True;True;True	1532;20194;20196;34073;49547;49548;49549;52258	15541;15542;15543;15544;15545;15546;15547;15548;15549;15550;15551;15552;15553;15554;15555;15556;15557;15558;15559;15560;15561;15562;15563;216644;216645;216646;216647;216648;216649;216650;216651;216652;216653;216654;216655;216656;216657;216658;216659;216660;216661;216662;216663;216664;216665;216666;216667;216668;216669;216670;216671;216672;216673;216674;216675;216676;216677;216678;216679;216680;21…	10863;10864;10865;10866;10867;10868;10869;10870;10871;10872;10873;10874;10875;10876;10877;10878;10879;10880;10881;10882;10883;10884;10885;10886;10887;10888;10889;10890;10891;10892;10893;10894;10895;10896;10897;10898;10899;10900;10901;154559;154560;154561;154562;154563;154564;154565;154566;154567;154568;154569;154570;154571;154572;154573;154574;154575;154576;154577;154578;154579;154580;154581;1545…	10875;154559;154687;256982;371414;371417;391507	1194	52
Q02788	Q02788	Collagen alpha-2(VI) chain	Col6a2	48	48	12	49.4	473980000000	84408000000	71780000000	68860000000	36151000000	22503000000	58961000000	28332000000	34892000000	15407000000	52682000000	86284000000	84674000000	74405000000	71423000000	60289000000	61093000000	47301000000	45402000000	53040000000	56726000000	1986;1987;3736;5494;6000;7800;7801;11182;12030;13829;13830;14494;14495;14662;14767;15567;16310;16486;16769;17067;17460;17701;17807;17837;23545;24251;24634;30680;31121;31232;31233;31497;33474;34138;34839;35649;35902;35903;36016;36058;42550;44237;44704;44705;44706;45943;46511;48560	True;True;True;True;True;True;True;True;True;True;True;True;True;True;True;True;True;True;True;True;True;True;True;True;True;True;True;True;True;True;True;True;True;True;True;True;True;True;True;True;True;True;True;True;True;True;True;True	2193;2194;2195;2196;4121;6025;6586;8557;8558;8559;8560;12264;13181;15173;15174;15909;15910;16101;16227;17095;17096;17933;18131;18447;18771;19191;19448;19449;19567;19603;25924;26692;27107;34371;34854;34978;34979;35297;35298;37474;38209;38978;38979;39850;40117;40118;40239;40286;47464;49310;49819;49820;49821;51226;51844;54071	22533;22534;22535;22536;22537;22538;22539;22540;22541;22542;22543;22544;22545;22546;22547;22548;22549;22550;22551;22552;22553;22554;22555;22556;22557;22558;22559;22560;22561;22562;22563;22564;22565;22566;22567;22568;22569;22570;22571;22572;22573;22574;22575;22576;22577;22578;22579;22580;22581;22582;22583;22584;22585;42569;42570;42571;42572;42573;42574;42575;42576;42577;42578;42579;42580;42581;425…	15716;15717;15718;15719;15720;15721;15722;15723;15724;15725;15726;15727;15728;15729;15730;15731;15732;15733;15734;15735;15736;15737;15738;15739;15740;15741;15742;15743;15744;15745;15746;15747;15748;15749;15750;15751;15752;15753;15754;15755;29710;29711;29712;29713;29714;29715;29716;29717;29718;29719;29720;29721;29722;29723;29724;29725;29726;29727;29728;29729;44040;44041;44042;44043;44044;44045;440…	15723;15751;29718;44063;48577;63982;64007;90524;97002;112551;112553;117953;117954;119722;121135;128660;135622;137809;140308;142824;146163;148062;149071;149494;200127;205349;208517;258927;262945;263810;263812;266340;283011;288105;293064;298553;300690;300692;301641;301976;354374;369019;373638;373673;373699;384063;388342;404652	526;527;528;3255;3256	234;610;777;979;997
P20029	P20029	78 kDa glucose-regulated protein	Hspa5	38	35	35	58.6	471790000000	51218000000	49607000000	46522000000	26880000000	18478000000	77546000000	52850000000	49315000000	25223000000	74147000000	48887000000	55180000000	52408000000	53562000000	55502000000	72798000000	78074000000	76714000000	84263000000	74075000000	1914;2439;5030;6861;8548;9781;11168;12237;17386;19474;19623;19756;20316;20318;21808;21854;22359;22837;22907;25218;28131;28878;28879;30534;30806;31665;33611;35564;37443;39494;41055;41667;43158;44040;45234;45760;46889;47481	True;True;True;True;True;True;True;True;True;True;True;True;False;True;True;True;True;True;True;False;True;True;True;True;True;True;True;True;True;True;True;True;True;False;True;True;True;True	2118;2685;5527;5528;7552;9375;10723;12249;13404;13405;19112;21398;21558;21704;22324;22326;24040;24090;24634;25149;25221;27736;30953;31753;31754;34212;34507;35485;37630;39760;41780;44035;45757;45758;46434;48137;49098;50399;50985;50986;52249;52900	21853;21854;21855;21856;21857;21858;21859;21860;21861;21862;21863;27871;27872;27873;27874;27875;27876;27877;27878;27879;27880;27881;27882;27883;27884;27885;27886;27887;27888;27889;57710;57711;57712;57713;57714;57715;57716;57717;57718;57719;57720;57721;57722;57723;57724;57725;57726;57727;57728;57729;57730;57731;57732;57733;57734;57735;57736;57737;57738;57739;57740;57741;57742;57743;57744;57745;577…	15246;15247;15248;15249;15250;15251;15252;15253;15254;15255;19595;19596;19597;19598;19599;19600;19601;40441;40442;40443;40444;40445;40446;40447;40448;40449;40450;40451;40452;40453;40454;40455;40456;40457;40458;40459;40460;40461;40462;40463;40464;40465;40466;40467;40468;40469;40470;40471;40472;40473;40474;40475;40476;55879;55880;55881;55882;55883;55884;55885;55886;55887;55888;55889;55890;55891;558…	15252;19599;40463;55943;70219;80212;90408;98782;145043;164754;165967;167099;171740;171788;185322;185680;190463;194194;194719;213131;236541;242342;242348;257904;260097;267674;284038;297935;312693;327976;340635;346716;359411;367082;378311;382322;391396;396780	2153;2154;2155;2156	149;197;264;333
P18760;F8WGL3;E9Q1T2	P18760;F8WGL3;E9Q1T2	Cofilin-1	Cfl1	15	15	13	77.7	471270000000	59625000000	49279000000	62863000000	32633000000	23547000000	65602000000	48148000000	45786000000	23306000000	60478000000	59052000000	53653000000	68079000000	68903000000	70029000000	64872000000	76215000000	65781000000	92372000000	74204000000	3347;3943;3944;7195;8497;9533;17878;22355;24688;24689;29561;30946;39869;39870;48149	True;True;True;True;True;True;True;True;True;True;True;True;True;True;True	3694;3695;4351;4352;7913;9320;10453;19648;24630;27164;27165;32789;32790;34663;44442;44443;53612	38406;38407;38408;38409;38410;38411;38412;38413;38414;38415;38416;38417;38418;38419;38420;38421;38422;38423;38424;45102;45103;45104;45105;45106;45107;45108;45109;45110;45111;45112;45113;45114;45115;45116;45117;45118;45119;45120;45121;45122;45123;45124;45125;45126;45127;45128;45129;45130;45131;45132;45133;45134;45135;45136;45137;45138;45139;45140;45141;45142;45143;45144;45145;45146;82464;82465;824…	26821;26822;26823;26824;26825;26826;26827;26828;26829;26830;26831;26832;26833;26834;26835;26836;26837;31561;31562;31563;31564;31565;31566;31567;31568;31569;31570;31571;31572;31573;31574;31575;31576;31577;31578;31579;31580;31581;31582;31583;31584;31585;31586;31587;31588;31589;31590;31591;31592;31593;31594;31595;31596;31597;31598;31599;31600;31601;31602;31603;31604;31605;31606;31607;31608;31609;316…	26825;31573;31594;58646;69763;78115;149864;190415;208942;208969;248853;261516;330852;330854;401252	2115	115
E9PV77;P84244;E0CZ27;F8WI35;E0CYN1;E0CYR7;E9PZA5	E9PV77;P84244;E0CZ27;F8WI35	Histone H3.3;Histone H3	H3f3a	7	7	2	53.7	466940000000	78378000000	60781000000	71537000000	52366000000	24655000000	44191000000	35541000000	26057000000	15497000000	57937000000	75775000000	85283000000	73805000000	108640000000	73350000000	37904000000	67209000000	47650000000	58664000000	54527000000	9406;13414;22852;37046;39950;39951;49329	True;True;True;True;True;True;True	10320;14714;25164;41342;44527;44528;54915	108386;108387;108388;108389;108390;108391;108392;108393;153609;153610;153611;153612;153613;153614;153615;153616;153617;153618;153619;153620;153621;153622;153623;153624;153625;153626;153627;153628;153629;153630;153631;153632;153633;153634;153635;153636;153637;153638;273977;273978;273979;273980;273981;273982;443587;443588;443589;443590;443591;443592;443593;443594;443595;443596;443597;443598;443599;…	77255;77256;77257;77258;108759;108760;108761;108762;108763;108764;108765;108766;108767;108768;108769;108770;108771;108772;108773;108774;108775;108776;108777;108778;108779;108780;108781;108782;194262;194263;309666;309667;331338;331339;331340;331341;331342;331343;331344;331345;331346;331347;331348;331349;331350;331351;331352;331353;331354;331355;331356;331357;331358;331359;331360;331361;331362;3313…	77255;108769;194262;309666;331338;331372;411099
P21107-2;D3Z2H9	P21107-2;D3Z2H9		Tpm3-rs7	32	24	0	82.7	465790000000	67221000000	47116000000	58655000000	37289000000	27189000000	56336000000	46921000000	38941000000	23342000000	62777000000	63534000000	45970000000	53523000000	57489000000	54080000000	48534000000	51734000000	40361000000	47555000000	52686000000	78;872;1487;2223;3190;3191;4607;4765;8067;8467;8674;10239;10623;10624;11443;18148;18149;21314;21315;21377;21378;22933;23339;26320;28448;28449;28451;29297;29590;36170;36171;41476	False;True;True;True;True;True;True;True;True;False;True;True;True;True;True;True;True;False;False;True;True;False;False;True;True;True;True;True;True;False;False;True	84;960;1637;2449;3528;3529;5066;5242;8849;9283;9509;11213;11214;11671;11672;12541;19941;19942;23479;23480;23545;23546;25248;25704;28924;31290;31291;31293;32349;32350;32837;32838;32839;40404;40405;46222	825;826;9842;9843;9844;9845;9846;9847;9848;9849;16651;16652;16653;16654;16655;16656;16657;16658;16659;25004;25005;25006;25007;25008;36661;36662;36663;36664;36665;36666;36667;36668;36669;36670;36671;36672;36673;36674;36675;36676;36677;36678;36679;36680;36681;36682;36683;36684;36685;36686;36687;36688;36689;36690;36691;36692;36693;36694;36695;36696;36697;36698;52994;52995;52996;52997;52998;52999;530…	610;611;612;613;6885;6886;6887;6888;11628;11629;11630;11631;11632;11633;17504;17505;25581;25582;25583;25584;25585;25586;25587;25588;25589;25590;25591;25592;25593;25594;25595;25596;25597;25598;25599;25600;25601;25602;25603;25604;25605;25606;25607;37072;37073;37074;37075;37076;37077;38394;38395;38396;38397;38398;38399;38400;38401;38402;38403;66207;69442;69443;69444;69445;69446;69447;69448;69449;694…	611;6885;11631;17505;25585;25603;37073;38399;66207;69442;71317;83793;86733;86751;92308;152586;152594;180766;180832;181311;181332;194938;198304;221367;238714;238729;238762;246252;249176;302965;302973;345081	765;766;767;768	105;157;237;248
P06745;F6SAC3;CON__Q3ZBD7	P06745;F6SAC3	Glucose-6-phosphate isomerase	Gpi;Gm1840	32	32	32	65.9	458840000000	65628000000	61661000000	72980000000	27835000000	16749000000	58712000000	40682000000	37332000000	16819000000	60444000000	64996000000	76108000000	77437000000	50007000000	50560000000	54131000000	58686000000	51942000000	59106000000	56576000000	3948;6889;7021;7728;8923;9835;9836;11574;11717;11863;13192;15660;15661;17976;19674;19893;20645;21012;22514;27406;27407;28134;29541;29542;38450;38451;39236;41186;41696;43778;44272;47420	True;True;True;True;True;True;True;True;True;True;True;True;True;True;True;True;True;True;True;True;True;True;True;True;True;True;True;True;True;True;True;True	4356;7585;7729;8477;8478;9785;10779;10780;12684;12685;12686;12842;12998;12999;14474;17201;17202;19755;21611;21853;21854;22682;22683;23144;24801;30167;30168;30956;30957;32746;32747;32748;32749;42884;42885;42886;42887;43751;45902;46466;48815;49355;52836	45173;45174;45175;45176;45177;45178;45179;45180;45181;79260;79261;79262;79263;79264;80545;80546;88765;88766;88767;88768;88769;88770;88771;88772;88773;88774;88775;88776;88777;88778;88779;88780;88781;88782;88783;88784;88785;88786;88787;88788;102479;102480;102481;102482;102483;102484;102485;102486;102487;102488;102489;102490;102491;113149;113150;113151;113152;113153;113154;113155;113156;113157;11315…	31637;31638;31639;31640;31641;56252;56253;57161;63395;63396;63397;63398;63399;63400;63401;63402;63403;63404;63405;63406;73088;73089;73090;73091;73092;73093;73094;73095;73096;80572;80573;80574;80575;80576;80577;80578;80579;80580;80581;80582;80583;80584;80585;80586;93186;93187;93188;93189;93190;93191;93192;93193;93194;93195;93196;93197;93198;93199;93200;93201;93202;93203;93204;93205;93206;93207;932…	31638;56252;57161;63395;73088;80580;80586;93226;94485;95593;106925;129423;129427;150858;166340;168054;175025;178172;191755;230662;230675;236586;248531;248571;320342;320350;326204;341845;346904;364759;369652;396110	1742;1743;1744;1745;1746;1747;1748;1749;1750;1751	65;67;84;119;166;357;401;437;493;504
Q6IRU2	Q6IRU2	Tropomyosin alpha-4 chain	Tpm4	26	21	21	76.2	456980000000	66114000000	51486000000	64213000000	31406000000	28898000000	62179000000	40280000000	37550000000	20212000000	54637000000	75195000000	65137000000	69228000000	56918000000	72168000000	61615000000	63224000000	50852000000	58474000000	59325000000	78;822;823;1006;1381;3003;4430;8467;8779;9731;18218;18219;18220;21215;21216;21306;21307;22933;28463;29279;32128;35515;36168;36169;38591;41477	False;True;True;True;True;True;False;False;True;True;True;True;True;True;True;True;True;False;True;True;False;True;True;True;True;True	84;905;906;1108;1522;1523;3328;4875;9283;9631;10669;20020;20021;20022;23369;23370;23471;23472;25248;31305;32322;32323;32324;35992;39705;40402;40403;43033;46223	825;826;9195;9196;9197;9198;9199;9200;9201;9202;9203;9204;9205;9206;9207;9208;9209;9210;9211;9212;9213;9214;9215;9216;9217;9218;9219;9220;11343;11344;11345;11346;11347;11348;11349;11350;15460;15461;15462;15463;15464;15465;15466;15467;15468;15469;15470;15471;15472;15473;34701;34702;34703;34704;34705;34706;34707;34708;34709;34710;34711;34712;34713;34714;34715;34716;34717;34718;34719;34720;34721;347…	610;611;612;613;6406;6407;6408;6409;6410;6411;6412;6413;6414;6415;6416;6417;6418;6419;6420;6421;6422;6423;6424;7887;7888;7889;7890;7891;7892;10806;10807;10808;10809;10810;10811;10812;10813;10814;10815;10816;10817;10818;10819;10820;10821;10822;10823;10824;24265;24266;24267;24268;24269;24270;24271;24272;24273;24274;24275;24276;24277;24278;24279;24280;24281;24282;24283;24284;24285;24286;24287;24288;…	611;6406;6411;7888;10806;24265;35704;69442;72155;79870;153144;153147;153152;179899;179947;180660;180700;194938;239122;246070;272112;297533;302945;302955;321403;345091	3998;3999	105;110
P10107;E9QA30	P10107;E9QA30	Annexin A1	Anxa1	33	33	32	76.9	442090000000	68121000000	65534000000	60106000000	33601000000	20227000000	57943000000	36014000000	36110000000	12139000000	52298000000	63830000000	68247000000	64892000000	68401000000	63293000000	55071000000	50046000000	55718000000	50726000000	50228000000	446;447;448;2014;2015;2230;2461;2634;4308;4619;4743;6222;6223;12861;15248;15826;17040;17239;17240;20795;22470;22941;32896;32897;36980;37619;37869;42209;42210;44371;47544;48580;49425	True;True;True;True;True;True;True;True;True;True;True;True;True;True;True;True;True;True;True;True;True;True;True;True;True;True;True;True;True;True;True;True;True	485;486;487;2226;2227;2457;2708;2709;2933;2934;4741;5078;5220;6826;6827;14082;16757;17373;18743;18950;18951;22857;24751;25258;36834;36835;41270;41976;41977;42248;47082;47083;47084;49464;52967;54093;55020	4770;4771;4772;4773;4774;4775;4776;4777;4778;4779;4780;4781;4782;4783;4784;4785;4786;4787;4788;4789;4790;4791;4792;4793;4794;4795;4796;4797;4798;4799;4800;4801;4802;4803;4804;4805;4806;4807;4808;4809;4810;4811;4812;4813;4814;4815;4816;4817;4818;4819;4820;22889;22890;22891;22892;22893;22894;22895;22896;22897;22898;22899;22900;22901;22902;22903;22904;22905;22906;22907;22908;22909;22910;22911;25065;…	3385;3386;3387;3388;3389;3390;3391;3392;3393;3394;3395;3396;3397;3398;3399;3400;3401;3402;3403;3404;3405;3406;3407;3408;3409;3410;3411;3412;3413;3414;3415;3416;3417;3418;3419;3420;3421;3422;3423;3424;3425;3426;3427;3428;3429;16002;16003;16004;16005;16006;16007;16008;16009;16010;16011;16012;16013;16014;16015;17543;17544;17545;17546;17547;17548;17549;17550;17551;17552;19740;19741;19742;19743;19744;…	3385;3389;3413;16011;16015;17548;19811;21429;34775;37148;38207;50284;50289;104009;126072;130855;142637;143995;144008;176255;191296;194990;278320;278342;309110;314068;315691;351546;351564;370617;397199;404858;412104	1870;1871;1872;1873	3;111;127;308
G5E8B3;P37889	G5E8B3;P37889	Fibulin-2	Fbln2	47	47	1	56	441360000000	71530000000	59104000000	68298000000	38781000000	20353000000	61233000000	30704000000	29196000000	10368000000	51791000000	71012000000	73268000000	70180000000	70480000000	61314000000	55384000000	49970000000	42373000000	44345000000	50266000000	781;836;841;1421;2454;4276;4434;4635;4775;4875;5480;6321;6474;9090;12100;13441;14226;14436;16176;16177;16846;17590;17767;17768;20019;21488;21489;21801;26415;30176;31567;33795;33797;34227;34248;36378;36627;37041;37380;37706;39215;40244;40705;42740;45988;46409;48082	True;True;True;True;True;True;True;True;True;True;True;True;True;True;True;True;True;True;True;True;True;True;True;True;True;True;True;True;True;True;True;True;True;True;True;True;True;True;True;True;True;True;True;True;True;True;True	860;919;920;927;1564;2700;4707;4879;5095;5096;5253;5359;6010;6011;6932;7094;9969;13254;14744;15612;15846;17784;17785;18532;19329;19519;19520;21993;23663;23664;23665;23666;24033;29080;33809;33810;35378;37836;37838;38305;38328;40617;40892;41335;41336;41337;41708;41709;42073;43725;44855;44856;45373;47671;51274;51733;51734;53542	8698;8699;8700;8701;8702;8703;8704;8705;8706;8707;8708;8709;8710;8711;8712;8713;8714;8715;8716;8717;8718;8719;9343;9344;9345;9346;9347;9348;9349;9350;9351;9352;9353;9354;9355;9356;9357;9358;9359;9360;9361;9362;9503;9504;9505;9506;9507;9508;9509;9510;9511;9512;9513;9514;9515;9516;9517;9518;9519;9520;9521;9522;15924;15925;15926;15927;15928;15929;15930;15931;15932;15933;15934;28003;28004;28005;28006…	6074;6075;6076;6077;6078;6079;6080;6081;6082;6083;6084;6085;6086;6087;6088;6089;6090;6091;6092;6093;6521;6522;6523;6524;6525;6526;6527;6528;6529;6530;6531;6532;6533;6534;6535;6536;6537;6538;6539;6644;6645;6646;6647;6648;6649;6650;6651;6652;6653;6654;6655;6656;6657;6658;6659;6660;6661;6662;6663;11139;11140;11141;11142;11143;11144;19666;19667;19668;19669;19670;19671;19672;19673;19674;19675;19676;19…	6079;6531;6648;11139;19678;34531;35736;37269;38500;39198;43953;51264;52517;74404;97619;109084;115775;117593;134301;134310;141009;147011;148691;148697;169005;182366;182379;185283;222316;255147;266957;285777;285797;288694;288790;304580;306509;309628;312148;314675;326018;333689;337704;355569;384422;387652;400764	1359;1360;1361;1362;1363;1364;1365;1366;1367	111;338;484;539;570;572;834;1197;1212
Q61598;Q61598-2	Q61598;Q61598-2	Rab GDP dissociation inhibitor beta	Gdi2	34	34	26	81.6	435910000000	58084000000	56939000000	61882000000	31686000000	17541000000	62165000000	41524000000	37987000000	13429000000	54671000000	56657000000	68860000000	65898000000	47486000000	49497000000	57028000000	50639000000	49445000000	47595000000	50281000000	4203;6452;7847;9583;12135;12968;13081;13914;16728;22406;22838;26757;27524;27525;28962;29646;29745;29746;30016;30017;31928;31929;32813;34555;36500;37453;39432;40769;44854;44879;45375;46184;48721;48722	True;True;True;True;True;True;True;True;True;True;True;True;True;True;True;True;True;True;True;True;True;True;True;True;True;True;True;True;True;True;True;True;True;True	4627;7070;8609;10512;13294;14197;14198;14322;15274;18404;24682;25150;29460;29461;30292;30293;30294;30295;31842;32933;32934;33107;33108;33109;33110;33539;33540;33541;33542;33543;33544;35764;35765;36740;38658;40750;40751;41791;41792;43969;45439;49981;50009;50553;50554;51494;51495;54246;54247	48322;48323;48324;48325;48326;48327;48328;48329;48330;48331;48332;48333;48334;48335;48336;48337;48338;48339;48340;48341;73987;73988;73989;73990;73991;73992;73993;73994;73995;73996;73997;73998;73999;74000;74001;74002;74003;74004;74005;74006;90131;90132;90133;90134;90135;90136;90137;90138;90139;90140;110442;110443;110444;110445;110446;110447;110448;110449;110450;110451;110452;110453;110454;110455;1…	33861;33862;33863;33864;33865;33866;33867;33868;33869;33870;33871;33872;33873;33874;33875;33876;33877;33878;33879;33880;52390;52391;52392;52393;52394;52395;52396;52397;52398;52399;52400;52401;52402;52403;52404;52405;52406;64386;64387;64388;64389;64390;64391;64392;64393;64394;78659;78660;78661;78662;78663;78664;78665;78666;78667;78668;78669;78670;78671;78672;78673;78674;78675;78676;78677;78678;786…	33879;52400;64394;78695;97905;104938;105898;113394;140098;190832;194221;225593;231799;231839;242960;249899;250896;250901;253418;253439;270061;270071;277742;290949;305380;312758;327593;338170;375093;375250;379403;386002;405982;405986	2534;3787;3788;3789;3790;3791;3792;3793;3794;3795;3796	1;23;33;66;82;90;132;250;336;424;434
P35700;B1AXW5;B1AXW6;B1AXW4;G3UW54	P35700;B1AXW5;B1AXW6;B1AXW4;G3UW54	Peroxiredoxin-1	Prdx1	19	19	17	88.4	429930000000	54650000000	45656000000	49039000000	34165000000	19981000000	59467000000	42901000000	43084000000	19240000000	61744000000	64183000000	51525000000	54131000000	62706000000	62241000000	60033000000	61958000000	58004000000	67243000000	59966000000	587;3539;6192;15783;18003;18004;20088;22817;26417;28587;32713;34166;34167;34408;36894;40127;41462;49599;49600	True;True;True;True;True;True;True;True;True;True;True;True;True;True;True;True;True;True;True	645;3906;3907;6794;17329;19785;19786;22070;25129;29082;31441;36628;38240;38241;38242;38507;41176;44724;46207;55207;55208	6355;6356;6357;6358;6359;6360;6361;6362;6363;6364;40545;40546;40547;40548;40549;40550;40551;40552;40553;40554;40555;40556;40557;40558;40559;40560;40561;40562;40563;40564;40565;40566;40567;70871;70872;70873;70874;70875;70876;70877;70878;70879;70880;70881;70882;70883;70884;182993;182994;182995;182996;182997;182998;182999;183000;183001;183002;183003;183004;183005;183006;183007;183008;183009;183010;2…	4546;4547;4548;4549;4550;4551;4552;4553;4554;4555;28298;28299;28300;28301;28302;28303;28304;28305;28306;28307;28308;28309;28310;28311;28312;28313;28314;28315;28316;28317;50047;50048;50049;50050;50051;50052;50053;50054;50055;50056;50057;50058;130500;130501;130502;130503;130504;130505;130506;130507;130508;130509;130510;130511;130512;130513;130514;130515;130516;130517;130518;130519;130520;130521;130…	4549;28310;50049;130525;151120;151135;169579;194016;222327;240163;276918;288273;288303;289994;308500;332729;344953;413354;413356	2389;2390	21;100
P27773;F6Q404	P27773	Protein disulfide-isomerase A3	Pdia3	31	30	30	68.3	418740000000	56205000000	48382000000	51262000000	32499000000	16499000000	61639000000	40070000000	39558000000	16520000000	56101000000	54269000000	53114000000	61130000000	61455000000	47171000000	62571000000	53470000000	64494000000	68110000000	56732000000	2093;5114;6420;6564;7003;7703;8291;8292;10023;11753;11933;12753;12823;13884;15063;19846;22416;23236;26457;29124;33697;33698;33699;36235;37682;40514;41169;42904;46529;47350;48656	True;True;True;True;True;False;True;True;True;True;True;True;True;True;True;True;True;True;True;True;True;True;True;True;True;True;True;True;True;True;True	2310;5618;7038;7188;7708;8450;9093;9094;10984;12879;13075;13963;13964;14040;15236;15237;16557;21803;24693;25593;29125;32082;32083;37728;37729;37730;40473;42048;45157;45884;47854;51866;52763;54176	23690;23691;23692;23693;23694;23695;23696;23697;23698;23699;23700;23701;23702;23703;23704;23705;23706;23707;23708;23709;23710;23711;23712;23713;23714;23715;23716;23717;23718;23719;23720;23721;23722;23723;23724;23725;23726;23727;58612;58613;58614;58615;58616;58617;58618;58619;58620;58621;58622;58623;58624;58625;58626;58627;58628;73643;73644;73645;73646;73647;73648;73649;73650;73651;73652;73653;736…	16541;16542;16543;16544;16545;16546;16547;16548;16549;16550;16551;16552;16553;16554;16555;16556;16557;16558;16559;16560;16561;16562;16563;16564;16565;16566;16567;16568;16569;41059;41060;41061;41062;41063;41064;41065;41066;41067;41068;41069;41070;41071;41072;52128;52129;52130;52131;52132;52133;52134;52135;52136;52137;52138;52139;52140;52141;52142;52143;52144;52145;52146;52147;52148;52149;52150;521…	16556;41069;52147;53107;57045;63240;68172;68182;82057;94722;96087;103262;103666;113021;124548;167680;190925;197464;222667;244606;285079;285093;285100;303422;314515;335876;341671;356909;388479;395634;405310	2296;2297;2298	247;338;434
Q6P5H2;Q6P5H2-2	Q6P5H2;Q6P5H2-2	Nestin	Nes	82	82	81	50.9	411110000000	58219000000	49031000000	52726000000	21945000000	24748000000	55731000000	43003000000	34470000000	15464000000	55775000000	61758000000	57486000000	56042000000	47489000000	66366000000	54979000000	63701000000	52059000000	63337000000	58111000000	564;1361;1362;1590;2803;2861;2962;2987;3174;3234;3816;3819;6873;8002;8516;8578;8802;10391;10429;10430;10431;10432;10470;10688;10929;11101;11102;11104;12228;13380;17485;17500;17501;17823;17824;19438;22058;23876;24138;24220;24221;24439;25716;29227;29953;30728;32939;32940;33049;34195;35553;36278;36333;36626;38528;38601;38611;38642;38683;39235;39238;39239;39240;39699;39708;40901;41400;41494;41747;417…	True;True;True;True;True;True;True;True;True;True;True;True;True;True;True;True;True;True;True;True;True;True;True;True;True;True;True;True;True;True;True;True;True;True;True;True;True;True;True;True;True;True;True;True;True;True;True;True;True;True;True;True;True;True;True;True;True;True;True;True;True;True;True;True;True;True;True;True;True;True;True;True;True;True;True;True;True;True;True;True…	618;1499;1500;1750;3117;3181;3286;3311;3512;3574;4213;4214;4217;7566;8777;9342;9405;9655;11419;11459;11460;11461;11462;11463;11503;11739;11995;12174;12175;12176;12178;13395;14676;19220;19235;19236;19585;19586;21361;24316;26280;26570;26659;26660;26897;28275;32242;32243;32244;33438;33439;34422;36880;36881;36882;36999;38270;39747;40517;40572;40891;42966;43043;43053;43085;43127;43749;43750;43753;4375…	6114;6115;6116;6117;6118;6119;6120;15242;15243;15244;15245;15246;15247;15248;15249;15250;15251;15252;15253;15254;15255;15256;15257;15258;15259;15260;15261;15262;15263;15264;15265;15266;15267;15268;15269;15270;15271;15272;15273;18091;18092;18093;18094;18095;32216;32217;32218;32219;32220;32221;32222;32223;32224;33121;33122;33123;33124;33125;33126;33127;33128;33129;33130;33131;33132;33133;33134;3313…	4372;4373;4374;4375;4376;4377;4378;10654;10655;10656;10657;10658;10659;10660;10661;10662;10663;10664;10665;10666;10667;10668;10669;10670;10671;10672;10673;10674;10675;10676;10677;10678;10679;10680;10681;10682;10683;10684;10685;10686;10687;10688;12615;22506;22507;22508;22509;22510;22511;23194;23195;23196;23197;23198;23199;23200;23201;23202;23203;23204;23205;23206;23207;23208;23209;23210;23211;2321…	4373;10678;10688;12615;22506;23203;23977;24151;25480;26024;30461;30509;56048;65642;69866;70430;72304;85090;85324;85360;85374;85390;85656;87159;88675;89792;89804;89812;98695;108509;146372;146470;146480;149194;149207;164508;187784;202707;204630;205151;205161;206773;216842;245639;252869;259371;278687;278689;279565;288476;297805;304000;304326;306492;320829;321466;321563;321748;322015;326200;326212;32…	4053;4054;4055;4056;4057;4058;4059;4060	201;294;394;616;622;974;1059;1101
Q62261;Q62261-2;Q68FG2;P15508;Q3UGX2;E9Q5I4;E9Q397;F6VV16;D3YWH8;Q149M1	Q62261;Q62261-2	Spectrin beta chain, non-erythrocytic 1	Sptbn1	141	141	139	69.2	397580000000	55385000000	49182000000	54765000000	28339000000	18366000000	56501000000	35225000000	33372000000	11818000000	54627000000	55908000000	62292000000	57539000000	53182000000	54057000000	54363000000	50269000000	49276000000	50022000000	51734000000	886;1059;1912;2492;3145;3146;5061;5062;5113;5231;5440;5766;5782;6320;6580;6694;6695;6699;6769;7502;7596;7638;7778;7999;8129;8130;9079;9196;9430;9475;9484;9485;9569;9755;10803;10804;10805;11372;11415;11661;11970;12006;12302;12415;12999;13103;13104;13378;14516;16211;16737;17728;17830;18330;18497;18605;18631;18672;18692;18973;19349;19835;20101;20910;21739;21740;22100;22480;22616;22617;22805;23045;23…	True;True;True;True;True;True;True;True;True;True;True;True;True;True;True;True;True;True;True;True;True;True;True;True;True;True;True;True;True;True;True;True;True;True;True;True;True;True;True;True;True;True;True;True;True;True;True;True;True;True;True;True;True;True;True;True;True;True;True;True;True;True;True;True;True;True;True;True;True;True;True;True;True;True;True;True;True;True;True;True…	976;1167;2116;2744;3480;3481;5559;5560;5561;5617;5746;5966;6328;6344;6345;6931;7210;7211;7338;7339;7344;7429;8239;8337;8382;8532;8772;8773;8916;8917;9956;9957;10085;10086;10345;10392;10401;10402;10497;10696;11863;11864;11865;12462;12510;12781;12782;13117;13156;13476;13477;13598;14232;14356;14357;14358;14674;15936;17822;18413;19477;19594;20143;20336;20453;20454;20483;20524;20525;20547;20855;21265;…	10002;10003;10004;10005;10006;10007;10008;10009;10010;10011;10012;10013;10014;11944;11945;21849;21850;21851;28556;28557;28558;28559;28560;28561;28562;28563;28564;28565;36108;36109;36110;36111;36112;36113;36114;36115;36116;36117;36118;36119;36120;36121;36122;36123;36124;36125;36126;36127;36128;36129;36130;36131;36132;58076;58077;58078;58079;58080;58081;58082;58083;58084;58085;58086;58087;58088;580…	6979;6980;6981;6982;6983;6984;6985;6986;6987;6988;6989;8324;15242;15243;15244;20035;20036;20037;20038;25198;25199;25200;25201;25202;25203;25204;25205;25206;25207;25208;25209;25210;25211;25212;25213;25214;25215;25216;25217;25218;40714;40715;40716;40717;40718;40719;40720;40721;40722;40723;40724;40725;40726;40727;40728;40729;40730;40731;40732;40733;40734;40735;40736;40737;40738;40739;41039;41040;410…	6988;8324;15242;20035;25203;25212;40719;40726;41040;42131;43635;46315;46510;51256;53254;54252;54261;54290;55136;61547;62412;62745;63735;65627;66801;66802;74332;75376;77472;77699;77781;77783;78593;80022;87880;87897;87902;91773;92070;94055;96438;96810;99291;100280;105167;106079;106084;108488;118153;134525;140145;148408;149376;154255;155718;156896;157320;157672;157792;161022;163824;167592;169647;177…	3849;3850;3851;3852;3853;3854;3855;3856;3857;3858;3859;3860;3861;3862;3863;3864;3865;3866;3867;3868;3869;3870;3871;3872;3873;3874;3875;3876;3877;3878;3879;3880;3881	133;185;206;526;547;616;687;704;854;898;992;1047;1090;1215;1218;1269;1295;1301;1320;1338;1361;1424;1429;1468;1505;1735;1845;1924;1950;2140;2144;2149;2199
A2ASS6;F6ZVZ7;F7CR78;F6ZZ75;A2AT62;F6Q6Z0;F6ZRX7;A2AT61	A2ASS6;F6ZVZ7	Titin	Ttn	887	887	3	35	396810000000	32629000000	40576000000	43972000000	13683000000	10457000000	66145000000	48801000000	45266000000	16121000000	79157000000	34991000000	48736000000	44245000000	37457000000	44578000000	56927000000	66332000000	68865000000	80784000000	68519000000	23;38;93;357;437;470;476;585;605;622;643;693;756;771;819;826;896;897;925;935;936;1262;1276;1285;1345;1353;1452;1457;1462;1466;1477;1499;1750;2028;2029;2300;2327;2356;2510;2521;2674;2692;2704;2751;2754;2768;2879;2889;3095;3305;3323;3363;3405;3602;3604;3605;3649;3653;3655;3658;3693;3694;3697;3728;3847;3873;3996;4001;4002;4011;4100;4133;4178;4184;4429;4767;4773;4791;4857;4882;4962;4963;5021;5041;516…	True;True;True;True;True;True;True;True;True;True;True;True;True;True;True;True;True;True;True;True;True;True;True;True;True;True;True;True;True;True;True;True;True;True;True;True;True;True;True;True;True;True;True;True;True;True;True;True;True;True;True;True;True;True;True;True;True;True;True;True;True;True;True;True;True;True;True;True;True;True;True;True;True;True;True;True;True;True;True;True…	26;42;99;390;391;476;512;518;643;664;684;713;770;834;849;902;909;988;989;1022;1032;1033;1386;1401;1410;1481;1489;1597;1602;1609;1613;1627;1650;1933;2240;2241;2530;2562;2593;2763;2764;2776;2979;3000;3013;3061;3064;3079;3202;3212;3426;3649;3667;3711;3757;3978;3980;3981;4027;4031;4033;4036;4074;4075;4078;4113;4248;4275;4408;4413;4414;4423;4519;4554;4601;4607;4874;5244;5250;5269;5339;5366;5452;5453;5…	239;240;241;242;448;449;450;451;452;453;454;455;456;457;458;459;460;461;462;463;464;465;466;467;926;927;928;929;930;931;932;933;3821;3822;3823;3824;3825;3826;3827;3828;3829;3830;3831;3832;4710;4711;4712;5074;5075;5076;5077;5078;5079;5080;5081;5082;5083;5084;5148;5149;5150;5151;6346;6347;6562;6753;6754;6755;6756;6757;6758;6759;6760;6761;7216;7704;7705;7706;7707;7708;7709;8434;8435;8436;8437;8438;8…
P10853;Q64475;Q8CGP2;Q8CGP2-2;Q6ZWY9;Q64478;P10854;Q64525;Q8CGP1;Q8CBB6;Q921L4;Q9D2U9;P70696;Q8CGP0;Q64524;G3X9D5	P10853;Q64475;Q8CGP2;Q8CGP2-2;Q6ZWY9;Q64478;P10854;Q64525;Q8CGP1;Q8CBB6;Q921L4;Q9D2U9;P70696;Q8CGP0;Q64524	Histone H2B type 1-F/J/L;Histone H2B type 1-B;Histone H2B type 1-P;Histone H2B type 1-C/E/G;Histone H2B type 1-H;Histone H2B type 1-M;Histone H2B type 2-B;Histone H2B type 1-K;Histone H2B;Histone H2B type 3-A;Histone H2B type 1-A;Histone H2B type 3-B;Histone H2B type 2-E	Hist1h2bf;Hist1h2bb;Hist1h2bp;Hist1h2bc;Hist1h2bh;Hist1h2bm;Hist2h2bb;Hist1h2bk;Gm13646;Hist3h2ba;Hist1h2ba;Hist3h2bb;Hist2h2be	12	12	12	73	389530000000	57544000000	51820000000	53126000000	43412000000	25110000000	33931000000	37457000000	27129000000	18647000000	41349000000	43085000000	51610000000	52714000000	64814000000	66598000000	25137000000	39816000000	29694000000	40679000000	34888000000	2598;9580;11156;17751;17752;19195;22394;23134;25936;35308;36849;45419	True;True;True;True;True;True;True;True;True;True;True;True	2873;2874;2875;10509;12236;19500;19501;21095;24670;25471;28508;39483;41127;50603	29848;29849;29850;29851;29852;29853;29854;29855;29856;29857;29858;29859;29860;29861;29862;29863;29864;29865;29866;29867;29868;29869;29870;29871;29872;29873;29874;29875;29876;29877;29878;29879;29880;29881;29882;29883;29884;29885;29886;29887;29888;29889;29890;29891;29892;29893;29894;29895;29896;29897;29898;29899;29900;29901;29902;29903;29904;29905;29906;29907;29908;29909;29910;29911;29912;29913;299…	20913;20914;20915;20916;20917;20918;20919;20920;20921;20922;20923;20924;20925;20926;20927;20928;20929;20930;20931;20932;20933;20934;20935;20936;20937;20938;20939;20940;20941;20942;20943;20944;20945;20946;20947;20948;20949;20950;20951;20952;20953;20954;20955;20956;20957;20958;20959;20960;20961;20962;20963;20964;20965;20966;20967;20968;20969;20970;20971;20972;20973;20974;20975;20976;20977;20978;209…	21121;78639;90297;148589;148591;162672;190715;196405;218564;296192;308121;379754	1917;1918	60;63
P01887;Q91XJ8	P01887;Q91XJ8	Beta-2-microglobulin	B2m	7	7	7	73.1	387980000000	60814000000	52447000000	57461000000	36380000000	20741000000	52757000000	30486000000	24070000000	10074000000	42749000000	55681000000	64737000000	53286000000	37997000000	29096000000	45297000000	38327000000	29456000000	10218000000	34499000000	7852;17814;18570;33165;42343;43141;44091	True;True;True;True;True;True;True	8614;19574;19575;20413;20414;37145;37146;47232;48119;48120;49153;49154;49155	90180;90181;90182;90183;90184;90185;90186;90187;90188;90189;90190;90191;90192;90193;90194;90195;90196;90197;90198;90199;90200;90201;90202;90203;90204;90205;90206;90207;90208;90209;90210;90211;90212;90213;90214;90215;90216;90217;90218;90219;90220;90221;90222;90223;90224;90225;90226;90227;90228;90229;90230;90231;90232;90233;90234;90235;90236;90237;90238;90239;208417;208418;208419;208420;208421;2084…	64418;64419;64420;64421;64422;64423;64424;64425;64426;64427;64428;64429;64430;64431;64432;64433;64434;64435;64436;64437;64438;64439;64440;64441;64442;64443;64444;64445;64446;64447;64448;64449;64450;64451;64452;64453;64454;64455;64456;64457;64458;64459;64460;64461;64462;64463;64464;64465;64466;64467;64468;64469;64470;64471;64472;64473;64474;149118;149119;149120;149121;149122;149123;149124;149125;1…	64419;149124;156460;280717;352693;359287;367436	1701;1702;1703;1704;1705	59;71;74;107;119
P16858;E9PX42;E9Q9E5;E9PX72;E9Q1S8;F6ZQM8;E9Q0E3;E9Q5U3;F8WJL5;D3YUV0;E9PXL6;E9PZL2;E9PZH9;D3YYI5;D3YV03;E9PYX4;D3YU05;D3Z0Z9;E9Q1F8;E9PZP4;D3Z1B7;F6QXU4;E9PX99;F6UT49;Q64467;E9QP42;F7D6E8;Q8BJ40	P16858;E9PX42;E9Q9E5;E9PX72;E9Q1S8;F6ZQM8;E9Q0E3;E9Q5U3;F8WJL5;D3YUV0;E9PXL6;E9PZL2;E9PZH9;D3YYI5;D3YV03;E9PYX4;D3YU05	Glyceraldehyde-3-phosphate dehydrogenase	Gapdh;Gm7293;Gm6316	22	22	2	79.9	386870000000	43366000000	37210000000	41536000000	20657000000	14704000000	60802000000	41296000000	45956000000	16449000000	64892000000	35224000000	42424000000	41283000000	33707000000	34150000000	53189000000	53852000000	50613000000	58310000000	61558000000	192;14074;15538;22091;25392;28029;28465;28466;32855;32856;36991;42911;44052;44700;44925;44950;45000;46192;46193;47094;47095;47730	True;True;True;True;True;True;True;True;True;True;True;True;True;True;True;True;True;True;True;True;True;True	207;15446;17066;24353;27929;30837;30838;31307;31308;36790;36791;41282;41283;41284;47861;49111;49112;49815;50059;50060;50086;50087;50088;50150;51507;51508;52481;52482;52483;52484;53162;53163	2230;161797;161798;161799;161800;161801;161802;161803;161804;161805;161806;161807;161808;161809;161810;161811;161812;161813;161814;161815;161816;161817;161818;161819;180087;180088;180089;180090;180091;180092;180093;180094;180095;180096;180097;180098;180099;180100;180101;180102;180103;180104;180105;264406;264407;264408;264409;264410;264411;264412;264413;264414;264415;264416;264417;264418;264419;26…	1605;114515;114516;114517;114518;114519;114520;114521;114522;114523;114524;114525;114526;114527;114528;114529;114530;114531;114532;114533;128329;128330;128331;128332;128333;128334;128335;128336;128337;128338;128339;128340;128341;128342;128343;128344;128345;188056;188057;188058;188059;188060;188061;188062;188063;188064;188065;188066;188067;188068;188069;188070;188071;188072;188073;188074;188075;18…	1605;114523;128338;188074;214486;235694;239161;239181;278010;278018;309194;356942;367168;373602;375627;375895;376311;386153;386179;393459;393498;398416	622;623;624;625;626;627;628;629;630	41;44;103;128;131;173;229;326;329
Q68FD5;Q5SXR6;E9Q434;F6Z1R4	Q68FD5;Q5SXR6	Clathrin heavy chain 1	Cltc	95	95	95	74.9	369620000000	48020000000	37409000000	41492000000	21486000000	13021000000	68187000000	35579000000	33886000000	12246000000	58290000000	49338000000	48894000000	49042000000	42652000000	41994000000	62991000000	48838000000	48171000000	46996000000	55187000000	115;574;1155;1575;1600;1631;1819;2071;2072;3050;3192;3810;4000;4106;4647;6960;7489;8132;8351;9337;11157;11401;12119;12195;13016;13149;13351;13429;16582;16605;16706;17569;17819;17873;17874;18486;18767;19038;20107;21548;21549;22037;22237;22410;22891;23048;23274;23334;23537;23706;23707;23878;25030;25709;25941;26286;26935;27961;27962;29265;29903;31178;31277;31449;31450;31480;32964;32990;34815;35702;3…	True;True;True;True;True;True;True;True;True;True;True;True;True;True;True;True;True;True;True;True;True;True;True;True;True;True;True;True;True;True;True;True;True;True;True;True;True;True;True;True;True;True;True;True;True;True;True;True;True;True;True;True;True;True;True;True;True;True;True;True;True;True;True;True;True;True;True;True;True;True;True;True;True;True;True;True;True;True;True;True…	122;630;1267;1268;1733;1761;1762;1763;1799;1800;2012;2288;2289;3377;3530;4207;4412;4525;5112;7664;8224;8919;9158;10241;12237;12495;13275;13359;14249;14431;14644;14645;14732;18239;18264;18380;19306;19307;19581;19643;19644;20323;20324;20325;20628;20925;22091;23733;23734;24292;24507;24687;25205;25372;25633;25634;25699;25916;26098;26099;26282;27537;28265;28266;28267;28268;28513;28879;29654;30760;3076…	1130;1131;1132;1133;1134;1135;1136;1137;1138;1139;1140;1141;1142;1143;1144;1145;1146;6228;6229;6230;6231;6232;6233;6234;6235;6236;6237;12921;12922;12923;12924;12925;12926;12927;12928;12929;12930;12931;12932;12933;12934;12935;12936;12937;12938;12939;12940;12941;12942;12943;12944;12945;12946;12947;12948;12949;12950;12951;12952;12953;17913;17914;17915;17916;17917;17918;17919;17920;17921;17922;17923;…	810;811;812;813;814;815;816;817;818;4460;4461;4462;4463;4464;4465;8996;8997;8998;8999;9000;9001;9002;9003;9004;9005;9006;9007;9008;9009;9010;9011;12489;12490;12491;12492;12493;12494;12495;12496;12497;12498;12499;12677;12678;12679;12680;12681;12682;12683;12684;12685;12686;12972;12973;12974;12975;12976;12977;12978;12979;12980;12981;12982;12983;12984;12985;12986;12987;14443;14444;14445;16375;16376;1…	815;4460;9010;12489;12678;12972;14445;16399;16405;24625;25610;30412;32543;33292;37365;56748;61465;66810;68627;76538;90324;91979;97774;98392;105271;106612;108306;109018;138887;139073;139906;146885;149184;149800;149810;155654;158564;161548;169767;182865;182888;187588;189489;190884;194636;195689;197787;198245;200073;201394;201404;202735;211581;216819;218687;220987;226958;235259;235272;245914;252378;…	3603;3604;3605;3606;3607;3608;3609;3610;3611;3612;3613;3614;3615;3616;3617;3618;3619;3620;3621;3622;3623;3624	32;55;73;95;104;132;181;206;295;587;590;604;996;1041;1271;1302;1314;1316;1424;1592;1596;1603
P62204;Q3UKW2;G3UX57	P62204;Q3UKW2	Calmodulin	Calm1	11	11	4	85.2	368790000000	51499000000	46669000000	45770000000	21883000000	22478000000	48075000000	38017000000	29774000000	19437000000	45183000000	54074000000	58045000000	50077000000	38795000000	55377000000	45912000000	59129000000	40421000000	67327000000	46419000000	689;5675;5791;7481;7482;7483;8027;8089;9888;29562;38700	True;True;True;True;True;True;True;True;True;True;True	764;765;6227;6356;8216;8217;8218;8802;8803;8804;8874;10836;10837;32791;32792;43145;43146;43147;43148	7630;7631;7632;7633;7634;7635;7636;7637;7638;7639;7640;7641;7642;7643;7644;7645;7646;7647;7648;7649;7650;7651;7652;7653;7654;7655;7656;7657;7658;7659;7660;7661;7662;7663;7664;7665;7666;7667;7668;7669;64592;64593;64594;64595;64596;64597;64598;64599;64600;66095;66096;66097;66098;66099;66100;66101;66102;66103;66104;66105;66106;66107;66108;66109;66110;66111;66112;66113;66114;66115;66116;66117;66118;6…	5375;5376;5377;5378;5379;5380;5381;5382;5383;5384;5385;5386;5387;5388;5389;5390;5391;5392;5393;5394;5395;5396;5397;5398;5399;5400;5401;5402;5403;5404;5405;5406;5407;5408;5409;5410;5411;5412;5413;5414;5415;5416;5417;5418;5419;5420;45393;45394;45395;45396;45397;45398;45399;45400;45401;46567;46568;46569;46570;46571;46572;46573;46574;46575;46576;46577;46578;46579;46580;46581;46582;46583;46584;46585;4…	5396;45393;46595;61263;61352;61387;65865;66485;80983;248863;322194	2165;2798;2799;2800;2801;2802;2803	37;52;72;73;77;145;146
P08228	P08228	Superoxide dismutase [Cu-Zn]	Sod1	11	11	11	63.6	367870000000	53475000000	37685000000	52096000000	27423000000	17311000000	52324000000	34690000000	31707000000	16600000000	44561000000	50586000000	48549000000	46868000000	61451000000	64722000000	50701000000	56511000000	43892000000	71467000000	45862000000	5885;14411;18018;18019;18884;22484;22994;41296;42131;42132;45054	True;True;True;True;True;True;True;True;True;True;True	6461;15817;19800;19801;20756;24766;25313;46023;46985;46986;46987;50206	67386;67387;67388;67389;67390;67391;67392;67393;67394;67395;67396;67397;67398;165705;165706;165707;165708;165709;165710;165711;165712;165713;165714;165715;165716;165717;165718;165719;165720;165721;165722;165723;165724;165725;165726;165727;165728;211627;211628;211629;211630;211631;211632;211633;211634;211635;211636;211637;211638;211639;211640;211641;211642;211643;211644;211645;211646;211647;211648…	47555;47556;47557;47558;47559;47560;47561;47562;47563;47564;117439;117440;117441;117442;117443;117444;117445;117446;117447;117448;117449;117450;117451;117452;117453;117454;117455;117456;117457;117458;117459;151247;151248;151249;151250;151251;151252;151253;151254;151255;151256;151257;151258;151259;151260;151261;151262;151263;151264;151265;151266;159710;159711;159712;159713;159714;159715;159716;159…	47559;117456;151248;151255;159727;191450;195385;343022;350769;350775;376847	1843	118
P13020-2;P13020;A6PWS5	P13020-2;P13020	Gelsolin	Gsn	35	35	20	64.3	365520000000	52076000000	41473000000	52014000000	25908000000	15423000000	56351000000	33275000000	25649000000	11702000000	51650000000	52285000000	50022000000	57053000000	41714000000	35382000000	56007000000	55303000000	41354000000	43719000000	46828000000	3155;3156;3576;5716;6949;10486;10525;11612;12145;15296;18950;30139;30788;32165;32318;33732;34151;35246;36911;37099;37100;37556;37557;37931;39490;40619;40876;41213;42294;42347;46048;46207;46650;47111;48742	True;True;True;True;True;True;True;True;True;True;True;True;True;True;True;True;True;True;True;True;True;True;True;True;True;True;True;True;True;True;True;True;True;True;True	3491;3492;3493;3950;6275;7653;11521;11522;11564;12724;13306;16809;20828;33747;33748;33749;33750;34486;36030;36197;37768;38224;39415;41193;41396;41397;41908;41909;42315;44030;45280;45558;45931;47177;47237;51345;51346;51347;51522;51993;51994;52500;54267	36274;36275;36276;36277;36278;36279;36280;36281;36282;36283;36284;36285;36286;36287;36288;36289;36290;36291;36292;36293;36294;36295;36296;36297;36298;36299;36300;36301;36302;36303;36304;36305;36306;36307;36308;36309;36310;36311;36312;36313;36314;36315;36316;36317;36318;36319;36320;36321;36322;36323;36324;36325;36326;36327;36328;36329;36330;36331;36332;36333;36334;36335;36336;36337;36338;36339;363…	25311;25312;25313;25314;25315;25316;25317;25318;25319;25320;25321;25322;25323;25324;25325;25326;25327;25328;25329;25330;25331;25332;25333;25334;25335;25336;25337;25338;25339;25340;25341;25342;25343;25344;25345;25346;25347;25348;25349;25350;25351;25352;25353;25354;25355;25356;25357;25358;25359;25360;25361;25362;25363;25364;25365;25366;25367;25368;25369;25370;25371;25372;25373;25374;25375;25376;253…	25361;25388;28587;45808;56647;85856;86133;93466;98012;126466;160360;254798;259938;272258;273568;285297;288182;295735;308677;309961;309970;313617;313626;316260;327945;336986;339063;342178;352321;352740;384931;386231;389426;393612;406346	443;1968;1969;1970;1971;1972	1;219;259;382;388;485
E9Q8G0;D3YWD1	E9Q8G0;D3YWD1		Col6a3	117	33	33	82.8	364680000000	57295000000	49838000000	51738000000	32603000000	17722000000	53336000000	24694000000	24441000000	7553300000	45461000000	58866000000	67296000000	59051000000	59555000000	58335000000	48427000000	32431000000	34282000000	29849000000	43258000000	76;413;629;854;883;909;954;2069;2328;5470;5471;5570;5649;6079;6208;6230;6231;7213;7330;7806;7807;8753;9381;9400;9401;9886;10062;10067;11991;12967;13534;15272;15280;15775;16009;16533;16871;17462;17734;18227;18228;18795;19067;19526;19537;19561;19926;20084;20237;21601;21984;22302;22346;24014;24015;26241;26470;27869;28089;29257;30264;30301;30695;30902;30919;30970;31432;31457;32349;32463;32834;33762;3…	False;True;False;False;True;True;False;False;False;False;False;True;True;True;True;False;False;True;False;False;False;False;True;False;False;False;False;False;False;True;False;True;False;True;True;False;False;False;False;True;True;False;False;False;False;False;False;False;False;False;False;False;False;False;False;False;True;True;False;False;False;False;True;False;False;False;True;False;False;Fals…	82;450;693;940;972;973;1002;1051;2286;2563;5998;5999;6105;6199;6672;6810;6835;6836;7931;8054;8565;8566;9595;10292;10293;10312;10313;10314;10315;10834;11025;11030;13139;14196;14848;16782;16791;17321;17570;18188;18557;19193;19483;20029;20030;20031;20032;20659;20956;21452;21467;21493;21891;22064;22232;23791;24236;24575;24621;26429;26430;28833;29139;30659;30660;30899;32288;32289;33914;33951;34387;346…	817;818;819;820;821;822;823;4418;4419;4420;4421;4422;4423;4424;4425;4426;4427;4428;4429;4430;6859;6860;6861;6862;6863;6864;6865;6866;6867;6868;6869;6870;6871;6872;9641;9642;9643;9644;9645;9646;9647;9648;9649;9650;9651;9652;9653;9654;9655;9656;9657;9924;9925;9926;9927;9928;9929;9930;9931;9932;9933;9934;9935;9936;9937;9938;9939;9940;9941;9942;9943;9944;9945;9946;9947;9948;9949;9950;9951;9952;9953;9…	606;607;608;3113;3114;3115;3116;3117;3118;3119;3120;3121;3122;4900;4901;4902;4903;4904;4905;6744;6745;6746;6747;6748;6749;6750;6751;6752;6753;6754;6755;6756;6757;6928;6929;6930;6931;6932;6933;6934;6935;6936;6937;6938;6939;6940;6941;6942;6943;6944;6945;6946;6947;6948;6949;6950;6951;6952;6953;6954;6955;6956;6957;6958;6959;6960;6961;6962;6963;6964;6965;7185;7186;7187;7188;7189;7190;7191;7192;7193;71…	606;3118;4900;6751;6946;7187;7584;16362;18579;43836;43837;44643;45268;49361;50150;50388;50398;58878;59672;64069;64093;71834;76994;77183;77215;80966;82276;82360;96650;104916;109899;126207;126359;130413;132606;138348;141190;146190;148448;153223;153274;158750;161692;165082;165206;165347;168268;169515;170941;183423;187111;190059;190339;203658;203666;220726;222796;234521;236157;245819;255881;256154;25…	595;596;599;604;609;612;614;883;884;885;886	292;438;577;615;620;750;798;1083;1172;1279;1607
P09411;P09041	P09411	Phosphoglycerate kinase 1	Pgk1	25	25	25	75.5	350020000000	43588000000	43521000000	40885000000	23717000000	14765000000	50965000000	34146000000	32712000000	16890000000	48832000000	46585000000	51150000000	43001000000	40710000000	40093000000	47160000000	47537000000	43941000000	52553000000	47066000000	1316;1626;2102;5211;10048;12060;12651;14330;21302;21827;21828;24615;31475;34426;38829;40337;41322;41323;43758;45493;45512;45854;46598;48105;49394	True;True;True;True;True;True;True;True;True;True;True;True;True;True;True;True;True;True;True;True;True;True;True;True;True	1447;1448;1793;1794;2321;5723;11011;13212;13857;15729;23466;23467;24061;24062;27085;35268;38525;43287;43288;44958;44959;44960;46051;46052;46053;48791;48792;50683;50684;50703;51125;51126;51127;51939;53566;54985	14715;14716;14717;14718;14719;14720;14721;14722;14723;14724;14725;14726;14727;14728;14729;14730;14731;14732;14733;14734;18541;18542;18543;18544;18545;18546;18547;18548;18549;18550;18551;18552;18553;18554;18555;18556;18557;18558;18559;18560;18561;18562;18563;18564;18565;18566;18567;18568;18569;18570;18571;18572;18573;18574;18575;18576;18577;18578;18579;18580;18581;18582;18583;23812;23813;23814;238…	10303;10304;10305;10306;10307;10308;10309;10310;10311;10312;12913;12914;12915;12916;12917;12918;12919;12920;12921;12922;12923;12924;12925;12926;12927;12928;12929;12930;12931;12932;12933;12934;12935;12936;12937;12938;16628;16629;16630;16631;16632;16633;16634;16635;16636;16637;16638;16639;16640;16641;16642;16643;16644;16645;16646;16647;16648;16649;16650;16651;16652;16653;16654;41848;41849;41850;418…	10308;12936;16628;41865;82211;97274;102511;116516;180603;185464;185476;208219;266068;290165;323114;334442;343400;343412;364618;380278;380433;383213;389058;400911;411832	1856;1857;1858;1859;1860;1861;1862;1863;1864;1865;1866	29;61;72;176;190;227;234;240;251;312;356
Q9CPU0	Q9CPU0	Lactoylglutathione lyase	Glo1	13	13	13	81.5	347660000000	42988000000	49283000000	41282000000	27603000000	20210000000	43431000000	39244000000	31031000000	13678000000	38912000000	40809000000	58336000000	42299000000	50693000000	64031000000	41331000000	58081000000	41962000000	39882000000	39917000000	944;3634;5557;12235;13586;14975;15677;23596;35845;38557;38558;40666;45340	True;True;True;True;True;True;True;True;True;True;True;True;True	1041;4012;6090;6091;13402;14903;16462;17218;25976;25977;40058;42997;42998;45332;50515	10752;10753;10754;10755;41531;41532;41533;41534;41535;41536;41537;41538;41539;41540;41541;41542;41543;41544;41545;41546;41547;41548;41549;63374;63375;63376;63377;63378;63379;63380;63381;63382;63383;63384;63385;63386;63387;63388;63389;63390;63391;63392;63393;63394;63395;63396;63397;63398;63399;63400;63401;63402;63403;63404;63405;63406;63407;63408;63409;63410;63411;63412;63413;63414;63415;63416;634…	7515;7516;29001;29002;29003;29004;29005;29006;29007;29008;29009;29010;29011;29012;29013;29014;29015;29016;44506;44507;44508;44509;44510;44511;44512;44513;44514;44515;44516;44517;44518;44519;44520;44521;44522;44523;44524;44525;44526;44527;44528;44529;44530;44531;44532;44533;44534;44535;44536;44537;44538;44539;44540;44541;44542;44543;44544;44545;44546;44547;44548;44549;44550;44551;44552;44553;44554…	7516;29004;44575;98746;110212;123669;129509;200512;300227;321087;321099;337398;379073	5089;5090	36;66
O88342	O88342	WD repeat-containing protein 1	Wdr1	31	31	31	79.4	346930000000	48803000000	41380000000	49463000000	21219000000	10792000000	53738000000	32403000000	30404000000	8937700000	49788000000	48466000000	46273000000	49946000000	44861000000	35331000000	53280000000	42946000000	45300000000	40282000000	46162000000	1543;4424;5954;6006;7944;12005;12428;13611;13732;14417;15415;16566;21941;22165;23348;25023;27437;30051;30900;36111;36112;38407;40433;43623;44233;44990;47346;47550;48157;48423;49493	True;True;True;True;True;True;True;True;True;True;True;True;True;True;True;True;True;True;True;True;True;True;True;True;True;True;True;True;True;True;True	1700;4869;6539;6592;8710;13155;13612;14937;15068;15823;16935;18222;24186;24432;24433;25713;27530;30200;33600;33601;33602;34612;40342;40343;42839;45065;48639;49306;50137;52758;52973;53622;53922;55093	17441;17442;17443;17444;17445;17446;17447;17448;17449;17450;17451;17452;17453;17454;17455;17456;17457;17458;17459;17460;17461;17462;17463;17464;17465;17466;17467;17468;50941;50942;50943;50944;50945;50946;50947;50948;50949;50950;50951;50952;50953;50954;50955;50956;50957;50958;50959;50960;50961;50962;50963;50964;50965;68274;68275;68276;68277;68278;68279;68280;68281;68282;68283;68284;68285;68286;682…	12136;12137;12138;12139;12140;12141;12142;12143;12144;12145;12146;12147;12148;12149;12150;12151;12152;12153;12154;12155;12156;12157;12158;12159;12160;12161;12162;12163;12164;12165;12166;35673;35674;35675;35676;35677;35678;35679;35680;35681;35682;35683;35684;35685;35686;35687;35688;35689;35690;35691;48193;48194;48195;48196;48197;48198;48199;48200;48201;48202;48203;48204;48205;48206;48207;48208;482…	12152;35675;48223;48627;65221;96769;100409;110512;111521;117498;127413;138622;186649;188671;198343;211527;230931;253796;261024;302509;302511;319993;335348;363461;368976;376235;395539;397213;401348;403638;412561	1613;1614;1615	274;371;384
Q8VHX6;Q8VHX6-2;D3Z576;D3YW87	Q8VHX6;Q8VHX6-2;D3Z576;D3YW87	Filamin-C	Flnc	103	89	89	52.5	346000000000	45428000000	37755000000	43136000000	19009000000	13534000000	48439000000	33632000000	37183000000	13285000000	54596000000	44895000000	46431000000	46334000000	40950000000	45467000000	46531000000	49252000000	53213000000	58621000000	51047000000	848;1084;1085;1476;1880;1916;2136;2857;2909;3241;3337;4160;4629;5015;5502;5838;5842;5843;5868;6285;6286;6847;7407;7581;8099;8214;8367;11492;11493;11654;12473;12638;12745;13154;13155;13169;13893;14136;14145;14147;14413;14590;14626;15225;15833;16001;16358;16613;17220;18170;18196;18917;18924;18936;19511;19513;20807;21097;21290;21347;21751;23793;24104;24105;24115;24879;25120;25122;25824;27639;28251;3…	True;True;True;True;False;True;True;True;True;True;True;True;True;True;True;True;True;True;True;False;False;True;True;True;False;True;True;True;True;True;True;True;True;True;True;True;True;True;True;False;False;True;True;True;True;True;True;False;True;True;False;True;True;True;False;True;True;True;True;False;True;True;True;True;True;True;False;False;False;True;True;True;True;True;True;True;True;T…	934;1193;1194;1624;1625;1626;2083;2120;2356;3177;3232;3582;3684;4583;5088;5510;6033;6410;6414;6415;6441;6894;6895;7538;8138;8321;8885;9007;9008;9174;9175;12594;12595;12774;13660;13661;13662;13843;13955;14436;14437;14451;15248;15249;15516;15525;15527;15819;16019;16060;16731;17380;17381;17562;17985;18276;18929;19963;19995;20794;20801;20802;20814;21437;21439;22870;23241;23242;23453;23513;23977;26189…	9600;9601;9602;9603;9604;9605;9606;9607;9608;9609;9610;9611;9612;9613;12231;12232;12233;12234;12235;12236;12237;12238;12239;12240;12241;12242;12243;12244;12245;12246;12247;12248;12249;12250;16498;16499;16500;16501;16502;16503;16504;16505;16506;16507;16508;16509;16510;16511;16512;16513;16514;16515;16516;16517;16518;16519;16520;16521;16522;16523;16524;16525;16526;16527;16528;16529;16530;21576;21577…	6714;6715;6716;6717;6718;6719;6720;6721;6722;8527;8528;8529;8530;8531;8532;8533;8534;8535;8536;8537;8538;8539;8540;8541;8542;8543;11519;11520;11521;11522;11523;11524;11525;11526;11527;11528;15064;15065;15066;15257;15258;15259;16898;16899;16900;16901;16902;16903;16904;16905;16906;16907;16908;23152;23153;23154;23155;23156;23157;23158;23159;23160;23161;23162;23163;23164;23165;23166;23533;23534;23535…	6715;8531;8543;11521;15064;15258;16904;23156;23541;26111;26734;33600;37219;40297;44091;47061;47118;47120;47321;50930;50949;55782;60576;62297;66630;67425;68718;92609;92616;94025;101037;102403;103177;106633;106659;106798;113164;115076;115116;115153;117478;119044;119432;125858;130890;132537;136078;139161;143871;152751;152967;160084;160137;160293;164959;164985;176326;178912;180520;181104;184848;20204…	4788;4789;4790;4791;4792;4793;4794;4795;4796;4797;4798;4799	223;941;1030;1748;1751;1837;1874;2168;2284;2567;2669;2670
P31001;P08553;P46660;D3YZ35;P08551	P31001	Desmin	Des	41	36	36	69.5	345730000000	42542000000	34409000000	43218000000	23264000000	17421000000	51388000000	31310000000	38271000000	15000000000	48905000000	39413000000	41529000000	38903000000	48089000000	52894000000	44022000000	52078000000	56382000000	57705000000	49952000000	712;2926;3236;3237;5700;6878;8568;8569;9772;10086;10087;11815;11973;11989;12867;17118;18387;18632;19711;20953;22892;25689;27043;27044;29049;29050;30997;32451;33988;35299;36121;36757;41097;43356;43357;43898;44076;44078;44743;46445;46527	True;True;True;True;True;True;True;True;True;True;True;False;True;True;True;True;False;True;True;True;True;False;True;True;True;True;True;False;True;True;True;True;True;True;True;True;False;True;True;True;True	789;3249;3576;3577;6255;7572;9395;9396;10714;11049;11050;11051;11052;11053;12944;13120;13137;14088;18823;20206;20484;21652;23075;25206;28245;29772;29773;31958;31959;31960;31961;34723;36341;38044;38045;39474;40352;41033;45805;48346;48347;48348;48947;49137;49139;49862;51772;51864	7888;7889;7890;7891;7892;33896;33897;33898;33899;33900;33901;33902;33903;33904;33905;33906;33907;33908;33909;33910;33911;33912;33913;33914;33915;33916;33917;33918;33919;33920;33921;33922;33923;33924;33925;37223;37224;37225;37226;37227;37228;37229;37230;37231;37232;37233;37234;37235;37236;37237;37238;37239;37240;37241;37242;37243;37244;37245;37246;37247;37248;37249;37250;37251;37252;37253;37254;37…	5569;5570;5571;5572;5573;23737;23738;23739;23740;23741;23742;23743;23744;23745;23746;23747;23748;23749;23750;23751;23752;23753;23754;23755;26029;26030;26031;26032;26033;26034;26035;26036;26037;26038;26039;26040;26041;26042;26043;26044;26045;26046;26047;26048;26049;26050;26051;26052;26053;26054;26055;26056;26057;45653;45654;45655;45656;45657;45658;45659;45660;45661;45662;45663;45664;45665;45666;45…	5569;23747;26029;26047;45659;56129;70340;70347;80151;82539;82556;95297;96485;96597;104103;143177;154724;157357;166598;177603;194639;216678;227652;227670;243808;243835;262054;274770;286937;296136;302588;307523;341139;361037;361043;365993;367301;367334;374042;387890;388476	2341;2342;2343;2344;2345;2346	158;262;264;321;345;395
P08122;D3YV27	P08122	Collagen alpha-2(IV) chain;Canstatin	Col4a2	65	65	64	61.5	342340000000	64312000000	50044000000	54552000000	30002000000	15893000000	41912000000	19715000000	20741000000	9671300000	35501000000	64854000000	59094000000	58940000000	49992000000	53232000000	37690000000	31856000000	30171000000	40260000000	35349000000	1604;3664;4816;5750;9103;9211;9212;13658;14364;14368;14378;14387;14398;14423;14485;14508;14510;14525;14602;14605;14621;14647;14776;14799;14800;14808;15037;15038;15042;15053;15305;15306;15563;15564;15592;15609;15720;15803;15927;15931;16431;16458;16653;16655;16656;16682;16926;17028;17168;17413;17518;18760;19239;22438;22557;28796;32688;35986;39019;40303;40484;44718;48896;49311;49377	True;True;True;True;True;True;True;True;True;True;True;True;True;True;True;True;True;True;True;True;True;True;True;True;True;True;True;True;True;True;True;True;True;True;True;True;True;True;True;True;True;True;True;True;True;True;True;True;True;True;True;True;True;True;True;True;True;True;True;True;True;True;True;True;True	1767;4043;5296;6312;9982;9983;10102;10103;10104;14987;14988;15764;15768;15781;15790;15801;15831;15900;15926;15928;15929;15930;15947;15948;16032;16036;16055;16081;16082;16236;16237;16262;16263;16264;16272;16530;16531;16535;16547;16818;16819;17091;17092;17126;17145;17263;17349;17483;17487;18068;18098;18099;18318;18320;18321;18352;18617;18618;18619;18731;18876;19140;19254;20619;20620;20621;21143;247…	18239;18240;18241;18242;18243;18244;18245;18246;18247;18248;18249;18250;18251;18252;18253;18254;18255;18256;18257;18258;18259;18260;18261;41808;41809;41810;41811;41812;41813;41814;41815;41816;41817;55287;55288;55289;55290;55291;55292;55293;55294;55295;55296;55297;55298;65555;65556;65557;65558;104385;104386;104387;104388;104389;104390;104391;104392;104393;104394;104395;104396;104397;104398;104399;…	12705;12706;12707;12708;12709;12710;12711;12712;12713;12714;12715;12716;12717;12718;12719;12720;12721;12722;12723;12724;29179;29180;29181;29182;29183;29184;29185;29186;29187;38741;38742;38743;38744;38745;38746;38747;38748;38749;38750;46170;46171;46172;74501;74502;74503;74504;74505;74506;74507;74508;74509;74510;74511;74512;74513;74514;74515;74516;74517;74518;75490;75491;75492;75493;75494;75495;754…	12719;29179;38749;46172;74514;75502;75503;110901;116792;116876;116957;117040;117131;117547;117912;118095;118108;118381;119171;119191;119382;119586;121236;121668;121672;121869;124206;124210;124228;124498;126510;126512;128586;128612;128870;129022;129972;130649;131549;131704;137022;137469;139421;139443;139444;139702;141738;142545;143512;145249;146569;158491;162949;191052;192074;241914;276780;301408;…	1822;1823;1824;1825;1826;1827;1828;1829;1830;1831;1832;1833;1834;1835;1836;1837;1838	207;210;296;397;732;877;922;928;981;1350;1453;1476;1498;1503;1539;1570;1571
O35887;G3V004;G3UWV3;G3UWR0;G3UXA8;G3UY49;G3UXA3	O35887;G3V004;G3UWV3;G3UWR0	Calumenin	Calu	20	20	4	64.8	340290000000	54260000000	61712000000	56471000000	22912000000	14443000000	35187000000	32054000000	19400000000	9931100000	33916000000	59464000000	62585000000	55508000000	43032000000	44724000000	39163000000	47638000000	30707000000	31976000000	38127000000	5712;6247;7273;7842;8647;8699;10670;10671;15339;18434;30226;37067;37762;41010;41011;44758;44789;47784;48273;48274	True;True;True;True;True;True;True;True;True;True;True;True;True;True;True;True;True;True;True;True	6268;6853;6854;7994;8604;9481;9482;9536;11721;11722;16854;20255;33872;33873;41363;42130;45710;45711;49877;49911;53220;53761;53762	65031;65032;65033;65034;65035;65036;65037;65038;65039;65040;65041;65042;65043;65044;65045;65046;65047;65048;71513;71514;71515;71516;71517;71518;71519;71520;71521;71522;71523;71524;71525;71526;71527;71528;71529;71530;71531;71532;71533;71534;71535;71536;71537;71538;71539;71540;71541;71542;71543;71544;71545;71546;71547;71548;71549;71550;71551;71552;71553;71554;71555;71556;71557;71558;71559;71560;715…	45772;45773;45774;45775;45776;45777;45778;45779;45780;45781;45782;45783;45784;45785;45786;45787;45788;50526;50527;50528;50529;50530;50531;50532;50533;50534;50535;50536;50537;50538;50539;50540;50541;50542;50543;50544;50545;50546;50547;50548;50549;50550;50551;50552;50553;50554;50555;50556;50557;50558;50559;50560;50561;50562;50563;50564;50565;50566;50567;50568;50569;50570;50571;50572;50573;50574;505…	45774;50567;59284;64327;71135;71495;87044;87048;126760;155118;255516;309800;314963;340190;340203;374152;374499;398768;402458;402512	1525;1526;1527	188;197;217
O88569;F6U106;O88569-2;O88569-3	O88569;F6U106;O88569-2;O88569-3	Heterogeneous nuclear ribonucleoproteins A2/B1	Hnrnpa2b1	25	25	24	70.3	333780000000	38149000000	42035000000	36375000000	23313000000	16562000000	46662000000	36376000000	34030000000	14285000000	45993000000	34121000000	40295000000	35101000000	41626000000	50640000000	41471000000	56279000000	43330000000	58567000000	46106000000	7886;8533;8534;8814;14946;14959;14963;14964;15184;15230;15267;19473;24362;24363;27948;27949;31369;32251;32570;33989;35949;38083;41774;48702;48703	True;True;True;True;True;True;True;True;True;True;True;True;True;True;True;True;True;True;True;True;True;True;True;True;True	8648;9359;9360;9668;16424;16440;16444;16445;16446;16447;16448;16687;16737;16777;21397;26809;26810;30745;30746;30747;30748;35131;35132;36126;36468;38046;40167;42485;46551;54226;54227	90608;90609;90610;90611;90612;90613;90614;90615;90616;90617;98067;98068;98069;98070;98071;98072;98073;98074;98075;98076;98077;98078;98079;98080;98081;98082;98083;98084;98085;98086;98087;98088;98089;98090;98091;98092;98093;98094;98095;98096;98097;98098;98099;98100;98101;98102;98103;98104;98105;98106;98107;98108;98109;98110;98111;98112;98113;98114;98115;98116;98117;98118;98119;98120;98121;98122;981…	64751;64752;64753;64754;64755;64756;64757;64758;64759;70011;70012;70013;70014;70015;70016;70017;70018;70019;70020;70021;70022;70023;70024;70025;70026;70027;70028;70029;70030;70031;70032;70033;70034;70035;70036;70037;70038;70039;70040;70041;70042;70043;70044;70045;70046;70047;70048;70049;70050;70051;70052;70053;70054;70055;70056;70057;72356;72357;72358;72359;72360;72361;123181;123182;123347;123348…	64751;70011;70050;72357;123182;123351;123393;123446;125607;125882;126158;164730;206178;206215;235125;235138;265140;273173;275789;286944;301087;317410;347472;405653;405696	1050;1051;1052;1053	53;72;79;327
Q8CG14;E9Q6C2;D3YUK7;E9Q493;F7CVN5;E0CZE7	Q8CG14;E9Q6C2;D3YUK7;E9Q493	Complement C1s-A subcomponent;Complement C1s-A subcomponent heavy chain;Complement C1s-A subcomponent light chain	C1sa;C1s	29	29	18	62.2	325390000000	53386000000	52942000000	51456000000	25590000000	14861000000	40933000000	27233000000	18825000000	6617200000	33550000000	52417000000	63441000000	55941000000	46486000000	46864000000	36586000000	39283000000	29900000000	24685000000	32669000000	3328;4463;4518;4750;8422;8775;14041;17254;19657;21502;21733;27336;27518;31676;32244;36974;39331;42114;42115;42147;42486;42799;43986;44310;44424;46227;46664;48023;48681	True;True;True;True;True;True;True;True;True;True;True;True;True;True;True;True;True;True;True;True;True;True;True;True;True;True;True;True;True	3672;4910;4970;5227;9233;9626;9627;15410;18967;21593;23681;23682;23683;23958;30090;30286;35498;36119;41260;43860;46954;46955;47006;47393;47394;47737;49038;49039;49396;49520;51544;52008;52009;53479;54204	38140;38141;38142;38143;38144;38145;38146;38147;38148;38149;38150;38151;38152;38153;38154;38155;38156;38157;38158;38159;38160;38161;38162;38163;38164;51288;51289;51998;51999;52000;52001;52002;52003;52004;52005;52006;52007;52008;52009;52010;52011;52012;52013;52014;52015;52016;52017;54632;54633;54634;54635;54636;54637;54638;54639;54640;54641;54642;54643;54644;54645;54646;54647;54648;54649;54650;546…	26611;26612;26613;26614;26615;26616;26617;26618;26619;26620;26621;26622;26623;26624;26625;26626;26627;26628;26629;26630;26631;26632;26633;26634;35949;36389;36390;36391;36392;36393;36394;36395;36396;36397;36398;36399;36400;36401;36402;36403;38273;38274;38275;38276;38277;38278;38279;38280;38281;38282;38283;38284;38285;38286;38287;38288;38289;69065;69066;69067;69068;69069;69070;69071;69072;69073;690…	26611;35949;36401;38283;69071;72085;114256;144113;166232;182469;184716;230058;231752;267750;273127;309023;326836;350599;350600;350878;353829;356208;366681;369944;371237;386351;389524;400426;405525	846;847;848;849;850;851	277;393;485;490;564;616
Q61576;A2A4H9;F6W360	Q61576;A2A4H9	Peptidyl-prolyl cis-trans isomerase FKBP10	Fkbp10	31	31	31	63.7	317000000000	59573000000	48460000000	53032000000	27119000000	17884000000	37288000000	19811000000	18953000000	7356200000	27518000000	55753000000	56462000000	52041000000	39698000000	46727000000	33828000000	27656000000	24102000000	24585000000	28435000000	711;3417;3751;5699;7585;7586;8436;11615;15293;15900;15977;15978;16095;17382;17586;20280;21098;21896;22409;24492;25401;26377;30118;34568;35614;36730;37411;40030;41607;41608;44878	True;True;True;True;True;True;True;True;True;True;True;True;True;True;True;True;True;True;True;True;True;True;True;True;True;True;True;True;True;True;True	788;3772;4138;4139;6254;8325;8326;9247;9248;12728;12729;16805;17452;17453;17454;17537;17538;17539;17661;17662;17663;19108;19324;22283;23243;24136;24686;26953;27939;29019;33713;33714;38673;39811;39812;41003;41744;44616;46367;46368;46369;46370;50008	7857;7858;7859;7860;7861;7862;7863;7864;7865;7866;7867;7868;7869;7870;7871;7872;7873;7874;7875;7876;7877;7878;7879;7880;7881;7882;7883;7884;7885;7886;7887;39210;39211;39212;39213;39214;39215;39216;39217;39218;39219;42763;42764;42765;42766;42767;42768;42769;42770;42771;64866;64867;64868;64869;64870;64871;64872;64873;64874;64875;64876;64877;64878;64879;64880;64881;87234;87235;87236;87237;87238;8723…	5552;5553;5554;5555;5556;5557;5558;5559;5560;5561;5562;5563;5564;5565;5566;5567;5568;27420;27421;27422;29828;29829;29830;29831;29832;45617;45618;45619;45620;45621;45622;45623;45624;45625;45626;45627;45628;45629;45630;45631;45632;45633;45634;45635;45636;45637;45638;45639;45640;45641;45642;45643;45644;45645;45646;45647;45648;45649;45650;45651;45652;62317;62318;62319;62320;62321;62322;62323;62324;62…	5568;27422;29832;45624;62339;62351;69158;93593;126441;131344;132342;132356;133450;145008;146980;171434;178947;186097;190881;207122;214542;221990;254578;291074;298316;307331;312411;331968;346194;346209;375245	3776;3777;3778;3779;3780;3781;3782;3783;3784;3785;3786	60;106;108;169;213;220;288;445;508;537;549
E9PWE8;Q62188;Q3TT92;D3YUS0;D3Z567	E9PWE8;Q62188;Q3TT92	Dihydropyrimidinase-related protein 3	Dpysl3	37	37	33	80.7	316660000000	39198000000	35803000000	39562000000	20655000000	12481000000	49406000000	30346000000	31741000000	11282000000	46189000000	34635000000	42820000000	43620000000	33491000000	33054000000	48574000000	40736000000	37172000000	35215000000	41841000000	33;207;1868;6748;6843;8820;10489;11560;12740;14224;16144;16154;16265;17368;17481;17482;19231;19825;20868;22055;29021;29148;29602;29985;30087;30875;31161;34031;34348;36049;36050;37124;37333;41491;41713;47931;48561	True;True;True;True;True;True;True;True;True;True;True;True;True;True;True;True;True;True;True;True;True;True;True;True;True;True;True;True;True;True;True;True;True;True;True;True;True	37;223;224;2070;7399;7533;9675;11525;12666;13950;15610;17739;17740;17756;17757;17883;19091;19092;19093;19215;19216;21134;21780;22949;22950;24312;24313;31911;31912;32119;32120;32856;32857;32858;33490;33491;33657;33658;33659;34584;34585;34896;38093;38440;40276;40277;41424;41656;46239;46486;53383;54072;54073	370;371;372;373;374;375;376;377;378;379;380;381;382;383;384;385;386;387;388;389;390;391;392;393;394;395;396;397;2324;2325;2326;2327;2328;2329;2330;2331;2332;2333;2334;2335;2336;2337;2338;2339;2340;2341;2342;2343;2344;2345;2346;2347;2348;2349;2350;2351;2352;2353;2354;2355;2356;2357;21376;21377;21378;21379;21380;21381;21382;21383;21384;21385;21386;21387;21388;21389;21390;21391;21392;21393;21394;213…	258;259;260;261;262;263;264;265;266;267;268;269;270;271;272;273;274;275;276;277;278;279;1674;1675;1676;1677;1678;1679;1680;1681;1682;1683;1684;1685;1686;1687;1688;1689;1690;1691;1692;1693;1694;1695;1696;14906;14907;14908;14909;14910;14911;14912;14913;14914;14915;14916;14917;14918;14919;14920;14921;14922;14923;54946;54947;54948;54949;54950;54951;54952;54953;54954;54955;55743;55744;55745;55746;5574…	267;1695;14906;54953;55757;72455;85884;93064;103095;115765;133982;134100;134994;144895;146333;146334;162894;167518;176852;187740;243522;244857;249322;253108;254080;260830;263220;287225;289591;301898;301899;310143;311749;345230;347034;399766;404672	572;573;574;575;576;577;578;579;580;581;582;583;584;585;586;587	37;150;177;191;196;216;278;281;325;328;475;488;550;566;601;611
P19324	P19324	Serpin H1	Serpinh1	25	25	25	66.4	316620000000	49810000000	45231000000	46269000000	21938000000	12120000000	42632000000	21498000000	26164000000	9603800000	41353000000	47711000000	50552000000	49774000000	38983000000	31762000000	39470000000	29690000000	32374000000	27485000000	40739000000	3760;3966;5361;6740;6741;6904;7075;7647;17448;18246;22727;24546;27201;27371;27814;28875;36795;36796;37236;37237;39976;40479;40784;40785;41292	True;True;True;True;True;True;True;True;True;True;True;True;True;True;True;True;True;True;True;True;True;True;True;True;True	4148;4374;5883;7391;7392;7601;7787;8392;19177;20053;25031;27011;29947;29948;29949;30128;30602;30603;31750;41072;41073;41546;41547;44556;44557;45115;45116;45117;45455;45456;45457;45458;46016	42894;42895;42896;42897;42898;42899;42900;42901;42902;42903;42904;46114;46115;46116;61332;61333;61334;61335;61336;61337;61338;77457;77458;77459;77460;77461;77462;77463;77464;79380;79381;79382;79383;79384;79385;79386;79387;79388;79389;79390;79391;79392;79393;79394;79395;79396;79397;79398;79399;79400;79401;81069;81070;81071;81072;81073;81074;81075;81076;81077;81078;81079;81080;81081;81082;81083;810…	29922;29923;29924;29925;29926;29927;29928;29929;29930;29931;32413;43061;54924;54925;54926;54927;56338;56339;56340;56341;56342;56343;56344;56345;56346;56347;56348;56349;56350;57538;57539;57540;57541;57542;57543;57544;57545;57546;57547;57548;57549;57550;57551;57552;57553;57554;57555;57556;57557;57558;57559;57560;57561;57562;57563;57564;57565;57566;57567;57568;57569;62800;62801;62802;62803;146022;14…	29926;32413;43061;54924;54925;56350;57558;62802;146024;153498;193315;207700;228923;230311;234184;242320;307752;307766;311141;311166;331609;335676;338342;338368;342988	2144;2145;2146;2147;2148;2149;2150	57;203;235;236;254;257;270
P01027;P01027-2	P01027	Complement C3;Complement C3 beta chain;Complement C3 alpha chain;C3a anaphylatoxin;Acylation stimulating protein;Complement C3b alpha chain;Complement C3c alpha chain fragment 1;Complement C3dg fragment;Complement C3g fragment;Complement C3d fragment;Complement C3f fragment;Complement C3c alpha chain fragment 2	C3	100	100	89	72.2	314670000000	25930000000	23988000000	24922000000	11476000000	8199200000	75882000000	42637000000	37371000000	11337000000	52927000000	25051000000	28066000000	26418000000	23659000000	26256000000	66986000000	58247000000	56210000000	54301000000	51207000000	407;408;475;621;1102;1214;1295;1296;3945;4282;5495;5983;6007;6123;6387;6598;6860;7306;7365;7366;7588;8033;10527;11659;11844;15461;17113;17284;17285;17672;19609;19877;20041;20300;21570;21583;22166;23456;23942;24164;24862;25408;26270;26947;27671;28308;29293;31728;31921;31925;31985;31986;32175;32331;32588;33185;34344;34437;34786;34881;35373;35670;36687;36761;37641;38049;38123;38200;38201;39879;40281…	True;True;True;True;True;True;True;True;True;True;True;True;True;True;True;True;True;True;True;True;True;True;True;True;True;True;True;True;True;True;True;True;True;True;True;True;True;True;True;True;True;True;True;True;True;True;True;True;True;True;True;True;True;True;True;True;True;True;True;True;True;True;True;True;True;True;True;True;True;True;True;True;True;True;True;True;True;True;True;True…	444;445;517;683;1211;1332;1423;1424;1425;4353;4713;4714;6026;6569;6593;6717;6718;7004;7233;7234;7551;8029;8089;8090;8328;8811;11566;12779;12979;16983;18817;18998;18999;19418;21544;21835;22018;22304;22305;23757;23772;24434;25828;26351;26597;27355;27947;28862;29666;30456;31144;32344;32345;35551;35754;35759;35760;35825;35826;36040;36041;36213;36214;36215;36486;37168;38436;38536;38537;38922;39023;395…	4358;4359;4360;4361;4362;4363;4364;4365;4366;4367;4368;4369;4370;4371;4372;4373;4374;4375;4376;4377;4378;4379;5138;5139;5140;5141;5142;5143;5144;5145;5146;5147;6749;6750;6751;6752;12419;12420;12421;12422;12423;12424;12425;12426;12427;12428;12429;12430;12431;12432;12433;12434;12435;12436;12437;12438;13610;13611;13612;13613;13614;13615;13616;13617;13618;13619;13620;13621;13622;13623;13624;14514;145…	3074;3075;3076;3077;3078;3079;3080;3081;3082;3083;3084;3085;3086;3087;3088;3662;3663;3664;3665;3666;3667;3668;3669;3670;3671;3672;4826;4827;8645;8646;8647;8648;8649;8650;8651;8652;8653;8654;8655;8656;8657;8658;8659;8660;8661;9511;9512;9513;9514;9515;9516;9517;9518;9519;10173;10174;10175;10176;10177;10178;31616;31617;31618;31619;31620;31621;31622;31623;31624;31625;34577;34578;34579;34580;34581;345…	3076;3088;3672;4826;8647;9512;10173;10176;31619;34579;44071;48468;48642;49567;51829;53386;55864;59521;59859;59862;62358;65905;86152;94048;95471;127783;143143;144320;144327;147831;165785;167863;169233;171595;183041;183238;188674;199050;203174;204832;210192;214629;220896;227049;233206;237832;246207;268085;269988;270029;270401;270402;272432;273689;275887;280829;289573;290228;292749;293291;296709;298…	1680;1681;1682;1683;1684;1685;1686;1687;1688;1689;1690;1691;1692;1693;1694;1695;1696;1697;1698;1699;1700	202;309;369;374;441;449;463;639;675;791;826;875;990;1129;1181;1274;1294;1384;1520;1563;1604
P07901;B7ZC50;A2A6A2;B7ZC49	P07901	Heat shock protein HSP 90-alpha	Hsp90aa1	39	28	28	55.4	313660000000	37051000000	31892000000	38703000000	23392000000	10943000000	53666000000	30374000000	33904000000	9512900000	44226000000	38679000000	37027000000	40871000000	37423000000	38593000000	45836000000	40024000000	46183000000	43769000000	38636000000	646;2255;2809;2810;4565;6713;6915;7169;8518;8519;9170;9895;9928;10290;10968;10969;13980;17447;17968;18035;18233;18289;18479;18754;21470;24724;24725;28687;31510;32869;35579;35580;36975;38982;41658;41664;44311;48735;49699	False;True;True;True;True;True;True;True;False;False;False;True;True;False;True;True;True;False;False;True;True;True;False;True;False;True;True;True;True;True;True;True;True;True;True;False;True;False;True	716;2482;3123;3124;5020;7359;7613;7614;7615;7887;9344;9345;10054;10844;10879;11293;11294;12036;12037;15345;19176;19746;19820;19821;20039;20100;20315;20613;23644;27205;27206;31552;31553;35314;36804;39775;39776;41261;41262;43452;46425;46431;49397;49398;54260;55314;55315	7236;7237;7238;7239;7240;7241;7242;7243;7244;7245;7246;7247;7248;7249;7250;7251;7252;7253;7254;7255;7256;7257;7258;7259;7260;7261;7262;7263;7264;25404;25405;25406;25407;25408;25409;25410;25411;25412;25413;25414;25415;32285;32286;32287;32288;32289;32290;32291;32292;32293;32294;32295;32296;32297;32298;32299;32300;32301;32302;32303;32304;32305;32306;32307;32308;32309;32310;32311;32312;32313;32314;32…	5129;5130;5131;5132;5133;5134;5135;5136;5137;5138;5139;5140;5141;5142;5143;5144;5145;5146;5147;5148;5149;5150;5151;5152;5153;5154;5155;5156;5157;5158;5159;5160;17796;17797;17798;17799;17800;17801;17802;17803;17804;17805;17806;17807;22557;22558;22559;22560;22561;22562;22563;22564;22565;22566;22567;22568;22569;22570;22571;22572;22573;22574;22575;22576;22577;22578;22579;22580;22581;22582;22583;22584…	5132;17801;22560;22569;36805;54364;56405;58510;69886;69896;75043;81122;81337;84217;88973;88974;113878;145993;150777;151429;153361;153940;155558;158381;182245;209273;209281;241194;266462;278074;298072;298109;309038;324370;346652;346687;369972;406305;414026	1784;1785;1786;1787;1788;1789;1790	372;403;475;522;611;626;629
Q6GU68	Q6GU68	Immunoglobulin superfamily containing leucine-rich repeat protein	Islr	13	13	13	57	311840000000	51722000000	42666000000	48827000000	26033000000	17363000000	40963000000	20553000000	18955000000	8672500000	36087000000	54992000000	54889000000	50664000000	55407000000	57851000000	38239000000	30072000000	28971000000	26449000000	31308000000	2342;5009;11601;14361;23927;24961;26752;29201;38577;38899;40115;43142;48552	True;True;True;True;True;True;True;True;True;True;True;True;True	2578;5504;12713;15761;26334;27460;29452;32203;32204;43018;43365;44712;48121;54063	26684;26685;26686;26687;26688;26689;26690;26691;26692;26693;26694;26695;26696;26697;26698;26699;26700;26701;26702;26703;26704;26705;57434;57435;57436;57437;57438;57439;57440;57441;57442;57443;57444;57445;57446;57447;57448;57449;57450;57451;57452;131885;131886;131887;131888;131889;131890;131891;131892;131893;131894;131895;131896;131897;131898;131899;131900;131901;131902;131903;131904;131905;131906…	18704;18705;18706;18707;18708;18709;18710;18711;18712;18713;18714;18715;18716;18717;18718;18719;18720;18721;18722;18723;18724;18725;18726;18727;18728;40221;40222;40223;40224;40225;40226;40227;40228;40229;40230;40231;40232;40233;40234;40235;40236;40237;40238;40239;93382;93383;93384;93385;93386;93387;93388;93389;93390;93391;93392;93393;93394;93395;93396;93397;93398;93399;93400;93401;93402;93403;934…	18721;40222;93405;116779;203021;210925;225493;245394;321307;323757;332645;359295;404569	3997	129
E9PZF0;Q01768	E9PZF0;Q01768	Nucleoside diphosphate kinase;Nucleoside diphosphate kinase B	Gm20390;Nme2	15	15	5	69.3	308890000000	49453000000	34323000000	40437000000	17078000000	7376600000	47117000000	27785000000	29741000000	10948000000	44634000000	46222000000	40602000000	45665000000	29343000000	25118000000	44392000000	32004000000	44298000000	48590000000	46420000000	3295;7255;9387;9481;9482;12997;14396;16054;16055;30940;37329;41111;45786;45787;49056	True;True;True;True;True;True;True;True;True;True;True;True;True;True;True	3639;7974;10299;10398;10399;14230;15799;17618;17619;34657;41652;45819;51022;51023;51024;51025;54612;54613;54614	37874;37875;37876;37877;83244;83245;83246;83247;83248;83249;83250;83251;83252;83253;83254;83255;83256;83257;83258;83259;83260;83261;83262;108133;108134;108135;108136;108137;108138;108139;108140;108141;109043;109044;109045;109046;109047;109048;109049;109050;109051;109052;109053;109054;109055;109056;109057;109058;109059;109060;109061;109062;109063;109064;109065;109066;109067;109068;109069;109070;10…	26439;26440;59144;59145;59146;59147;59148;59149;59150;59151;59152;59153;59154;59155;59156;59157;59158;59159;77076;77077;77078;77731;77732;77733;77734;77735;77736;77737;77738;77739;77740;77741;77742;77743;77744;77745;77746;77747;77748;77749;77750;77751;77752;77753;77754;77755;77756;77757;77758;77759;77760;77761;77762;77763;77764;77765;77766;77767;77768;77769;77770;77771;77772;77773;77774;77775;777…	26439;59146;77078;77733;77766;105150;117117;133113;133117;261425;311710;341264;382552;382590;408868	695;696;697	68;76;90
Q3UQ28;D3Z5M7	Q3UQ28	Peroxidasin homolog	Pxdn	74	74	59	63.1	306280000000	54818000000	43561000000	47162000000	26576000000	16787000000	40146000000	19957000000	17802000000	6524500000	32951000000	54762000000	47662000000	49394000000	52695000000	51254000000	37349000000	31342000000	29345000000	30408000000	35718000000	831;1076;1280;2670;4136;4637;5418;5898;5936;6946;9026;9576;10698;12488;12619;12620;14527;15279;15388;15698;15781;16602;16723;17550;18427;19024;20381;20584;21134;21163;21414;21559;21870;21994;22056;22520;23571;23765;24384;24488;24856;26517;26550;26551;27849;28814;28881;29915;30717;30800;32465;32995;32996;34382;35463;38608;38609;38857;39325;39821;40118;41388;41419;42308;43173;43174;43346;44012;4635…	True;True;True;True;True;True;True;True;True;True;True;True;True;True;True;True;True;True;True;True;True;True;True;True;True;True;True;True;True;True;True;True;True;True;True;True;True;True;True;True;True;True;True;True;True;True;True;True;True;True;True;True;True;True;True;True;True;True;True;True;True;True;True;True;True;True;True;True;True;True;True;True;True;True	914;1185;1405;2973;2974;4557;5098;5941;6475;6518;7650;9896;9897;10504;11749;13677;13822;13823;15950;16790;16907;17240;17327;18261;18398;19286;20247;20911;22392;22616;22617;23283;23315;23584;23745;24107;24246;24314;24807;25950;26161;26833;26948;26949;27347;27348;29189;29235;29236;30638;31686;31756;31757;33379;33380;34411;34499;36355;36941;36942;36943;36944;38477;39649;39650;43050;43051;43319;43854…	9265;9266;9267;9268;9269;9270;9271;9272;9273;9274;9275;9276;9277;9278;9279;9280;9281;9282;12137;12138;12139;12140;12141;12142;12143;12144;14316;14317;14318;14319;30894;30895;30896;30897;30898;30899;30900;30901;30902;30903;30904;30905;30906;30907;30908;30909;30910;30911;30912;30913;30914;30915;30916;30917;30918;30919;30920;30921;30922;30923;47723;47724;47725;47726;47727;47728;47729;47730;47731;477…	6454;6455;6456;6457;6458;6459;6460;6461;6462;6463;6464;6465;6466;6467;6468;6469;6470;8451;8452;8453;8454;8455;8456;8457;8458;8459;10041;10042;21588;21589;21590;21591;21592;21593;21594;21595;21596;21597;21598;21599;21600;21601;21602;21603;21604;21605;21606;21607;21608;33451;33452;33453;33454;33455;33456;33457;33458;37273;37274;37275;37276;37277;37278;37279;43469;43470;47626;47627;47628;47629;47630…	6465;8458;10042;21598;33456;37274;43469;47627;47971;56631;73859;78617;87192;101158;102215;102226;118404;126351;127203;129833;130475;139043;140022;146739;155072;161445;172416;174330;179196;179438;181717;183006;185830;187206;187770;191827;200303;201851;206379;207114;210151;223124;224069;224083;234382;241996;242365;252513;259237;260026;274822;279186;279207;289854;297220;321516;321520;323452;326787;3…	1167;1168;1169;3523;3524;3525;3526;3527;3528;3529;3530;3531;3532;3533;3534;3535	47;300;315;531;752;791;886;891;957;984;1041;1125;1143;1215;1230;1388
P58774	P58774	Tropomyosin beta chain	Tpm2	31	16	5	68	302720000000	36627000000	20436000000	36321000000	16683000000	17760000000	42602000000	35139000000	30594000000	13963000000	52593000000	29636000000	27620000000	31718000000	26342000000	32432000000	30919000000	45807000000	41824000000	41138000000	40922000000	78;948;949;991;1840;3545;3546;4430;8067;8467;17044;18145;18146;18147;21314;21315;22116;22320;22321;22933;23339;28459;28460;28461;29298;34497;36170;36171;37583;38593;41475	False;False;False;True;True;False;False;True;False;False;True;True;True;True;False;False;True;False;False;False;False;True;True;True;True;True;False;False;True;True;True	84;1045;1046;1090;2036;3914;3915;4875;8849;9283;18747;19938;19939;19940;23479;23480;24381;24593;24594;25248;25704;31301;31302;31303;32351;32352;32353;38598;40404;40405;41937;43035;46221	825;826;10783;10784;10785;10786;10787;10788;11190;11191;11192;11193;11194;20952;20953;20954;20955;20956;20957;20958;20959;20960;20961;20962;20963;20964;20965;20966;40639;40640;40641;40642;40643;40644;40645;40646;40647;40648;40649;40650;40651;40652;40653;40654;40655;40656;40657;40658;40659;40660;40661;40662;40663;40664;40665;40666;40667;40668;40669;40670;40671;40672;40673;40674;40675;40676;40677;4…	610;611;612;613;7535;7536;7537;7804;14620;14621;14622;14623;14624;14625;14626;28364;28365;28366;28367;28368;28369;28370;28371;28372;28373;28374;28375;28376;28377;28378;28379;28380;28381;28382;28383;28384;28385;28386;28387;28388;28389;28390;28391;28392;28393;28394;28395;28396;28397;28398;28399;28400;28401;28402;28403;28404;28405;28406;28407;28408;28409;28410;28411;28412;28413;35704;35705;35706;357…	611;7536;7537;7804;14622;28374;28385;35704;66207;69442;142672;152549;152554;152563;180766;180832;188273;190169;190199;194938;198304;238978;239028;239060;246431;290590;302965;302973;313875;321408;345065	2696;2697	141;146
P26039;F8WGT0;A2AIM2;F6SX70;F6S1V7	P26039;F8WGT0	Talin-1	Tln1	110	110	98	65.4	302550000000	41535000000	32178000000	37433000000	20751000000	13649000000	45004000000	25840000000	27201000000	10761000000	48194000000	41961000000	39600000000	41962000000	40108000000	40442000000	43142000000	38655000000	40058000000	42111000000	45072000000	31;280;379;473;542;755;1237;1307;1537;1648;1668;1988;2008;2047;2050;2051;2142;2443;2722;2827;2990;3255;3459;3494;3746;3768;3815;3822;4074;5269;5931;6337;7051;7982;8024;8340;9159;9953;10679;10869;11394;11521;12417;12418;12542;12991;12992;14049;15644;15680;16942;17056;17142;17213;17286;18701;18841;19989;20452;21050;21575;22592;23248;24554;25086;25466;25479;25783;26435;26954;27383;30055;30075;30076;…	True;True;True;True;True;True;True;True;True;True;True;True;True;True;True;True;True;True;True;True;True;True;True;True;True;True;True;True;True;True;True;True;True;True;True;True;True;True;True;True;True;True;True;True;True;True;True;True;True;True;True;True;True;True;True;True;True;True;True;True;True;True;True;True;True;True;True;True;True;True;True;True;True;True;True;True;True;True;True;True…	35;304;305;414;515;594;833;1357;1436;1694;1818;1838;1839;2197;2218;2261;2262;2265;2266;2362;2689;3031;3032;3144;3314;3315;3597;3818;3856;3857;4133;4157;4212;4220;4490;4491;5787;6511;6512;6949;7760;8751;8799;9144;10042;10043;10904;10905;11730;11931;12487;12625;13600;13601;13738;14224;14225;15418;17183;17221;18636;18759;18849;18921;19000;20556;20710;21958;22472;23186;23764;24883;25606;27020;27596;2…	332;333;334;335;336;337;338;339;340;341;342;343;344;345;346;347;348;349;3028;3029;3030;3031;3032;3033;4055;4056;4057;4058;4059;4060;4061;4062;4063;4064;4065;4066;4067;4068;4069;4070;4071;4072;4073;4074;4075;4076;4077;5119;5120;5121;5122;5123;5124;5125;5126;5127;5128;5129;5130;5131;5132;5133;5134;5951;5952;8429;8430;8431;8432;8433;13896;13897;13898;13899;13900;13901;13902;13903;13904;14593;14594;1…	226;227;228;229;230;231;232;233;234;235;236;237;238;2136;2137;2138;2858;2859;2860;2861;2862;2863;2864;2865;2866;2867;2868;2869;2870;2871;2872;2873;2874;2875;3649;3650;3651;3652;3653;3654;3655;3656;3657;3658;4263;5914;9741;9742;9743;9744;9745;10220;10221;10222;10223;10224;10225;10226;10227;12121;12122;12123;13109;13110;13111;13112;13264;13265;13266;13267;13268;13269;13270;13271;13272;13273;13274;1…	227;2138;2869;3654;4263;5914;9744;10227;12121;13112;13270;15756;15961;16188;16220;16227;16955;19611;21988;22675;24172;26233;27662;27959;29808;30030;30445;30529;33020;42380;47928;51360;57364;65491;65785;68527;74969;81460;87107;88356;91943;92788;100293;100299;101525;105118;105123;114302;129358;129600;141844;142769;143323;143798;144334;157980;159325;168806;173246;178465;183194;192339;197604;207792;2…	552;1138;1139;1140;1141;1142;1143;1144;1145;1146;1147;1148;1149;1150;1151;1152;1153;1154;1155;1156;1157;1158;1159;1160;1161;1162;1163;1164;1165	17;72;111;113;419;453;468;480;669;816;822;1018;1050;1084;1352;1387;1407;1476;1596;1606;1702;1734;1759;1871;2121;2290;2399;2494;2508
G3X9T8;G3X8Q5;Q61147;E9PZD8;G3UXG1;G3UWP5;G3UZ53	G3X9T8;G3X8Q5;Q61147;E9PZD8	Ceruloplasmin	Cp	56	56	52	66.7	298440000000	46699000000	47387000000	46053000000	24526000000	14430000000	38734000000	23911000000	18963000000	7261500000	30472000000	45564000000	53944000000	46771000000	44006000000	46645000000	35491000000	34266000000	26605000000	27580000000	29684000000	764;1387;2555;5190;5467;6003;6056;6749;6750;6837;7475;8523;8640;9035;10269;11217;11832;11833;16307;16612;16886;17061;18980;22235;22273;22611;25390;29371;29410;29411;30189;30202;30901;31355;32234;32405;33629;34061;34110;35057;35509;35717;36766;37928;38978;39830;41022;41062;41482;43242;43254;43259;44284;45511;48070;49514	True;True;True;True;True;True;True;True;True;True;True;True;True;True;True;True;True;True;True;True;True;True;True;True;True;True;True;True;True;True;True;True;True;True;True;True;True;True;True;True;True;True;True;True;True;True;True;True;True;True;True;True;True;True;True;True	842;1529;2811;5700;5993;5994;5995;6589;6645;6646;7400;7401;7526;8210;9349;9473;9906;11263;11264;12300;12964;12965;17930;18274;18275;18572;18764;18765;20864;24505;24546;24903;27927;32467;32468;32469;32533;32534;32535;32536;33830;33831;33832;33847;33848;34613;35110;35111;36105;36293;37651;38124;38179;39211;39699;39921;41042;42311;43446;43447;44401;45722;45765;46228;48227;48239;48245;49370;50702;535…	8535;8536;8537;8538;8539;8540;8541;8542;8543;8544;8545;8546;8547;8548;8549;8550;8551;8552;8553;8554;8555;8556;8557;8558;8559;8560;15516;15517;15518;15519;15520;15521;15522;15523;15524;15525;15526;15527;15528;15529;15530;15531;29207;29208;29209;29210;29211;29212;29213;29214;29215;29216;29217;29218;29219;29220;59475;59476;59477;59478;59479;62407;62408;62409;62410;62411;62412;62413;62414;62415;62416…	5970;5971;5972;5973;5974;5975;5976;5977;5978;5979;5980;5981;5982;5983;5984;5985;5986;10843;10844;10845;10846;10847;10848;10849;10850;10851;10852;10853;10854;10855;10856;10857;10858;10859;20471;20472;20473;20474;20475;20476;20477;20478;20479;20480;20481;20482;41716;41717;41718;43797;43798;43799;43800;43801;43802;43803;43804;43805;43806;43807;43808;43809;48589;48590;48591;48592;48593;48594;48595;48…	5985;10849;20473;41716;43805;48589;49108;54966;54976;55691;61208;69934;71035;73899;84108;90770;95381;95388;135582;139134;141309;142802;161063;189437;189774;192474;214470;247102;247388;247409;255271;255332;261028;265004;272903;274447;284501;287554;287959;294413;297513;299089;307604;316216;324275;330695;340280;340706;345169;360187;360259;360286;369766;380415;400665;412711	357;359;1268;1269;1270;1271;1272;1273;1274;1275;1276;1277;1278;1279;1280	258;274;287;477;519;532;551;593;681;703;821;959;968;979;981
P49312;Q5EBP8;P49312-2	P49312;Q5EBP8;P49312-2	Heterogeneous nuclear ribonucleoprotein A1	Hnrnpa1	20	19	16	58.4	294900000000	39584000000	28996000000	38116000000	20140000000	13484000000	42803000000	34263000000	25968000000	9372800000	42172000000	37879000000	32875000000	39388000000	32985000000	38354000000	37709000000	43583000000	31601000000	34080000000	38490000000	7888;8528;8533;8535;10503;14893;14965;14966;15179;15231;19745;24361;31647;32569;35942;38198;38199;39735;48708;48709	True;True;False;True;True;True;True;True;True;True;True;True;True;True;True;True;True;True;True;True	8650;9354;9359;9361;11540;16368;16449;16450;16451;16452;16682;16738;21690;21691;26808;35466;36467;40159;42608;42609;42610;42611;44296;54233;54234	90623;90624;90625;90626;90627;90628;90629;90630;90631;90632;90633;90634;97988;97989;97990;97991;97992;97993;97994;97995;97996;97997;97998;97999;98000;98001;98002;98003;98004;98005;98006;98007;98008;98009;98010;98011;98012;98013;98014;98015;98016;98017;98018;98067;98068;98069;98070;98071;98072;98073;98074;98075;98076;98077;98078;98079;98080;98081;98082;98083;98084;98085;98086;98087;98088;98124;981…	64761;64762;64763;64764;64765;64766;64767;64768;64769;64770;64771;69960;69961;69962;69963;69964;69965;69966;69967;69968;69969;69970;69971;69972;69973;69974;69975;69976;69977;69978;69979;69980;70011;70012;70013;70014;70015;70016;70017;70018;70019;70020;70021;70022;70023;70024;70025;70026;70027;70058;70059;70060;70061;70062;70063;70064;70065;70066;70067;70068;70069;70070;85972;85973;85974;85975;859…	64765;69962;70011;70067;85973;122736;123509;123587;125565;125883;166998;206171;267497;275785;300954;318324;318358;329909;405806;405831	2520;2521;2522	46;72;137
P10605	P10605	Cathepsin B;Cathepsin B light chain;Cathepsin B heavy chain	Ctsb	16	16	16	65.5	292360000000	48768000000	44616000000	41877000000	20070000000	11226000000	38990000000	23287000000	20148000000	8552700000	34821000000	45405000000	56703000000	44142000000	35388000000	33682000000	36438000000	28496000000	32394000000	26637000000	30373000000	7104;9537;10806;14762;17828;17933;20748;23452;30689;30795;33306;37342;40707;40841;43375;45966	True;True;True;True;True;True;True;True;True;True;True;True;True;True;True;True	7817;10457;10458;11866;16221;19590;19591;19592;19708;22807;25824;34381;34494;37296;41666;45375;45521;48366;51252	81501;81502;81503;81504;81505;81506;81507;81508;81509;81510;81511;81512;81513;81514;81515;81516;81517;81518;81519;81520;81521;81522;81523;81524;81525;81526;81527;81528;81529;109658;109659;109660;109661;109662;109663;109664;109665;109666;109667;109668;109669;109670;109671;109672;109673;109674;109675;109676;109677;109678;109679;109680;109681;109682;109683;109684;109685;109686;109687;109688;123627;1…	57861;57862;57863;57864;57865;57866;57867;57868;57869;57870;57871;57872;57873;57874;57875;57876;57877;57878;57879;78145;78146;78147;78148;78149;78150;78151;78152;78153;78154;78155;78156;78157;78158;87905;87906;87907;87908;87909;87910;87911;87912;87913;87914;87915;87916;87917;87918;87919;87920;87921;121065;121066;121067;121068;121069;121070;121071;121072;121073;121074;121075;121076;121077;121078;1…	57862;78150;87917;121072;149355;150414;175857;199029;259037;260010;281683;311846;337729;338815;361163;384219	1895;1896;1897	240;274;275
Q9WVA4	Q9WVA4	Transgelin-2	Tagln2	20	20	17	87.9	290360000000	47643000000	33706000000	35309000000	20817000000	15811000000	34780000000	28083000000	26982000000	12214000000	35013000000	44103000000	36669000000	36955000000	33880000000	37122000000	33001000000	37178000000	34085000000	33576000000	33693000000	2726;5254;5255;8546;8547;10427;14251;16535;21219;22525;25319;25320;30670;31349;32038;34751;35438;41904;41905;48576	True;True;True;True;True;True;True;True;True;True;True;True;True;True;True;True;True;True;True;True	3036;5770;5771;9373;9374;11457;15639;15640;15641;18190;23373;23374;24812;27848;27849;34360;35102;35890;35891;38872;38873;39622;46692;46693;46694;54088	31531;31532;31533;31534;31535;31536;31537;31538;31539;31540;60257;60258;60259;60260;60261;60262;60263;60264;60265;60266;60267;60268;60269;60270;60271;60272;60273;60274;60275;60276;60277;60278;60279;60280;60281;60282;60283;60284;98276;98277;98278;98279;98280;98281;98282;98283;98284;98285;98286;98287;98288;98289;98290;98291;98292;98293;98294;98295;98296;98297;98298;98299;98300;98301;98302;98303;983…	22006;22007;22008;42277;42278;42279;42280;42281;42282;42283;42284;42285;42286;42287;42288;42289;42290;42291;42292;42293;42294;42295;42296;42297;42298;42299;42300;42301;42302;42303;70168;70169;70170;70171;70172;70173;70174;70175;70176;70177;70178;70179;70180;70181;70182;70183;70184;70185;70186;70187;70188;70189;70190;70191;85310;115876;115877;115878;115879;115880;115881;115882;115883;115884;115885…	22008;42284;42300;70168;70191;85310;115897;138361;179969;191843;213907;213913;258846;264945;270924;292410;297069;348524;348556;404823	5718;5719;5773;5774;5775;5776;5777	85;90;122;130;178;189;194
P62983	P62983	Ubiquitin-40S ribosomal protein S27a;Ubiquitin;40S ribosomal protein S27a	Rps27a	7	7	2	51.9	289620000000	42140000000	33959000000	31888000000	22067000000	20886000000	26732000000	29378000000	25728000000	15952000000	40892000000	38209000000	36627000000	35044000000	53053000000	54710000000	33743000000	40587000000	38316000000	61172000000	39866000000	4318;8368;9154;11129;34492;41626;41985	True;True;True;True;True;True;True	4753;9176;10037;12205;38593;46391;46783	49729;49730;49731;49732;49733;49734;49735;49736;49737;49738;49739;49740;49741;49742;49743;49744;49745;49746;49747;49748;96184;96185;96186;96187;96188;96189;96190;104954;104955;104956;104957;104958;104959;104960;104961;104962;126963;126964;126965;126966;126967;126968;126969;126970;126971;126972;126973;126974;126975;126976;126977;126978;126979;126980;126981;126982;126983;126984;126985;126986;126987…	34848;34849;34850;34851;34852;34853;34854;34855;34856;34857;68723;68724;68725;68726;68727;68728;74930;74931;74932;74933;74934;74935;74936;74937;74938;74939;74940;74941;90001;90002;90003;90004;90005;90006;90007;90008;90009;90010;90011;90012;90013;90014;90015;90016;90017;90018;90019;90020;90021;90022;90023;90024;90025;90026;90027;90028;90029;90030;90031;90032;90033;90034;90035;90036;90037;90038;900…	34857;68724;74935;90010;290561;346424;349168
P14211	P14211	Calreticulin	Calr	22	22	22	72.8	288210000000	46576000000	43300000000	43850000000	20213000000	12260000000	38836000000	23586000000	18522000000	7630500000	33436000000	52692000000	54622000000	51012000000	35582000000	32940000000	42315000000	32792000000	22580000000	28812000000	31479000000	5234;6776;6947;8598;10665;12286;13881;13959;13993;15991;16685;17203;17894;19356;19422;19423;20419;22692;24441;25444;38143;44823	True;True;True;True;True;True;True;True;True;True;True;True;True;True;True;True;True;True;True;True;True;True	5749;7437;7438;7439;7651;9426;11716;13459;15232;15322;15360;17552;18356;18911;19667;21272;21344;21345;22433;24995;26899;27988;42551;49949	60072;60073;60074;60075;60076;60077;60078;60079;60080;60081;60082;60083;60084;60085;60086;60087;60088;60089;60090;60091;60092;60093;60094;60095;60096;60097;60098;60099;60100;60101;60102;60103;60104;60105;60106;60107;60108;60109;77822;77823;77824;77825;77826;77827;77828;77829;77830;77831;77832;77833;77834;77835;77836;77837;77838;77839;77840;77841;77842;77843;77844;77845;77846;77847;77848;77849;778…	42151;42152;42153;42154;42155;42156;42157;42158;42159;42160;42161;42162;42163;42164;42165;42166;42167;42168;42169;42170;42171;42172;42173;42174;42175;42176;42177;42178;42179;42180;42181;55174;55175;55176;55177;55178;55179;55180;55181;55182;55183;55184;55185;55186;55187;55188;55189;55190;55191;55192;55193;55194;55195;55196;55197;55198;55199;55200;55201;55202;55203;55204;55205;55206;55207;55208;552…	42165;55215;56635;70616;86994;99168;112991;113663;113993;132485;139750;143728;150065;163854;164374;164392;172951;193113;206798;214918;317864;374853	1994;1995	122;131
Q3U2G2;Q61316	Q3U2G2;Q61316	Heat shock 70 kDa protein 4	Hspa4	54	54	51	76.5	283430000000	38531000000	40783000000	38857000000	17352000000	11920000000	41054000000	24095000000	22862000000	10364000000	37609000000	39860000000	45065000000	42361000000	34176000000	34662000000	40578000000	37241000000	34871000000	39706000000	37504000000	966;1174;1321;4845;8466;8521;9000;10147;10166;10285;10518;12114;12115;12858;13907;14309;17704;22352;22402;22618;22794;22795;22854;23903;24289;26375;26385;27769;29898;30334;30673;30841;31028;32136;33567;33858;34393;35135;37584;39137;39578;40042;40240;42521;42706;42707;44121;45153;45154;45968;46426;46973;47040;47886	True;True;True;True;True;True;True;True;True;True;True;True;True;True;True;True;True;True;True;True;True;True;True;True;True;True;True;True;True;True;True;True;True;True;True;True;True;True;True;True;True;True;True;True;True;True;True;True;True;True;True;True;True;True	1064;1287;1453;5327;9282;9347;9867;11115;11134;11287;11288;11556;13270;13271;14078;14079;15265;15708;19453;24627;24678;24910;25104;25105;25166;26307;26732;29016;29017;29032;29033;29034;29035;30557;33353;33354;33988;33989;34363;34364;34544;34756;36000;37580;37903;38490;38491;39292;41938;43642;44131;44633;44634;44635;44847;44848;47432;47636;47637;49187;50313;50314;51254;51752;52347;52421;53335	10955;10956;10957;10958;10959;10960;13120;13121;13122;13123;13124;13125;13126;13127;13128;13129;13130;13131;13132;13133;14758;14759;14760;14761;14762;14763;14764;14765;14766;14767;14768;14769;14770;14771;14772;14773;14774;14775;14776;14777;55615;55616;55617;55618;55619;55620;55621;55622;55623;55624;97193;97194;97195;97196;97197;97198;97199;97200;97201;97202;97203;97204;97205;97206;97924;97925;979…	7639;7640;7641;9133;9134;9135;9136;9137;9138;9139;9140;9141;9142;9143;9144;9145;9146;9147;10326;10327;10328;10329;10330;10331;10332;10333;10334;10335;10336;10337;10338;10339;10340;10341;10342;10343;38947;38948;38949;38950;69429;69430;69431;69432;69433;69434;69435;69436;69437;69438;69439;69440;69441;69910;69911;69912;69913;69914;69915;69916;69917;69918;69919;69920;69921;69922;69923;69924;69925;699…	7639;9136;10326;38950;69429;69916;73646;82921;83023;84198;86066;97733;97752;103995;113298;116426;148086;190385;190794;192505;193822;193842;194328;202900;205619;221984;222033;233822;252312;256455;258874;260366;262197;272144;283699;286202;289896;294968;313876;325522;328759;332094;333563;354084;355360;355372;367772;377644;377666;384236;387767;392420;393041;399480	2516;3426;3427;3428;3429;3430;3431;3432;3433;3434;3435;3436;3437;3438	106;120;157;171;277;292;301;309;522;595;630;712;744;747
P10639	P10639	Thioredoxin	Txn	7	7	7	83.8	282020000000	41349000000	33745000000	33499000000	20949000000	11389000000	41307000000	20713000000	29184000000	13096000000	36794000000	36123000000	31137000000	34039000000	35872000000	22833000000	37125000000	31699000000	37315000000	43854000000	34195000000	4641;8084;23870;28720;32487;44505;49411	True;True;True;True;True;True;True	5104;5105;8869;26273;31587;36379;49605;55005	53315;53316;53317;53318;53319;53320;53321;53322;53323;53324;53325;53326;53327;53328;53329;53330;53331;53332;53333;53334;53335;53336;53337;53338;53339;53340;53341;53342;53343;53344;53345;53346;53347;53348;53349;53350;53351;53352;53353;53354;53355;92937;92938;92939;92940;92941;92942;92943;92944;92945;92946;92947;92948;92949;92950;92951;92952;92953;92954;92955;92956;92957;92958;92959;92960;92961;929…	37297;37298;37299;37300;37301;37302;37303;37304;37305;37306;37307;37308;37309;37310;37311;37312;37313;37314;37315;37316;37317;37318;37319;37320;37321;37322;37323;37324;37325;37326;37327;37328;37329;37330;37331;37332;37333;37334;37335;66401;66402;66403;66404;66405;66406;66407;66408;66409;66410;66411;66412;66413;66414;66415;66416;66417;66418;66419;66420;66421;66422;66423;66424;66425;66426;66427;664…	37304;66416;202643;241417;275042;371772;411983	1905	74
Q9DBJ1	Q9DBJ1	Phosphoglycerate mutase 1	Pgam1	16	16	13	78.3	277120000000	38843000000	33604000000	38408000000	19343000000	10059000000	45278000000	20695000000	22254000000	8891200000	39748000000	39091000000	39733000000	40928000000	28816000000	19887000000	42037000000	29197000000	30663000000	32852000000	37617000000	2341;2584;5033;13558;17996;18001;18285;18984;33133;33134;35959;37005;40398;42060;45382;48101	True;True;True;True;True;True;True;True;True;True;True;True;True;True;True;True	2577;2853;2854;5531;14873;19777;19783;20095;20096;20868;37103;37104;37105;37106;40177;41298;45026;45027;46869;46870;50562;53562	26664;26665;26666;26667;26668;26669;26670;26671;26672;26673;26674;26675;26676;26677;26678;26679;26680;26681;26682;26683;29710;29711;29712;29713;29714;29715;29716;29717;29718;29719;29720;29721;29722;29723;29724;29725;29726;29727;57762;57763;57764;57765;57766;57767;57768;57769;57770;57771;57772;57773;57774;57775;57776;57777;57778;57779;57780;57781;57782;57783;57784;57785;57786;57787;57788;57789;577…	18684;18685;18686;18687;18688;18689;18690;18691;18692;18693;18694;18695;18696;18697;18698;18699;18700;18701;18702;18703;20839;20840;20841;20842;20843;40489;40490;40491;40492;40493;40494;40495;40496;40497;40498;40499;40500;40501;40502;40503;40504;40505;40506;40507;40508;40509;40510;40511;40512;40513;40514;40515;40516;40517;40518;40519;40520;40521;40522;40523;109992;109993;109994;109995;109996;1099…	18696;20843;40522;109992;151067;151095;153832;161132;280444;280477;301162;309334;334930;350137;379466;400883	1578;5379;5380;5381;5382	77;126;206;230;243
Q8CG16;F6QBW6	Q8CG16;F6QBW6	Complement C1r-A subcomponent;Complement C1r-A subcomponent heavy chain;Complement C1r-A subcomponent light chain	C1ra	34	34	7	64.5	272730000000	47062000000	48235000000	43184000000	22644000000	13895000000	29406000000	20639000000	16406000000	6219000000	25040000000	43770000000	53417000000	46818000000	42478000000	44026000000	28546000000	28589000000	23239000000	26275000000	26311000000	1461;2001;4604;5822;6254;7570;7893;8966;12049;12838;13902;15005;15171;15652;16649;17441;22343;24709;25110;26901;28405;28867;29699;30367;31138;31700;32669;33525;33621;35073;36990;44941;45501;47787	True;True;True;True;True;True;True;True;True;True;True;True;True;True;True;True;True;True;True;True;True;True;True;True;True;True;True;True;True;True;True;True;True;True	1608;2211;5063;6394;6861;8309;8310;8655;9830;13201;14057;15260;16493;16673;17191;18314;19170;24618;27185;27620;29620;31246;31742;33020;33021;34025;34872;35523;36579;37532;37640;37641;39229;41281;50076;50692;53223	16324;16325;16326;16327;16328;16329;22695;22696;22697;22698;22699;22700;22701;22702;22703;22704;22705;22706;22707;22708;22709;22710;22711;22712;22713;22714;22715;22716;22717;22718;22719;22720;22721;22722;22723;52973;52974;52975;52976;52977;52978;52979;52980;52981;52982;52983;66511;66512;66513;66514;66515;66516;66517;66518;66519;66520;66521;66522;66523;66524;66525;66526;66527;66528;66529;66530;665…	11416;11417;15832;15833;15834;15835;15836;15837;15838;15839;15840;15841;15842;15843;15844;15845;15846;15847;15848;15849;15850;15851;37058;37059;37060;37061;46880;46881;46882;46883;46884;46885;46886;46887;46888;46889;46890;46891;46892;46893;46894;46895;46896;46897;46898;46899;50625;62226;62227;62228;62229;62230;62231;62232;62233;62234;62235;62236;62237;62238;64835;64836;64837;64838;64839;64840;648…	11416;15832;37060;46882;50625;62226;64842;73346;97135;103787;113261;123891;125502;129395;139403;145827;190328;209157;212267;226719;238390;242257;250391;256710;263040;267946;276606;283424;284222;294521;309169;375824;380345;398791	1176;1177;4488	51;519;639
P09541;A2A6Q8;Q9CZ19;D6RFU4	P09541;A2A6Q8;Q9CZ19	Myosin light chain 4	Myl4	13	13	11	81.9	269780000000	25491000000	21542000000	28462000000	15109000000	13123000000	40382000000	34956000000	30656000000	12058000000	48005000000	23304000000	25771000000	32563000000	26342000000	45883000000	36195000000	55166000000	45881000000	49235000000	49269000000	2164;8090;8091;10677;11079;18898;19371;21914;29935;32256;32880;41714;45337	True;True;True;True;True;True;True;True;True;True;True;True;True	2384;8875;8876;8877;11728;12151;12152;20774;21288;24156;33411;33412;36132;36815;46487;46488;50512	24392;24393;24394;24395;24396;24397;24398;24399;24400;24401;24402;24403;24404;24405;24406;24407;24408;24409;93051;93052;93053;93054;93055;93056;93057;93058;93059;93060;93061;93062;93063;93064;93065;93066;93067;93068;93069;93070;93071;93072;93073;93074;93075;93076;93077;93078;93079;93080;93081;93082;93083;93084;93085;93086;93087;93088;93089;93090;93091;93092;93093;93094;93095;93096;93097;93098;930…	17067;17068;17069;17070;17071;17072;17073;17074;17075;17076;17077;17078;66519;66520;66521;66522;66523;66524;66525;66526;66527;66528;66529;66530;66531;66532;66533;66534;66535;66536;66537;66538;66539;66540;66541;66542;66543;66544;66545;66546;66547;66548;66549;66550;66551;66552;66553;66554;66555;66556;66557;87076;87077;87078;87079;87080;87081;87082;87083;87084;87085;87086;87087;87088;87089;87090;870…	17067;66522;66549;87092;89689;159897;164005;186385;252688;273203;278133;347051;379055	34;35;36;37	67;111;147;162
Q9QZF2	Q9QZF2	Glypican-1;Secreted glypican-1	Gpc1	27	27	27	64.3	268120000000	46395000000	39195000000	43390000000	19447000000	13915000000	34336000000	19326000000	17976000000	6982400000	27156000000	49866000000	45643000000	46741000000	36468000000	36722000000	33140000000	26623000000	24343000000	22060000000	28367000000	2363;6162;13947;14211;14333;15088;16778;17379;19314;28733;29057;29058;29288;31189;33394;33667;34550;34957;37915;37916;41951;42317;43522;45019;45924;48973;48974	True;True;True;True;True;True;True;True;True;True;True;True;True;True;True;True;True;True;True;True;True;True;True;True;True;True;True	2600;6760;15309;15596;15732;16583;18456;19105;21225;21226;31601;31975;31976;31977;31978;32334;32335;34927;34928;37391;37695;38653;39103;42297;42298;46745;47201;48532;50170;51204;54514;54515;54516;54517	26884;26885;26886;26887;26888;26889;26890;26891;26892;26893;26894;26895;26896;26897;26898;26899;26900;26901;26902;26903;26904;26905;26906;26907;26908;26909;26910;26911;26912;26913;26914;26915;26916;26917;26918;26919;26920;26921;26922;70597;70598;70599;70600;70601;70602;70603;70604;70605;70606;70607;70608;70609;70610;70611;70612;70613;160507;160508;160509;160510;160511;160512;160513;160514;160515;…	18848;18849;18850;18851;18852;18853;18854;18855;18856;18857;18858;18859;18860;18861;18862;18863;18864;18865;18866;18867;18868;18869;18870;18871;18872;18873;18874;18875;18876;18877;18878;18879;18880;18881;18882;18883;18884;18885;18886;18887;18888;49821;49822;49823;49824;49825;49826;49827;49828;49829;49830;49831;49832;49833;49834;113600;113601;113602;113603;113604;113605;113606;113607;113608;113609…	18877;49828;113609;115559;116543;124859;140369;144976;163545;241546;243932;243937;246126;263421;282593;284843;290892;293759;316083;316093;348926;352507;362587;376438;383772;408243;408273	5661;5662;5663;5664;5665;5666	73;83;296;404;428;450
Q6ZWQ9;D3YV37;D3Z249	Q6ZWQ9		Myl12a	13	13	3	83.7	267500000000	42089000000	27675000000	35992000000	17626000000	14714000000	36375000000	23468000000	20212000000	12809000000	36540000000	40852000000	34654000000	37886000000	26527000000	29476000000	29831000000	31385000000	24070000000	36579000000	30944000000	3688;8081;8082;8475;10004;10005;13707;13708;16192;22458;26476;30248;31600	True;True;True;True;True;True;True;True;True;True;True;True;True	4068;4069;8864;8865;8866;8867;9292;9293;9294;10959;10960;10961;10962;15040;15041;17801;24739;29145;33897;35414	42028;42029;42030;42031;42032;42033;42034;42035;42036;42037;42038;42039;42040;42041;42042;42043;42044;42045;42046;42047;42048;42049;42050;42051;42052;42053;42054;42055;42056;42057;42058;42059;42060;42061;42062;42063;42064;42065;42066;42067;42068;42069;42070;42071;42072;42073;42074;42075;42076;42077;42078;42079;42080;42081;92825;92826;92827;92828;92829;92830;92831;92832;92833;92834;92835;92836;928…	29323;29324;29325;29326;29327;29328;29329;29330;29331;29332;29333;29334;29335;29336;29337;29338;29339;29340;29341;29342;29343;29344;29345;29346;29347;29348;29349;29350;29351;29352;29353;29354;29355;29356;29357;29358;29359;29360;29361;29362;29363;29364;29365;29366;29367;29368;66317;66318;66319;66320;66321;66322;66323;66324;66325;66326;66327;66328;66329;66330;66331;66332;66333;66334;66335;66336;663…	29361;66321;66384;69559;81850;81882;111306;111324;134397;191252;222852;255694;267173	3374;3375;3377;4107;4108	25;40;57;61;130
Q99K51;B1AX58;Q61233;Q3V0K9	Q99K51;B1AX58	Plastin-3	Pls3	42	42	42	70.3	267330000000	38027000000	31194000000	35802000000	16669000000	9263800000	40011000000	24901000000	23904000000	8089400000	39463000000	39335000000	35902000000	40004000000	31300000000	27707000000	41102000000	36664000000	33720000000	29116000000	38603000000	2089;2649;3878;4212;5391;5696;8228;9137;18897;19386;19997;19998;20965;21539;22591;22644;24082;26393;26509;27738;28133;29145;29146;29539;30101;30489;30490;32471;34117;35520;37117;38086;41619;43826;47455;47456;47603;48118;48181;49142;49143;49483	True;True;True;True;True;True;True;True;True;True;True;True;True;True;True;True;True;True;True;True;True;True;True;True;True;True;True;True;True;True;True;True;True;True;True;True;True;True;True;True;True;True	2306;2951;4280;4636;5913;6250;6251;9024;10020;20772;20773;21303;21304;21966;21967;23091;23723;24882;24936;26508;29049;29181;30525;30955;32116;32117;32743;32744;33682;33683;34159;34160;34161;36361;38187;39710;39711;41417;42489;46384;48866;52871;52872;53029;53579;53649;54717;54718;55081	23667;23668;23669;23670;30730;30731;30732;30733;30734;30735;30736;30737;30738;30739;30740;30741;30742;30743;30744;30745;30746;30747;30748;30749;30750;30751;30752;44448;44449;44450;44451;44452;44453;44454;44455;44456;44457;44458;44459;48424;48425;48426;48427;48428;48429;48430;48431;48432;48433;48434;48435;48436;48437;48438;48439;48440;48441;48442;48443;48444;48445;48446;48447;48448;48449;61672;616…	16519;16520;16521;21490;21491;21492;21493;21494;21495;21496;21497;21498;21499;21500;21501;21502;21503;21504;21505;21506;21507;21508;21509;21510;21511;31078;31079;31080;31081;31082;31083;31084;33932;33933;33934;33935;33936;33937;33938;33939;33940;33941;33942;33943;33944;33945;33946;33947;33948;33949;33950;33951;33952;33953;43287;43288;43289;43290;45541;45542;45543;45544;45545;45546;45547;45548;455…	16520;21504;31078;33945;43289;45544;67561;74811;159870;164155;168845;168856;177674;182753;192332;192656;204139;222097;223063;233669;236568;244820;244822;248528;254243;257509;257525;274857;288010;297583;310109;317419;346308;365382;396311;396314;397526;400995;401572;409565;409567;412450	265;266;267;268;269;270	149;169;265;325;340;614
Q05793	Q05793	Basement membrane-specific heparan sulfate proteoglycan core protein;Endorepellin;LG3 peptide	Hspg2	176	7	7	60.4	262090000000	44428000000	39000000000	36720000000	25447000000	18042000000	28703000000	17868000000	15621000000	9255300000	27008000000	38134000000	42740000000	37223000000	37999000000	47278000000	27321000000	19125000000	17024000000	33917000000	23598000000	177;900;901;922;1047;1395;1628;1629;2109;2110;2437;2519;2577;2609;2855;2961;3046;3534;3535;3587;4204;4274;4303;4338;4356;4377;4404;4411;4520;4531;4547;4582;4695;4712;4759;4768;4774;4926;5539;5826;5844;6093;6094;6216;6803;7033;8030;8441;8991;9119;9340;9341;11044;11459;11460;11626;12089;13065;13360;13525;13526;13639;13794;15275;15278;15416;16117;16147;16304;16504;16691;16875;16884;18590;18627;18661…	False;False;True;False;False;False;False;False;False;False;False;False;False;False;False;False;False;False;False;False;False;False;False;False;False;True;False;False;False;False;False;True;False;False;False;False;False;False;False;False;False;False;False;False;False;False;False;False;False;False;False;False;False;False;False;False;False;False;False;False;False;False;True;False;False;False;False;F…	190;992;993;994;1017;1018;1154;1537;1796;1797;2329;2330;2682;2774;2842;2843;2892;2893;3175;3285;3373;3901;3902;3963;4628;4705;4736;4776;4794;4818;4819;4848;4855;4856;4972;4984;5000;5040;5041;5165;5185;5236;5245;5251;5252;5411;6071;6398;6416;6687;6688;6820;7483;7741;8807;8808;9253;9858;10001;10244;10245;10246;10247;12115;12558;12559;12741;13242;13243;14304;14654;14839;14840;14966;15136;15137;16785…	1982;1983;1984;1985;1986;1987;1988;1989;1990;1991;1992;1993;1994;1995;1996;1997;1998;1999;2000;10137;10138;10139;10140;10141;10142;10143;10144;10145;10146;10147;10148;10149;10150;10151;10152;10153;10154;10155;10156;10157;10158;10159;10160;10161;10162;10163;10164;10165;10166;10167;10168;10169;10170;10171;10172;10173;10174;10175;10176;10177;10178;10179;10180;10181;10182;10183;10184;10185;10186;1018…
P61982	P61982	14-3-3 protein gamma;14-3-3 protein gamma, N-terminally processed	Ywhag	19	15	12	80.2	259590000000	30720000000	37343000000	37122000000	19092000000	11008000000	50997000000	24216000000	15969000000	5588200000	27539000000	43397000000	35773000000	36717000000	32773000000	27012000000	39425000000	43012000000	30700000000	21890000000	38422000000	3721;4253;6886;7441;9351;9761;23066;23067;24752;30065;30385;31213;31215;32123;35613;40535;43870;48237;48828	True;True;True;False;True;True;False;True;True;True;True;False;False;True;True;True;True;True;True	4106;4680;7582;8174;8175;10259;10260;10702;25391;25392;25393;27234;33621;33622;33623;33624;34044;34954;34956;35987;39810;45181;48917;53714;53715;53716;54358	42392;42393;42394;42395;42396;42397;48952;48953;48954;48955;48956;48957;48958;48959;48960;48961;48962;48963;48964;48965;48966;48967;48968;48969;48970;79229;79230;79231;79232;85426;85427;85428;85429;85430;85431;85432;85433;85434;85435;85436;85437;85438;85439;85440;85441;85442;85443;85444;85445;85446;85447;85448;85449;85450;85451;85452;85453;85454;85455;85456;85457;85458;85459;85460;85461;85462;854…	29588;29589;29590;34310;34311;34312;34313;34314;34315;34316;34317;34318;34319;34320;34321;34322;34323;56229;56230;56231;56232;60796;60797;60798;60799;60800;60801;60802;60803;60804;60805;60806;60807;60808;60809;60810;60811;60812;60813;60814;60815;60816;60817;60818;60819;60820;60821;60822;60823;60824;60825;60826;60827;60828;60829;60830;60831;60832;60833;60834;60835;60836;60837;60838;60839;60840;608…	29588;34311;56231;60803;76716;80058;195787;195801;209440;253891;256837;263636;263678;272050;298307;336044;365773;402090;407142	1060;2771;2772;2773;2774	1;23;27;165;223
Q8BHN3;Q8BHN3-2;Q8BHN3-3	Q8BHN3;Q8BHN3-2;Q8BHN3-3	Neutral alpha-glucosidase AB	Ganab	50	50	50	66.7	255830000000	35614000000	31501000000	31674000000	16662000000	10522000000	39865000000	23610000000	20191000000	8532500000	37658000000	33851000000	39519000000	35445000000	32276000000	25995000000	37556000000	36480000000	33284000000	32427000000	37056000000	1075;1536;2242;5128;5289;5296;5427;5846;6067;6432;9105;10616;10617;12429;13307;13551;15373;15898;17860;18109;20302;20303;21437;22712;23674;27620;27889;28287;28919;29593;30857;31527;32271;32750;33608;35436;35801;35895;38015;38425;38797;42512;45470;46018;46825;47195;47890;48076;48512;49339	True;True;True;True;True;True;True;True;True;True;True;True;True;True;True;True;True;True;True;True;True;True;True;True;True;True;True;True;True;True;True;True;True;True;True;True;True;True;True;True;True;True;True;True;True;True;True;True;True;True	1184;1693;2469;5632;5808;5815;5951;6418;6659;6660;7050;9985;9986;11663;11664;13613;14597;14866;16891;17448;17449;19626;19900;22307;22308;23610;25016;26062;30400;30682;31123;31797;31798;32843;32844;34563;35335;36147;36668;37626;37627;39620;40012;40109;42407;42858;43254;47423;50658;51309;52180;52595;53339;53535;53536;54017;54926	12131;12132;12133;12134;12135;12136;17384;17385;17386;17387;17388;17389;17390;17391;17392;17393;17394;17395;17396;17397;17398;17399;25216;25217;25218;25219;25220;25221;25222;25223;25224;25225;25226;25227;25228;25229;25230;25231;25232;25233;25234;25235;25236;25237;25238;25239;25240;25241;25242;25243;25244;25245;58770;58771;58772;58773;58774;58775;58776;58777;58778;58779;58780;58781;58782;58783;587…	8449;8450;12115;12116;12117;12118;12119;12120;17652;17653;17654;17655;17656;17657;17658;17659;17660;17661;17662;17663;17664;17665;17666;17667;17668;17669;17670;17671;17672;17673;17674;17675;17676;17677;41188;41189;41190;41191;41192;41193;41194;41195;41196;41197;41198;41199;41200;41201;41202;41203;41204;41205;41206;41207;41208;41209;41210;42503;42504;42505;42506;42507;42508;42509;42510;42511;42512…	8450;12115;17668;41188;42512;42590;43514;47151;49240;52265;74521;86680;86681;100442;107956;109962;127084;131288;149694;152135;171609;171622;181973;193241;201154;232628;234650;237669;242654;249213;260548;266620;273326;277142;284007;297050;299790;300634;316931;320167;322921;354007;380138;384711;391005;394423;399512;400704;404217;411195	4318;4319;4320;4321;4322;4323;4324;4325	176;253;293;338;581;666;726;895
P12023;P12023-3;E9QL91;Q3TWF3;P12023-2;E9PWY4	P12023;P12023-3;E9QL91;Q3TWF3;P12023-2;E9PWY4	Amyloid beta A4 protein;N-APP;Soluble APP-alpha;Soluble APP-beta;C99;Beta-amyloid protein 42;Beta-amyloid protein 40;C83;P3(42);P3(40);C80;Gamma-secretase C-terminal fragment 59;Gamma-secretase C-terminal fragment 57;Gamma-secretase C-terminal fragment 50;C31	App	21	21	19	35.2	255430000000	43030000000	36988000000	41537000000	24704000000	13421000000	30982000000	15993000000	16309000000	5296700000	27168000000	38967000000	37266000000	42511000000	40823000000	39701000000	26276000000	22168000000	21470000000	21050000000	24426000000	3919;4624;4907;9149;10752;11412;16039;21713;26534;29119;29206;34984;39584;40044;41445;43919;43920;44155;47689;48065;48878	True;True;True;True;True;True;True;True;True;True;True;True;True;True;True;True;True;True;True;True;True	4326;5083;5392;10032;11808;11809;12506;17603;23935;23936;29213;29214;29215;32072;32073;32210;32211;39132;39133;44138;44139;44637;44638;46187;48969;48970;49224;53120;53523;54411	44865;44866;44867;44868;44869;44870;44871;44872;44873;44874;44875;44876;44877;44878;44879;44880;44881;44882;44883;44884;53137;53138;53139;53140;53141;53142;53143;53144;53145;53146;53147;53148;53149;53150;53151;53152;53153;53154;53155;53156;53157;53158;53159;53160;53161;56245;56246;56247;56248;56249;56250;56251;56252;56253;56254;56255;56256;56257;56258;56259;56260;56261;56262;104891;104892;104893;…	31375;31376;31377;31378;31379;31380;31381;31382;31383;31384;31385;31386;31387;31388;31389;31390;31391;37177;37178;37179;37180;37181;37182;37183;37184;37185;37186;37187;37188;37189;37190;37191;37192;37193;37194;37195;37196;39405;39406;39407;39408;39409;39410;39411;39412;39413;39414;39415;39416;39417;39418;39419;39420;39421;39422;74883;74884;74885;74886;74887;74888;74889;74890;74891;74892;74893;875…	31379;37186;39406;74892;87568;92040;133002;184502;223928;244538;245436;293941;328812;332139;344772;366156;366160;368017;398165;400636;407478	1954;1955;1956;1957;1958;1959;1960;1961;1962	43;45;141;170;458;531;580;594;671
Q99PT1	Q99PT1	Rho GDP-dissociation inhibitor 1	Arhgdia	17	17	17	76	252550000000	35528000000	36532000000	36735000000	17164000000	11712000000	32953000000	21391000000	19862000000	9538700000	31138000000	35713000000	42256000000	36957000000	31411000000	28538000000	28969000000	29917000000	27520000000	31549000000	31306000000	808;952;5240;9630;13704;28107;28108;38410;38411;38412;39614;40791;40792;40865;43599;45939;48785	True;True;True;True;True;True;True;True;True;True;True;True;True;True;True;True;True	890;891;1049;5756;10562;15037;30920;30921;42842;42843;42844;44169;45464;45465;45545;45546;48615;51222;54312	9032;9033;9034;9035;9036;9037;9038;9039;9040;9041;9042;9043;9044;9045;9046;9047;9048;9049;9050;9051;9052;9053;9054;9055;9056;9057;9058;9059;9060;9061;9062;9063;9064;9065;9066;9067;9068;9069;9070;9071;9072;9073;9074;9075;9076;9077;9078;9079;9080;9081;9082;9083;9084;9085;9086;9087;9088;9089;9090;9091;9092;9093;9094;9095;10821;10822;10823;10824;10825;10826;10827;10828;10829;10830;10831;10832;10833;1…	6295;6296;6297;6298;6299;6300;6301;6302;6303;6304;6305;6306;6307;6308;6309;6310;6311;6312;6313;6314;6315;6316;6317;6318;6319;6320;6321;6322;6323;6324;6325;6326;6327;6328;6329;6330;6331;6332;6333;6334;6335;6336;6337;6338;7556;7557;7558;7559;7560;7561;7562;7563;7564;7565;7566;7567;7568;7569;7570;7571;7572;7573;7574;42217;42218;42219;79214;79215;79216;79217;111288;111289;236309;236310;236311;236312;…	6332;7561;42219;79215;111289;236317;236346;320023;320044;320046;329042;338466;338490;338994;363242;384043;406648	5082;5083;5084	126;145;162
P02463	P02463	Collagen alpha-1(IV) chain;Arresten	Col4a1	20	20	18	20.1	246480000000	42216000000	33716000000	39850000000	18432000000	12091000000	33245000000	19605000000	14833000000	6288200000	26200000000	40656000000	38632000000	41378000000	35172000000	42417000000	29052000000	25051000000	20494000000	24118000000	25660000000	1567;1568;5753;13657;14483;14484;14812;15040;15046;15933;16387;16432;16922;17029;17628;18761;20827;30486;37264;47281	True;True;True;True;True;True;True;True;True;True;True;True;True;True;True;True;True;True;True;True	1725;1726;6315;14985;14986;15898;15899;16276;16533;16539;16540;17489;18017;18018;18069;18613;18732;19372;20622;22890;34154;34155;34156;41581;52687	17814;17815;17816;17817;17818;17819;17820;17821;17822;17823;17824;17825;17826;17827;17828;17829;17830;17831;17832;17833;17834;17835;17836;17837;17838;17839;17840;17841;17842;17843;17844;17845;17846;17847;17848;17849;17850;17851;17852;17853;17854;17855;17856;17857;17858;65568;65569;156709;156710;156711;156712;156713;156714;156715;156716;156717;156718;156719;156720;156721;156722;156723;156724;15672…	12431;12432;12433;12434;12435;12436;12437;12438;12439;12440;12441;12442;12443;12444;12445;12446;12447;12448;12449;12450;12451;12452;12453;12454;12455;12456;12457;12458;12459;12460;12461;12462;12463;12464;12465;12466;12467;12468;46176;110846;110847;110848;110849;110850;110851;110852;110853;110854;110855;110856;110857;110858;110859;110860;110861;110862;110863;110864;110865;110866;110867;110868;1108…	12435;12452;46176;110854;117895;117902;121918;124215;124407;131802;136336;137031;141696;142552;147292;158503;176482;257496;311347;394986	1706;1707;1708;1709;1710;1711	155;1434;1500;1529;1531;1533
Q60854;F8WIV2;E9Q096;E9Q108;E9Q0P9;E9Q3Y1;E9Q6X2;E9PYY0;E9PZQ9;E9Q4R2;E9Q5Q5	Q60854;F8WIV2;E9Q096	Serpin B6	Serpinb6;Serpinb6a	22	22	19	78.6	245060000000	33857000000	34171000000	32839000000	19046000000	10028000000	35776000000	21167000000	19698000000	7635700000	30841000000	33938000000	35925000000	32192000000	30625000000	23946000000	29281000000	28567000000	23350000000	25824000000	26033000000	1203;4795;11564;12033;12695;12797;13971;17164;20582;20656;23940;24821;29137;29189;30054;32009;33541;34187;34276;40678;41359;42152	True;True;True;True;True;True;True;True;True;True;True;True;True;True;True;True;True;True;True;True;True;True	1317;1318;1319;5274;12670;13184;13904;14011;14012;15334;18871;18872;22614;22694;22695;22696;26348;26349;27307;27308;32103;32104;32184;32185;33606;33607;35856;35857;35858;35859;37549;37550;37551;38262;38360;45345;46095;47012	13442;13443;13444;13445;13446;13447;13448;13449;13450;13451;13452;13453;13454;13455;13456;13457;13458;13459;13460;13461;13462;13463;13464;13465;13466;13467;13468;13469;13470;13471;13472;13473;13474;13475;13476;13477;13478;13479;13480;13481;13482;13483;13484;13485;13486;55101;55102;55103;55104;55105;55106;55107;55108;55109;55110;55111;55112;55113;55114;55115;55116;55117;55118;55119;55120;131455;13…	9383;9384;9385;9386;9387;9388;9389;9390;9391;9392;9393;9394;9395;9396;9397;9398;9399;9400;9401;9402;9403;9404;9405;9406;9407;9408;9409;9410;9411;9412;9413;9414;9415;9416;9417;9418;38598;38599;38600;38601;38602;38603;38604;38605;38606;38607;38608;38609;38610;38611;38612;38613;93077;93078;93079;93080;93081;93082;93083;93084;93085;93086;93087;93088;93089;93090;93091;93092;93093;93094;93095;93096;930…	9401;38598;93077;97037;102777;103510;113767;143472;174326;175138;203164;209893;244749;245275;253821;270650;283528;288414;289128;337510;343758;350920	3682;3683;3684;3685;3686;3687;3688;3689;3690;3691;3692;3693;3694;3695;3696	1;32;40;43;53;201;202;210;232;235;264;284;293;339;340
Q62165	Q62165	Dystroglycan;Alpha-dystroglycan;Beta-dystroglycan	Dag1	28	28	28	44.5	244060000000	42912000000	28755000000	38446000000	18245000000	13526000000	32369000000	16608000000	17254000000	5972100000	29971000000	40617000000	36401000000	37260000000	33549000000	37189000000	30191000000	23376000000	24106000000	24846000000	27626000000	367;2424;8185;9051;10692;15221;17271;17300;17910;21159;23104;23105;24271;24565;24591;27417;28079;28584;29893;30859;31659;32294;33267;35062;40385;43709;46614;47115	True;True;True;True;True;True;True;True;True;True;True;True;True;True;True;True;True;True;True;True;True;True;True;True;True;True;True;True	402;2665;8975;9924;9925;11743;16727;18985;19014;19683;19684;23311;25437;25438;26712;26713;26714;27033;27059;30179;30888;31436;33343;33344;33345;34566;35478;36172;37257;39218;45011;45012;48737;51955;52504	3956;3957;3958;3959;3960;3961;3962;3963;3964;3965;3966;3967;3968;3969;3970;3971;3972;3973;3974;3975;3976;3977;3978;3979;3980;3981;3982;27589;27590;27591;27592;27593;27594;27595;27596;27597;27598;94058;94059;94060;94061;94062;94063;94064;94065;94066;94067;94068;94069;94070;94071;94072;94073;94074;94075;94076;94077;94078;94079;94080;94081;94082;94083;94084;94085;94086;94087;94088;94089;103783;10378…	2793;2794;2795;2796;2797;2798;2799;2800;2801;2802;2803;2804;2805;2806;2807;2808;2809;19358;19359;19360;19361;19362;19363;19364;19365;19366;67238;67239;67240;67241;67242;67243;67244;67245;67246;67247;67248;67249;67250;67251;67252;67253;67254;67255;67256;67257;67258;67259;67260;67261;67262;67263;67264;67265;67266;73996;73997;73998;73999;74000;74001;74002;74003;74004;74005;74006;74007;74008;74009;74…	2798;19364;67243;74030;87169;125835;144247;144404;150229;179403;196146;196159;205502;207859;208048;230756;236050;240099;252275;260563;267617;273449;281332;294473;334824;364257;389174;393635	3838;3839;3840;3841;3842;3843;3844	212;223;236;240;284;559;575
Q6ZQ38;D3YWC5	Q6ZQ38	Cullin-associated NEDD8-dissociated protein 1	Cand1	60	60	59	62.2	243160000000	31641000000	28759000000	32036000000	17158000000	9943800000	40480000000	18573000000	21534000000	8024500000	35014000000	33940000000	35085000000	34338000000	34210000000	31834000000	37043000000	27064000000	33487000000	33928000000	33428000000	83;130;131;717;1836;2466;3269;3741;4561;4575;6200;6422;6519;9207;9501;10737;11452;11705;11751;11821;12069;12070;13092;13736;17609;17881;18845;18846;19338;19406;19950;20334;21556;21869;23544;23638;24909;25514;27839;28088;29690;29692;30371;30741;32133;33328;33637;33921;34168;35458;37142;39309;40205;41737;42981;43080;43215;43474;43475;45042	True;True;True;True;True;True;True;True;True;True;True;True;True;True;True;True;True;True;True;True;True;True;True;True;True;True;True;True;True;True;True;True;True;True;True;True;True;True;True;True;True;True;True;True;True;True;True;True;True;True;True;True;True;True;True;True;True;True;True;True	89;139;140;794;2030;2031;2715;3613;4128;5016;5032;6802;7040;7140;10098;10419;11791;12550;12551;12829;12877;12952;12953;13221;13222;14335;14336;14337;15072;19349;19652;19653;20715;20716;21251;21324;21918;22343;23741;24106;25923;26024;27407;28062;30628;30898;33006;33007;33008;33011;33012;34029;34435;35997;37319;37661;37972;38243;39642;41443;43834;43835;44807;46513;47933;48046;48198;48476;48477;50194	857;1500;1501;1502;1503;1504;1505;1506;1507;1508;1509;1510;1511;1512;1513;1514;1515;1516;1517;1518;1519;1520;1521;1522;1523;1524;7926;7927;7928;7929;7930;7931;7932;7933;7934;7935;7936;7937;7938;7939;7940;7941;7942;7943;7944;7945;7946;7947;20896;20897;20898;20899;20900;20901;20902;20903;20904;20905;20906;20907;20908;20909;20910;20911;20912;28281;28282;28283;28284;28285;28286;28287;28288;28289;2829…	628;1087;1088;1089;1090;1091;1092;1093;1094;1095;1096;1097;1098;1099;1100;1101;1102;1103;1104;5597;5598;5599;5600;5601;5602;5603;5604;5605;5606;5607;5608;5609;5610;5611;5612;5613;5614;5615;14585;14586;14587;14588;14589;14590;14591;19837;19838;19839;19840;19841;19842;19843;19844;19845;19846;26302;26303;26304;26305;26306;26307;26308;26309;26310;26311;26312;29757;29758;29759;29760;29761;29762;29763;…	628;1093;1102;5607;14591;19843;26309;29765;36779;36844;50102;52159;52775;75473;77906;87448;92359;94422;94696;95338;97326;97332;106010;111556;147211;149928;159348;159356;163721;164279;168588;172115;182962;185810;200117;200945;210518;215393;234340;236145;250265;250292;256731;259555;272136;281880;284629;286529;288307;297161;310292;326694;333296;347190;357522;358473;359868;361997;362000;376701	4088;4089;4090;4091;4092;4093;4094;4095;4096;4097	25;31;95;367;593;778;1068;1121;1126;1195
Q6PI17;P25785;B1AQJ3	Q6PI17;P25785;B1AQJ3	Metalloproteinase inhibitor 2	Timp2	14	14	14	60.9	241800000000	37752000000	41206000000	36455000000	21224000000	10810000000	30253000000	20537000000	14538000000	5345500000	23684000000	35479000000	43872000000	37940000000	41236000000	36178000000	31949000000	32171000000	22346000000	16494000000	23324000000	4705;6029;6030;11429;11430;11796;12321;14069;29497;33940;36175;36799;37436;49275	True;True;True;True;True;True;True;True;True;True;True;True;True;True	5175;5176;5177;6616;6617;12525;12526;12925;13496;15440;32673;32674;37994;40409;41077;41772;54858	54041;54042;54043;54044;54045;54046;54047;54048;54049;54050;54051;54052;54053;54054;54055;54056;54057;54058;54059;54060;54061;54062;54063;54064;54065;54066;54067;54068;54069;54070;54071;54072;54073;54074;54075;54076;54077;54078;54079;69223;69224;69225;69226;69227;69228;69229;69230;69231;69232;69233;69234;69235;69236;69237;69238;69239;69240;69241;69242;69243;69244;69245;69246;69247;69248;69249;692…	37829;37830;37831;37832;37833;37834;37835;37836;37837;37838;37839;37840;37841;37842;37843;37844;37845;37846;37847;37848;37849;37850;37851;37852;37853;37854;48842;48843;48844;48845;48846;48847;48848;48849;48850;48851;48852;48853;48854;48855;48856;48857;48858;48859;48860;48861;48862;48863;48864;48865;48866;48867;48868;48869;48870;48871;48872;48873;48874;48875;48876;48877;48878;48879;48880;48881;488…	37848;48880;48913;92182;92185;95185;99370;114474;248041;286638;303006;307800;312606;410761	2218;2219;2220	122;161;175
Q9DCT8	Q9DCT8	Cysteine-rich protein 2	Crip2	12	12	12	67.3	240860000000	34198000000	32067000000	31265000000	16676000000	14023000000	28929000000	24830000000	20204000000	7872500000	30799000000	36907000000	32364000000	34494000000	33925000000	38569000000	29924000000	41087000000	33878000000	34725000000	32741000000	3473;7841;17365;17371;32441;32442;33244;37061;42020;42021;42022;43131	True;True;True;True;True;True;True;True;True;True;True;True	3833;3834;8603;19088;19096;36331;36332;37231;41357;46823;46824;46825;48107	39758;39759;39760;39761;39762;39763;39764;39765;39766;39767;39768;39769;39770;39771;39772;39773;39774;39775;39776;39777;39778;39779;39780;39781;39782;39783;39784;90055;90056;90057;90058;90059;90060;90061;90062;90063;202467;202468;202469;202470;202471;202472;202473;202474;202475;202476;202477;202478;202479;202480;202481;202482;202483;202484;202485;202551;202552;202553;202554;202555;202556;202557;2…	27776;27777;27778;27779;27780;27781;27782;27783;27784;27785;27786;27787;27788;27789;27790;27791;27792;27793;27794;27795;27796;27797;27798;64313;64314;64315;64316;64317;64318;64319;64320;64321;144833;144834;144835;144836;144837;144838;144839;144840;144841;144842;144843;144844;144905;144906;144907;144908;144909;144910;144911;144912;274697;274698;274699;274700;274701;274702;274703;274704;274705;2747…	27776;64320;144844;144909;274701;274714;281121;309741;349640;349654;349673;359216	5414	125
Q07797;E9Q5X5	Q07797	Galectin-3-binding protein	Lgals3bp	21	21	18	50.8	236740000000	38247000000	36213000000	42368000000	17475000000	11103000000	29391000000	17100000000	12949000000	6906900000	24985000000	32966000000	39766000000	39637000000	32554000000	35780000000	25476000000	23006000000	18661000000	23030000000	20906000000	3805;16375;16773;19754;23301;24250;28531;28532;28986;36123;37635;38719;42111;42171;42353;43692;45402;47199;47757;49122;49130	True;True;True;True;True;True;True;True;True;True;True;True;True;True;True;True;True;True;True;True;True	4202;18003;18004;18451;21701;21702;25665;26691;31379;31380;31868;31869;40354;40355;41995;43168;43169;46948;46949;47035;47036;47244;48717;48718;50584;52599;53193;54697;54705	43532;43533;43534;43535;43536;43537;43538;43539;43540;43541;43542;43543;43544;43545;43546;43547;43548;43549;43550;43551;43552;190684;190685;190686;190687;190688;190689;190690;190691;190692;190693;190694;190695;190696;190697;190698;190699;190700;190701;190702;190703;190704;190705;190706;190707;190708;190709;190710;190711;190712;190713;190714;190715;190716;190717;190718;190719;190720;190721;190722;…	30363;30364;30365;30366;30367;30368;30369;30370;30371;30372;30373;30374;30375;30376;30377;30378;30379;30380;136237;136238;136239;136240;136241;136242;136243;136244;136245;136246;136247;136248;136249;136250;136251;136252;136253;136254;136255;136256;136257;136258;136259;136260;136261;136262;136263;136264;136265;136266;136267;136268;140334;167084;167085;167086;167087;198002;198003;198004;198005;1980…	30374;136254;140334;167086;198014;205345;239756;239764;243253;302643;314170;322332;350550;351159;352781;364096;379627;394445;398590;409413;409491	3320;3321;3322;3323;3324;3325;3326	87;109;195;202;221;378;419
E9QA15;F6T2Z7;F7CVG0	E9QA15		Cald1	33	33	1	39.1	234660000000	28809000000	22132000000	29792000000	15066000000	11442000000	32850000000	27025000000	22818000000	10579000000	34143000000	35603000000	26901000000	32128000000	31988000000	34794000000	32978000000	40276000000	34777000000	41447000000	37313000000	3096;8048;8768;8889;8890;14833;16988;20929;24158;27442;29804;29883;30407;30408;31862;32263;32377;33298;33924;34928;34929;35763;35938;36290;36409;36765;36776;38120;39211;39992;45237;45238;48407	True;True;True;True;True;True;True;True;True;True;True;True;True;True;True;True;True;True;True;True;True;True;True;True;True;True;True;True;True;True;True;True;True	3427;8827;9614;9615;9747;9748;16299;18688;23050;26591;30205;33203;33329;34067;34068;35693;36139;36263;37288;37975;39071;39072;39970;40155;40529;40649;41041;41052;42524;43721;44573;50403;50404;53906	35668;35669;35670;35671;35672;35673;35674;35675;35676;35677;35678;35679;35680;35681;35682;92473;92474;92475;92476;92477;92478;92479;92480;100792;100793;100794;100795;100796;100797;100798;100799;100800;100801;100802;100803;100804;100805;100806;100807;102173;102174;102175;102176;102177;102178;102179;102180;102181;102182;102183;102184;102185;102186;102187;102188;102189;102190;102191;102192;102193;10…	24919;24920;24921;24922;24923;24924;24925;24926;24927;24928;24929;24930;66078;66079;66080;66081;66082;71962;71963;71964;71965;71966;71967;71968;72906;72907;72908;72909;72910;72911;72912;72913;72914;72915;72916;72917;72918;72919;72920;72921;72922;122037;122038;122039;122040;122041;142276;142277;142278;142279;142280;142281;142282;142283;142284;142285;177453;177454;177455;177456;177457;177458;204782…	24920;66079;71964;72912;72918;122040;142285;177455;204783;230960;251374;252088;256953;256957;269545;273247;274177;281644;286541;293557;293588;299478;300904;304073;304799;307602;307672;317662;325973;331707;378337;378345;403508	707	18
P97457;F6ULR7	P97457;F6ULR7	Myosin regulatory light chain 2, skeletal muscle isoform	Mylpf	13	13	13	79.3	231440000000	23127000000	21417000000	24420000000	10445000000	8144900000	33627000000	25866000000	27814000000	12265000000	44316000000	23162000000	25433000000	27975000000	17063000000	25104000000	29300000000	35203000000	34047000000	37884000000	33548000000	1222;7494;8093;8094;8266;8490;14094;30509;30891;31405;34086;35527;36767	True;True;True;True;True;True;True;True;True;True;True;True;True	1340;1341;8230;8231;8879;8880;9066;9067;9310;9311;15469;34184;34185;34186;34603;35192;35193;38151;39719;39720;41043	13694;13695;13696;13697;13698;13699;13700;13701;13702;13703;13704;13705;13706;13707;13708;13709;13710;13711;13712;13713;13714;13715;13716;13717;13718;13719;13720;13721;13722;13723;13724;13725;13726;13727;13728;13729;13730;13731;13732;13733;13734;13735;13736;13737;86208;86209;86210;86211;86212;86213;86214;86215;86216;86217;86218;86219;86220;86221;86222;86223;86224;93104;93105;93106;93107;93108;931…	9583;9584;9585;9586;9587;9588;9589;9590;9591;9592;9593;9594;9595;9596;9597;9598;9599;9600;9601;9602;9603;9604;9605;9606;9607;9608;9609;9610;9611;9612;9613;9614;9615;9616;9617;9618;9619;9620;9621;9622;61499;61500;61501;61502;61503;61504;61505;66559;66560;66561;66562;66563;66564;66565;66566;66567;66568;66569;66570;66571;66572;66573;66574;66575;66576;66577;66578;66579;66580;66581;66582;66583;66584;6…	9609;61503;66568;66584;67870;69651;114727;257721;260929;265581;287756;297625;307627	3138;3139;3140;3141;3142;3143	21;57;70;71;86;139
Q9WVJ3-2;Q9WVJ3	Q9WVJ3-2;Q9WVJ3	Carboxypeptidase Q	Cpq	19	19	19	57.9	228950000000	37776000000	37216000000	36970000000	15265000000	12244000000	27248000000	15213000000	14921000000	7168700000	24925000000	37223000000	44552000000	37910000000	29248000000	28999000000	23904000000	19276000000	18930000000	22706000000	21745000000	1758;1821;6439;8676;11572;14653;20407;21103;21168;22014;24781;28515;44394;44395;44467;46293;48451;49231;49398	True;True;True;True;True;True;True;True;True;True;True;True;True;True;True;True;True;True;True	1942;2014;2015;7057;9511;12681;16090;16091;22420;23248;23320;23321;23322;24267;24268;27263;31359;49488;49489;49566;51611;53953;53954;54813;54989;54990	19979;19980;19981;19982;19983;19984;19985;19986;19987;19988;19989;19990;19991;19992;20737;20738;20739;20740;20741;20742;20743;20744;20745;20746;20747;20748;20749;20750;20751;20752;20753;20754;20755;20756;20757;20758;20759;20760;20761;20762;20763;20764;20765;20766;20767;20768;20769;20770;20771;20772;20773;20774;20775;20776;20777;20778;20779;20780;20781;20782;20783;20784;20785;20786;20787;20788;207…	13947;13948;13949;13950;13951;13952;13953;13954;13955;13956;13957;13958;13959;14467;14468;14469;14470;14471;14472;14473;14474;14475;14476;14477;14478;14479;14480;14481;14482;14483;14484;14485;14486;14487;14488;14489;14490;14491;14492;14493;14494;14495;14496;14497;14498;14499;14500;14501;14502;14503;14504;14505;14506;14507;14508;14509;14510;14511;14512;14513;14514;14515;14516;14517;14518;14519;145…	13959;14514;52306;71336;93179;119638;172794;178995;179535;187357;209622;239558;370845;370859;371564;386843;403829;410435;411866	5790;5791;5792;5793;5794;5795;5796;5797	89;120;239;240;256;347;426;429
Q9EPL2	Q9EPL2	Calsyntenin-1;Soluble Alc-alpha;CTF1-alpha	Clstn1	34	34	2	47.2	227260000000	38419000000	33375000000	35579000000	18708000000	10966000000	29990000000	14436000000	14716000000	5222100000	25849000000	38087000000	42036000000	38001000000	37976000000	34362000000	28470000000	21875000000	22591000000	20011000000	25311000000	356;432;2619;3711;4418;7946;9086;9168;10517;11252;11903;14316;15474;16206;16309;17396;18139;18242;19759;20122;20377;21040;21600;25142;33418;33590;34102;34298;35605;43929;44857;49006;49324;49325	True;True;True;True;True;True;True;True;True;True;True;True;True;True;True;True;True;True;True;True;True;True;True;True;True;True;True;True;True;True;True;True;True;True	389;470;2908;2909;4095;4863;8712;9965;10052;11555;12337;13042;15715;16996;16997;17817;17932;19123;19932;20049;21707;22108;22387;23176;23790;27652;37415;37605;38171;38382;39802;48979;49984;54550;54910;54911	3797;3798;3799;3800;3801;3802;3803;3804;3805;3806;3807;3808;3809;3810;3811;3812;3813;3814;3815;3816;3817;3818;3819;3820;4688;4689;4690;4691;30402;30403;30404;30405;30406;30407;30408;30409;30410;30411;30412;30413;30414;30415;30416;30417;30418;30419;30420;30421;30422;30423;30424;30425;30426;30427;30428;30429;30430;30431;30432;30433;30434;30435;30436;30437;30438;30439;30440;30441;42266;42267;42268;4…	2679;2680;2681;2682;2683;2684;2685;2686;2687;2688;2689;2690;2691;2692;2693;2694;2695;2696;2697;3322;21297;21298;21299;21300;21301;21302;21303;21304;21305;21306;21307;21308;21309;21310;21311;21312;21313;21314;21315;21316;21317;21318;21319;21320;29496;29497;29498;29499;29500;29501;29502;29503;29504;29505;29506;29507;29508;29509;29510;29511;29512;29513;29514;29515;29516;29517;29518;29519;29520;35617…	2681;3322;21310;29515;35617;65227;74373;75012;86065;91014;95868;116450;127881;134497;135616;145133;152406;153451;167146;169915;172386;178406;183386;212595;282702;283858;287913;289265;298244;366235;375097;408466;411041;411046	5420;5421	602;765
Q60605;E9QLM0	Q60605;E9QLM0	Myosin light polypeptide 6	Myl6	12	11	1	82.8	224150000000	34196000000	19796000000	32883000000	15785000000	11546000000	37133000000	19957000000	17264000000	8486400000	27108000000	29705000000	23743000000	27127000000	23579000000	31389000000	29315000000	27005000000	20277000000	36021000000	24865000000	2163;4336;4337;7106;7107;8085;8086;18909;20836;30003;37415;45177	False;True;True;True;True;True;True;True;True;True;True;True	2383;4774;4775;7819;7820;8870;8871;20785;22900;22901;33519;33520;33521;41749;41750;50339;50340	24376;24377;24378;24379;24380;24381;24382;24383;24384;24385;24386;24387;24388;24389;24390;24391;49884;49885;49886;49887;49888;49889;49890;49891;49892;49893;49894;49895;49896;49897;81542;81543;81544;81545;81546;81547;81548;81549;81550;81551;81552;81553;81554;81555;81556;81557;81558;81559;81560;81561;81562;81563;81564;81565;81566;81567;81568;81569;81570;92968;92969;92970;92971;92972;92973;92974;929…	17052;17053;17054;17055;17056;17057;17058;17059;17060;17061;17062;17063;17064;17065;17066;34953;34954;34955;34956;34957;34958;34959;34960;34961;34962;34963;34964;57889;57890;57891;57892;57893;57894;57895;57896;57897;57898;57899;57900;57901;57902;57903;57904;57905;57906;57907;57908;57909;57910;57911;57912;57913;57914;57915;57916;57917;57918;57919;57920;66438;66439;66440;66441;66442;66443;66444;664…	17054;34955;34964;57903;57919;66438;66449;160015;176608;253334;312434;377951	3642;3643;3644;3645;3646	36;60;73;120;127
F6RLF6;E9QB01;P13595-2;F7C5W6;E9Q589;F7C5V8;P13595;P13595-3;F7CRA9;P13595-4;F8VQH8	F6RLF6;E9QB01;P13595-2;F7C5W6;E9Q589;F7C5V8;P13595;P13595-3;F7CRA9;P13595-4	Neural cell adhesion molecule 1	Ncam1	27	27	27	46.8	222300000000	39919000000	37563000000	35787000000	15529000000	9421700000	27080000000	17367000000	12203000000	5330100000	22097000000	35286000000	41957000000	35208000000	25979000000	28319000000	23645000000	24456000000	16958000000	20474000000	20976000000	182;1286;1970;4928;6178;6206;8227;9078;12374;12786;15797;16727;18168;18802;20033;21706;22977;23985;26876;30307;30412;33830;38422;38588;38676;41719;44129	True;True;True;True;True;True;True;True;True;True;True;True;True;True;True;True;True;True;True;True;True;True;True;True;True;True;True	195;1411;2176;5413;6779;6808;9021;9022;9023;9955;13555;13999;17343;18403;19961;20666;22007;23926;25295;26398;26399;29590;29591;33958;34072;37873;42854;43030;43120;46493;46494;49195	2054;2055;2056;2057;2058;2059;2060;2061;2062;14352;14353;14354;14355;14356;14357;14358;14359;14360;14361;14362;14363;14364;14365;14366;14367;14368;22413;22414;22415;22416;22417;22418;22419;22420;22421;22422;22423;22424;22425;22426;22427;22428;22429;22430;22431;56468;56469;56470;56471;56472;56473;56474;56475;56476;56477;70732;70733;70734;70735;70736;70737;70738;70739;70740;70741;70742;70743;70744;…	1508;1509;1510;1511;1512;1513;10061;10062;10063;10064;10065;10066;10067;15628;15629;15630;15631;15632;15633;15634;15635;15636;15637;15638;15639;15640;15641;15642;15643;15644;15645;15646;39568;39569;39570;39571;39572;39573;39574;49915;49916;49917;49918;49919;49920;49921;49922;49923;49924;49925;49926;49927;49928;49929;49930;49931;49932;49933;49934;49935;49936;49937;49938;49939;49940;49941;49942;499…	1508;10061;15629;39568;49929;50140;67531;74308;99962;103461;130606;140097;152723;158787;169138;184442;195222;203427;226572;256259;256968;285956;320123;321385;321954;347102;367809	922;923;924;925;926	351;549;556;602;651
Q62523;Q7TQE2;E9Q625	Q62523;Q7TQE2;E9Q625	Zyxin	Zyx	23	23	23	62.2	221860000000	40884000000	27949000000	30558000000	14265000000	9901500000	29390000000	19603000000	15084000000	5738400000	28490000000	38099000000	31119000000	33057000000	28644000000	30132000000	27736000000	31552000000	24722000000	24220000000	30459000000	317;4231;4663;4666;4817;11438;11978;13614;16405;22396;30112;32347;32796;33053;33054;33248;34291;35165;39269;42362;43679;45923;46681	True;True;True;True;True;True;True;True;True;True;True;True;True;True;True;True;True;True;True;True;True;True;True	347;4658;5128;5131;5297;5298;12534;12535;12536;13125;14940;18038;24672;33703;33704;36231;36722;37003;37004;37235;38375;39326;43789;47253;48700;48701;51203;52028	3388;3389;3390;3391;3392;3393;3394;3395;3396;3397;3398;3399;3400;3401;3402;3403;3404;3405;3406;3407;3408;3409;3410;3411;3412;3413;48671;48672;48673;48674;48675;48676;48677;48678;48679;48680;48681;48682;48683;48684;48685;48686;48687;48688;48689;48690;48691;48692;48693;48694;48695;48696;48697;48698;48699;48700;48701;48702;53512;53513;53514;53515;53539;53540;53541;53542;53543;53544;53545;53546;53547…	2366;2367;2368;2369;2370;2371;2372;2373;2374;2375;2376;2377;2378;2379;2380;2381;2382;2383;34103;34104;34105;34106;34107;34108;34109;34110;34111;34112;34113;34114;34115;34116;34117;34118;34119;34120;34121;34122;34123;34124;34125;34126;34127;34128;37433;37434;37435;37436;37453;37454;37455;37456;37457;37458;37459;38751;38752;38753;38754;38755;38756;38757;38758;38759;38760;38761;38762;38763;38764;387…	2369;34111;37433;37453;38759;92268;96512;110522;136466;190724;254492;273810;277639;279599;279646;281180;289219;295154;326448;352845;363964;383754;389700	3917;3918;3919;3920;3921	159;287;359;362;504
Q99K85;Q3U6K9;E9Q6P1	Q99K85;Q3U6K9	Phosphoserine aminotransferase	Psat1	22	22	22	70.8	220880000000	30272000000	28399000000	29755000000	14923000000	8775400000	28627000000	20212000000	20919000000	8610300000	30390000000	28180000000	36614000000	32540000000	24897000000	23331000000	28648000000	28285000000	28819000000	37715000000	28839000000	3404;3834;5284;8369;9942;12565;12571;14286;14287;15808;20271;21045;22415;26765;30643;31436;32022;32023;35400;37165;39516;44907	True;True;True;True;True;True;True;True;True;True;True;True;True;True;True;True;True;True;True;True;True;True	3756;4232;4233;5802;9177;10893;13763;13771;15679;15680;15681;15682;17354;17355;22274;23181;24692;29469;34330;34331;35227;35872;35873;39582;41469;44057;44058;50040	39070;39071;39072;39073;39074;39075;39076;39077;39078;39079;39080;39081;39082;39083;39084;39085;39086;39087;39088;43878;43879;43880;43881;43882;43883;43884;43885;43886;43887;43888;43889;43890;43891;43892;43893;43894;43895;43896;43897;43898;43899;43900;43901;43902;43903;43904;43905;43906;60553;60554;60555;60556;60557;60558;60559;60560;60561;60562;96191;96192;96193;96194;96195;96196;96197;96198;961…	27342;27343;27344;27345;27346;27347;27348;27349;30615;30616;30617;30618;30619;30620;30621;30622;30623;30624;30625;30626;30627;30628;30629;30630;30631;30632;30633;30634;30635;30636;42479;42480;42481;42482;42483;42484;42485;68729;68730;68731;68732;68733;68734;68735;68736;68737;68738;68739;68740;68741;81415;81416;81417;81418;81419;81420;81421;81422;81423;81424;81425;101664;101665;101666;101667;10166…	27349;30620;42481;68740;81424;101669;101742;116200;116228;130685;171361;178440;190924;225646;258725;265827;270779;270794;296862;310470;328174;375475	5005;5006;5007;5008;5009	42;177;277;329;367
O08709;Q6GT24;D3Z0Y2;Q8BG37	O08709;Q6GT24;D3Z0Y2	Peroxiredoxin-6	Prdx6	21	21	21	83.5	218190000000	31609000000	32128000000	29344000000	12628000000	7290300000	34057000000	20697000000	18937000000	7064200000	24435000000	34027000000	38942000000	34112000000	22690000000	19952000000	34207000000	30630000000	26141000000	21686000000	27014000000	5287;5633;6138;6294;12596;14830;16724;22455;23234;25124;26734;27669;30592;32624;33462;33463;47103;47104;47105;47135;47136	True;True;True;True;True;True;True;True;True;True;True;True;True;True;True;True;True;True;True;True;True	5806;6176;6734;6903;6904;13799;16295;16296;18399;18400;24735;24736;25591;27634;29432;30453;34277;36527;37460;37461;52492;52493;52494;52527;52528	60585;60586;60587;60588;64192;64193;64194;64195;64196;64197;64198;64199;64200;64201;64202;64203;70348;70349;70350;70351;70352;70353;70354;70355;70356;70357;72160;72161;72162;72163;72164;72165;72166;72167;72168;72169;72170;72171;72172;72173;72174;72175;72176;72177;72178;72179;72180;72181;72182;72183;72184;72185;72186;72187;72188;72189;72190;72191;72192;72193;72194;72195;72196;72197;72198;72199;722…	42500;42501;45134;45135;45136;45137;45138;45139;45140;45141;45142;49619;49620;49621;49622;49623;51026;51027;51028;51029;51030;51031;51032;51033;51034;51035;51036;51037;51038;51039;51040;51041;51042;51043;51044;51045;51046;51047;51048;51049;51050;51051;51052;51053;51054;51055;51056;51057;51058;51059;101975;101976;101977;101978;101979;101980;101981;101982;101983;101984;101985;101986;101987;101988;1…	42500;45137;49619;51053;101987;122013;140074;191232;197455;212432;225322;233183;258382;276180;282934;282937;393532;393551;393563;393824;393851	1420;1421	116;188
Q8BK62	Q8BK62	Olfactomedin-like protein 3	Olfml3	23	23	23	67.7	218190000000	41348000000	27237000000	34827000000	19378000000	12828000000	26291000000	13016000000	12194000000	5931500000	25141000000	39658000000	34237000000	39036000000	39906000000	29402000000	24627000000	21780000000	18087000000	18322000000	23880000000	270;5225;5628;6986;10325;10838;11276;11432;12482;21223;22975;23252;23726;27373;29661;34733;35859;36223;36630;37095;43110;46863;48284	True;True;True;True;True;True;True;True;True;True;True;True;True;True;True;True;True;True;True;True;True;True;True	292;5740;6171;7690;11352;11900;12362;12528;13671;23378;25293;25611;26120;30130;30131;32954;32955;38852;40072;40461;40895;41392;48082;52223;53772;53773	2927;2928;2929;2930;2931;2932;2933;2934;2935;2936;2937;2938;2939;2940;2941;2942;59959;59960;59961;59962;59963;59964;59965;59966;59967;59968;59969;59970;59971;59972;59973;59974;59975;59976;59977;59978;59979;59980;59981;59982;59983;59984;59985;59986;59987;59988;59989;59990;59991;59992;59993;59994;59995;59996;59997;64179;64180;64181;64182;64183;64184;80209;80210;80211;80212;80213;118866;124005;12400…	2075;2076;2077;2078;2079;2080;2081;2082;2083;2084;2085;2086;2087;42078;42079;42080;42081;42082;42083;42084;42085;42086;42087;42088;42089;42090;42091;42092;42093;42094;42095;42096;42097;42098;42099;42100;42101;42102;45123;45124;45125;45126;45127;45128;56926;56927;84561;88099;88100;88101;88102;88103;88104;88105;88106;88107;88108;88109;88110;88111;88112;88113;88114;88115;91171;91172;91173;91174;9117…	2079;42078;45125;56927;84561;88110;91171;92208;101107;180028;195211;197642;201574;230331;250011;292318;300363;303363;306542;309943;358921;391238;402607	4341;4342;4343	62;131;193
P21550;Q5SX59;Q5SX60;Q5SX61	P21550;Q5SX59	Beta-enolase	Eno3	18	14	12	56.5	214540000000	26505000000	30771000000	29733000000	15214000000	6557900000	29766000000	17496000000	20949000000	7199600000	30344000000	23797000000	30884000000	29321000000	27165000000	21053000000	26767000000	27397000000	30302000000	25558000000	28539000000	424;425;509;3826;5118;12422;13114;16234;18140;19548;19907;23218;23286;36109;37979;40565;41814;47193	False;True;True;True;True;False;True;True;True;True;True;True;False;True;False;True;True;True	462;463;558;4224;5622;13605;14375;14376;17847;19933;21478;21868;25565;25566;25567;25649;25650;40340;42370;45215;46591;52591;52592	4536;4537;4538;4539;4540;4541;4542;4543;4544;4545;4546;4547;4548;4549;4550;4551;4552;4553;4554;4555;4556;4557;4558;4559;4560;4561;4562;4563;4564;4565;4566;4567;4568;4569;4570;4571;4572;4573;4574;4575;4576;4577;4578;4579;4580;4581;4582;4583;4584;4585;4586;4587;4588;4589;4590;4591;4592;4593;4594;4595;4596;4597;4598;4599;4600;5590;5591;5592;5593;5594;5595;5596;5597;5598;5599;5600;5601;5602;5603;4378…	3187;3188;3189;3190;3191;3192;3193;3194;3195;3196;3197;3198;3199;3200;3201;3202;3203;3204;3205;3206;3207;3208;3209;3210;3211;3212;3213;3214;3215;3216;3217;3218;3219;3220;3221;3222;3223;3224;3225;3226;3227;3228;3229;3230;3231;3232;3233;3234;3235;3236;3237;3238;3239;3240;3241;3242;3243;3244;3245;3246;3247;3248;3249;3250;3251;3252;3253;3254;3255;3256;4003;4004;4005;4006;4007;4008;4009;4010;4011;4012…	3212;3253;4012;30552;41102;100319;106182;134766;152456;165247;168139;197249;197928;302497;316623;336304;347805;394336	2076;2171;2172;2173;2174	94;165;169;244;368
Q61171;D3Z4A4	Q61171;D3Z4A4	Peroxiredoxin-2	Prdx2	17	17	17	80.8	214520000000	34839000000	28166000000	30084000000	12771000000	10452000000	31889000000	18209000000	17309000000	6332800000	24473000000	38077000000	35075000000	30854000000	27649000000	32700000000	28411000000	31122000000	25542000000	22071000000	29326000000	9115;15782;22384;22602;24581;24582;28588;28589;28590;30414;32714;33186;34418;37261;38949;49605;49606	True;True;True;True;True;True;True;True;True;True;True;True;True;True;True;True;True	9996;17328;24660;24893;27049;27050;31442;31443;31444;34074;36629;37169;38517;41577;43416;55213;55214	104507;104508;104509;104510;104511;104512;104513;104514;104515;104516;182972;182973;182974;182975;182976;182977;182978;182979;182980;182981;182982;182983;182984;182985;182986;182987;182988;182989;182990;182991;182992;268143;268144;268145;268146;268147;268148;268149;268150;268151;268152;271057;271058;271059;271060;271061;271062;271063;271064;271065;271066;271067;293750;293751;293752;293753;293754;…	74587;74588;74589;74590;74591;74592;74593;74594;74595;74596;130478;130479;130480;130481;130482;130483;130484;130485;130486;130487;130488;130489;130490;130491;130492;130493;130494;130495;130496;130497;130498;130499;190659;190660;190661;190662;190663;190664;190665;190666;190667;192409;192410;192411;192412;192413;192414;207976;207977;207978;207979;207980;207981;207982;207983;207984;207985;207986;207…	74590;130493;190664;192410;208010;208016;240189;240207;240223;256990;276926;280831;290110;311317;324006;413379;413403
A2AVA0;A2AVA0-2	A2AVA0	Sushi, von Willebrand factor type A, EGF and pentraxin domain-containing protein 1	Svep1	94	94	94	42.2	214080000000	37878000000	34838000000	36344000000	17323000000	10010000000	25807000000	14314000000	11330000000	4191400000	22042000000	35960000000	38938000000	37838000000	34529000000	32318000000	25264000000	20860000000	19115000000	21928000000	22237000000	170;1135;1808;1900;2179;2887;4285;4332;4462;4472;4482;4486;4563;4602;4675;4709;4764;4862;6919;7636;7835;8671;9100;9127;9284;9291;9524;9547;9709;10563;11387;11857;12605;13239;13497;14128;15164;16200;16260;17312;17666;17762;18718;18962;21428;21487;22444;23437;24326;24426;25536;26124;27479;27947;30090;30354;30852;32382;32635;32760;33148;33176;33177;33196;33440;34236;34244;34846;35428;35558;35830;359…	True;True;True;True;True;True;True;True;True;True;True;True;True;True;True;True;True;True;True;True;True;True;True;True;True;True;True;True;True;True;True;True;True;True;True;True;True;True;True;True;True;True;True;True;True;True;True;True;True;True;True;True;True;True;True;True;True;True;True;True;True;True;True;True;True;True;True;True;True;True;True;True;True;True;True;True;True;True;True;True…	183;1245;2000;2104;2401;2402;3210;4717;4768;4909;4919;4929;4934;5018;5061;5140;5182;5241;5344;7622;8380;8596;8597;9506;9979;10009;10182;10189;10444;10471;10645;10646;11606;11607;12479;12992;13808;14522;14810;15506;16666;17811;17878;19027;19411;19514;20573;20842;23599;23662;24723;25807;26772;26882;28086;28708;30247;30744;33664;33665;34010;34557;36269;36540;36678;37127;37158;37159;37179;37437;38314…	1897;1898;1899;1900;1901;1902;1903;1904;1905;1906;12730;12731;12732;12733;12734;12735;12736;12737;20612;20613;20614;20615;20616;20617;20618;20619;20620;20621;20622;20623;20624;20625;20626;20627;20628;20629;21764;21765;21766;21767;21768;21769;21770;21771;21772;21773;21774;21775;21776;21777;21778;21779;21780;24557;24558;24559;24560;24561;24562;24563;24564;24565;24566;24567;24568;24569;24570;24571;2…	1381;1382;1383;1384;1385;1386;1387;1388;8868;8869;8870;8871;8872;8873;8874;14376;14377;14378;14379;14380;14381;14382;14383;14384;14385;14386;14387;14388;14389;14390;14391;15182;15183;15184;15185;15186;15187;15188;15189;15190;15191;15192;15193;15194;17191;17192;17193;17194;17195;17196;17197;17198;17199;17200;17201;17202;17203;17204;17205;17206;17207;17208;17209;23378;23379;23380;23381;34605;34606;…	1386;8874;14389;15182;17206;23379;34610;34928;35938;35971;36098;36127;36786;37052;37520;37885;38390;39016;56478;62727;64277;71291;74485;74710;76148;76192;78018;78406;79675;86371;91880;95538;102083;107304;109658;115005;125465;134455;134950;144477;147769;148663;158073;160784;181901;182346;191114;198959;205909;206679;215585;220025;231437;235117;254177;256640;260470;274206;276246;277249;280579;280771…	174;175;176;177;178;179;180	275;802;961;1625;2344;2377;2824
P08003	P08003	Protein disulfide-isomerase A4	Pdia4	36	36	35	57.7	213540000000	23837000000	26741000000	21776000000	12948000000	7893900000	33729000000	23314000000	23367000000	7074100000	32860000000	22514000000	28863000000	22411000000	22666000000	22227000000	30122000000	34121000000	29101000000	34301000000	30384000000	5598;6440;6441;6835;6839;7583;7703;8771;9030;9031;11635;11961;11962;11963;12201;12248;12611;12655;12678;16580;16759;17723;19342;28505;29123;34502;35843;36837;39339;41064;41065;43705;44016;44017;46443;48583	True;True;True;True;True;True;True;True;True;True;True;True;True;True;True;True;True;True;True;True;True;True;True;True;True;True;True;True;True;True;True;True;True;True;True;True	6140;7058;7059;7524;7529;8323;8450;9619;9901;9902;12751;13105;13106;13107;13108;13109;13366;13416;13814;13861;13862;13886;18237;18437;19472;21257;21258;31349;32080;32081;38604;40056;41115;43868;45767;45768;45769;45770;48733;49072;49073;51770;54096;54097	63866;63867;63868;63869;63870;63871;63872;63873;63874;63875;63876;63877;63878;63879;63880;63881;63882;63883;63884;63885;63886;63887;63888;63889;63890;73873;73874;73875;73876;73877;73878;73879;73880;73881;73882;73883;73884;73885;73886;73887;73888;73889;73890;73891;73892;73893;73894;73895;73896;73897;73898;73899;73900;73901;73902;73903;73904;73905;73906;73907;73908;73909;73910;73911;73912;73913;739…	44849;44850;44851;44852;44853;44854;44855;44856;44857;44858;44859;44860;44861;44862;44863;44864;44865;44866;44867;44868;52311;52312;52313;52314;52315;52316;52317;52318;52319;52320;52321;52322;52323;52324;52325;52326;52327;52328;52329;52330;52331;52332;52333;52334;52335;52336;52337;52338;52339;52340;52341;52342;52343;52344;52345;52346;55689;55722;55723;55724;55725;62305;62306;62307;62308;62309;623…	44852;52327;52345;55689;55725;62306;63240;71982;73873;73880;93751;96374;96392;96400;98425;98828;102145;102522;102658;138867;140249;148243;163770;239436;244588;290631;300204;308078;326877;340734;340735;364226;366872;366884;387873;404919	1791;1792;1793;1794;1795;1796	120;272;367;481;533;576
F8WI14	F8WI14		Ecm1	32	32	0	70.4	212340000000	36997000000	30436000000	29406000000	15974000000	11909000000	24590000000	18969000000	15409000000	5979500000	22672000000	37467000000	32801000000	29660000000	29699000000	34622000000	22103000000	26357000000	24136000000	24631000000	24576000000	1416;4151;4313;4771;5342;5343;6124;6940;8242;10423;10757;23092;23093;23612;24186;24457;27506;28727;31243;31860;31970;32792;34147;34309;34317;34373;34639;37512;41434;42545;43779;46968	True;True;True;True;True;True;True;True;True;True;True;True;True;True;True;True;True;True;True;True;True;True;True;True;True;True;True;True;True;True;True;True	1559;4573;4746;5248;5863;5864;6719;7643;9038;9039;11453;11814;25425;25426;25994;26624;26917;30274;31594;31595;34989;35691;35808;36717;38218;38396;38406;38466;38748;41861;46175;47459;48816;52341;52342	15870;15871;15872;15873;15874;15875;15876;15877;15878;15879;15880;15881;15882;15883;15884;15885;15886;15887;15888;15889;47846;47847;47848;47849;47850;47851;47852;47853;47854;49641;49642;49643;49644;49645;49646;49647;49648;49649;49650;49651;49652;49653;49654;49655;49656;49657;49658;49659;54868;54869;54870;54871;54872;54873;54874;54875;54876;54877;54878;54879;54880;54881;54882;54883;54884;61134;611…	11089;11090;11091;11092;11093;11094;11095;11096;11097;11098;11099;11100;11101;11102;11103;11104;11105;11106;11107;11108;33524;33525;33526;33527;33528;33529;33530;33531;34796;34797;34798;34799;34800;34801;34802;34803;34804;34805;34806;34807;34808;34809;34810;34811;38437;38438;38439;38440;38441;38442;38443;38444;38445;42933;42934;42935;42936;42937;42938;42939;42940;42941;42942;42943;42944;42945;429…	11106;33531;34799;38438;42934;42947;49569;56598;67689;85294;87611;196104;196111;200629;204972;206925;231637;241514;263836;269515;270296;277535;288154;289335;289411;289788;291504;313337;344688;354333;364789;392382	455;1187;1188	259;309;440
P68372;Q9D6F9	P68372;Q9D6F9	Tubulin beta-4B chain;Tubulin beta-4A chain	Tubb4b;Tubb4a	29	29	5	82.2	212280000000	22795000000	19165000000	22924000000	7876800000	6029700000	42276000000	22554000000	23400000000	8134500000	37128000000	19499000000	21408000000	22286000000	15002000000	15131000000	37569000000	32036000000	32532000000	23528000000	30578000000	2489;3969;8065;9620;11418;13274;13275;13945;15436;15437;20878;21007;21410;21520;21521;23382;25007;28210;28211;28212;29907;29926;31381;31833;36182;38097;40648;46530;49020	True;True;True;True;True;True;True;True;True;True;True;True;True;True;True;True;True;True;True;True;True;True;True;True;True;True;True;True;True	2740;4377;4378;8846;8847;10552;12513;12514;14560;14561;15307;16957;16958;22971;22972;23139;23580;23702;23703;23704;25748;25749;27511;27512;31038;31039;31040;31041;33366;33367;33396;33397;35148;35149;35660;40416;40417;42500;45311;51867;54565	28489;28490;28491;28492;28493;28494;28495;28496;28497;28498;28499;28500;28501;28502;28503;28504;28505;28506;28507;28508;46129;46130;46131;46132;46133;46134;46135;46136;46137;46138;46139;46140;46141;46142;46143;46144;46145;46146;46147;46148;92610;92611;92612;92613;92614;92615;92616;92617;92618;92619;92620;92621;92622;92623;92624;92625;92626;92627;92628;92629;92630;92631;92632;92633;92634;92635;926…	19984;19985;19986;19987;19988;19989;19990;19991;19992;19993;19994;19995;19996;19997;19998;19999;20000;20001;32420;32421;32422;32423;32424;32425;32426;32427;32428;32429;32430;32431;66176;66177;66178;66179;66180;66181;66182;66183;66184;66185;66186;66187;66188;66189;66190;66191;66192;66193;66194;66195;66196;66197;79133;79134;79135;79136;79137;79138;79139;79140;79141;79142;79143;79144;79145;79146;791…	20000;32426;66181;79146;92084;107591;107609;113591;127619;127635;176983;178132;181624;182555;182566;198605;211269;237056;237079;237080;252451;252616;265201;269088;303038;317492;337238;388481;408576	2941;2942;2943;2944;2945;2946;2947;2948;2949;2950;2951	1;73;147;164;233;257;267;299;330;363;388
P28798;Q3U9N4	P28798;Q3U9N4	Granulins;Acrogranin;Granulin-1;Granulin-2;Granulin-3;Granulin-4;Granulin-5;Granulin-6;Granulin-7	Grn	25	25	25	60.3	212020000000	38470000000	36245000000	36062000000	16488000000	8322100000	23489000000	14902000000	12437000000	3607800000	22000000000	40956000000	38732000000	37976000000	32238000000	27468000000	22346000000	23809000000	19526000000	15820000000	24084000000	3781;4058;4343;4913;7050;7296;7622;14558;16996;17025;17408;17763;21874;26597;26690;26759;34256;35254;37513;42414;44630;44738;44843;47649;47650	True;True;True;True;True;True;True;True;True;True;True;True;True;True;True;True;True;True;True;True;True;True;True;True;True	4173;4472;4781;5398;7759;8017;8364;15982;15983;18697;18726;18727;18728;19135;19515;24111;29286;29385;29463;38337;39423;41862;47311;49738;49857;49969;53077;53078;53079;53080	43167;43168;43169;43170;43171;43172;43173;43174;43175;43176;43177;43178;43179;43180;43181;43182;43183;43184;43185;43186;43187;43188;43189;43190;43191;43192;43193;43194;43195;43196;43197;43198;43199;43200;43201;43202;43203;43204;46828;46829;46830;46831;46832;46833;46834;46835;46836;46837;46838;46839;46840;46841;46842;46843;46844;46845;46846;46847;49939;49940;49941;49942;49943;49944;49945;49946;499…	30111;30112;30113;30114;30115;30116;30117;30118;30119;30120;30121;30122;30123;30124;30125;30126;30127;30128;30129;30130;30131;30132;30133;30134;30135;30136;30137;32854;32855;32856;32857;32858;32859;32860;32861;32862;32863;32864;32865;32866;32867;32868;32869;32870;32871;32872;32873;34981;34982;34983;34984;34985;34986;34987;34988;39445;39446;39447;39448;39449;39450;39451;39452;39453;39454;39455;394…	30116;32867;34982;39445;57362;59481;62594;118768;142326;142516;145222;148665;185883;224366;225023;225600;288855;295801;313349;353163;372922;373960;374992;397869;397880	2317;2318;2319;2320	335;343;420;578
P05202	P05202	Aspartate aminotransferase, mitochondrial	Got2	25	25	25	70.2	211130000000	27263000000	24702000000	26564000000	12872000000	10036000000	30092000000	24838000000	17316000000	10032000000	27414000000	26316000000	29397000000	29516000000	25121000000	28973000000	26901000000	35397000000	27077000000	39296000000	28932000000	3249;5027;9007;9248;11799;13925;17940;19033;19034;20632;21070;21688;22308;29764;29765;31122;31370;33101;33408;33638;35424;40700;42459;44446;44463	True;True;True;True;True;True;True;True;True;True;True;True;True;True;True;True;True;True;True;True;True;True;True;True;True	3591;5523;5524;9876;9877;10141;10142;12928;15286;19715;20920;20921;22668;23210;23907;24581;33138;33139;33140;33141;34855;34856;35133;35134;37053;37405;37662;39607;45368;47360;49544;49562	37444;37445;37446;37447;37448;37449;37450;37451;37452;37453;37454;37455;37456;37457;37458;37459;37460;37461;37462;37463;37464;37465;37466;37467;37468;37469;37470;37471;37472;57642;57643;57644;57645;57646;57647;57648;57649;57650;57651;57652;57653;57654;57655;57656;57657;57658;57659;57660;57661;57662;57663;57664;57665;57666;57667;103294;103295;103296;103297;103298;103299;103300;103301;103302;103303…	26161;26162;26163;26164;26165;26166;26167;26168;26169;26170;26171;26172;26173;26174;26175;26176;26177;40386;40387;40388;40389;40390;40391;40392;40393;40394;40395;40396;40397;73692;73693;73694;73695;73696;73697;73698;73699;73700;73701;73702;75767;75768;75769;75770;75771;75772;75773;75774;75775;75776;75777;75778;75779;75780;75781;75782;75783;75784;75785;75786;75787;75788;75789;75790;75791;75792;757…	26173;40395;73702;75798;95201;113460;150554;161500;161527;174720;178667;184305;190104;251021;251035;262969;265155;280077;282652;284632;296984;337654;353584;371344;371519	1724;1725;1726;1727;1728;1729	60;174;244;281;380;402
P19096	P19096	Fatty acid synthase;[Acyl-carrier-protein] S-acetyltransferase;[Acyl-carrier-protein] S-malonyltransferase;3-oxoacyl-[acyl-carrier-protein] synthase;3-oxoacyl-[acyl-carrier-protein] reductase;3-hydroxyacyl-[acyl-carrier-protein] dehydratase;Enoyl-[acyl-carrier-protein] reductase;Oleoyl-[acyl-carrier-protein] hydrolase	Fasn	105	105	105	59.5	207530000000	28783000000	24302000000	26290000000	13062000000	7704500000	35072000000	18482000000	17442000000	6922700000	29470000000	28030000000	28037000000	27773000000	27700000000	25387000000	30834000000	27451000000	27545000000	29920000000	28767000000	284;533;1400;2189;3151;3757;4512;5038;5074;5187;5673;6133;6876;6964;7564;8020;8318;8630;9112;9302;10127;10682;10785;11380;12093;12143;13306;13848;15237;15326;15327;16105;16159;16522;17136;17251;17553;17675;17802;17959;17960;18837;21022;21023;21668;23720;24267;24816;24857;25661;25935;26717;27335;27430;27606;27734;27885;29252;30038;32124;32818;33184;33705;33733;33735;34083;34181;34297;34937;36708;3…	True;True;True;True;True;True;True;True;True;True;True;True;True;True;True;True;True;True;True;True;True;True;True;True;True;True;True;True;True;True;True;True;True;True;True;True;True;True;True;True;True;True;True;True;True;True;True;True;True;True;True;True;True;True;True;True;True;True;True;True;True;True;True;True;True;True;True;True;True;True;True;True;True;True;True;True;True;True;True;True…	310;311;585;1542;2412;3486;4145;4962;5536;5573;5574;5697;6225;6728;6729;7570;7668;8303;8795;9121;9463;9993;10201;10202;11094;11733;11843;12472;13247;13303;13304;14596;15196;15197;16746;16840;16841;17679;17680;17764;17765;18176;18843;18964;19289;19422;19561;19562;19736;19737;20706;23155;23156;23157;23158;23884;23885;26114;26708;27301;27302;27349;27350;28217;28507;29413;29414;30089;30193;30386;3052…	3073;3074;3075;3076;3077;3078;3079;3080;3081;3082;3083;3084;5885;5886;5887;5888;5889;5890;5891;5892;5893;5894;5895;5896;5897;5898;5899;5900;5901;5902;5903;5904;15678;15679;15680;24652;24653;24654;24655;24656;24657;24658;24659;36169;36170;36171;36172;36173;36174;36175;36176;36177;36178;42855;42856;42857;42858;42859;42860;42861;42862;42863;42864;42865;42866;42867;42868;42869;42870;42871;42872;51917…	2168;2169;2170;2171;2172;2173;2174;4210;4211;4212;4213;4214;4215;4216;4217;4218;4219;4220;4221;4222;4223;4224;4225;10972;10973;17267;17268;17269;17270;25244;25245;25246;29890;29891;29892;29893;29894;29895;29896;29897;29898;29899;29900;29901;29902;29903;29904;29905;29906;36337;36338;36339;36340;36341;36342;36343;36344;36345;36346;36347;36348;36349;40538;40812;40813;40814;40815;40816;40817;40818;40…	2168;4224;10973;17267;25246;29905;36337;40538;40817;41710;45389;49603;56079;56789;62186;65733;68379;70961;74562;76309;82818;87131;87796;91830;97539;97992;107952;112734;125997;126632;126634;133525;134160;138276;143302;144084;146768;147866;149042;150649;150657;159314;178251;178270;184157;201501;205428;209847;210165;216542;218557;225165;230024;230866;232444;233654;234641;245796;253623;272081;277782;…	2116;2117;2118;2119;2120;2121;2122;2123;2124;2125;2126;2127;2128;2129;2130;2131;2132;2133;2134;2135;2136;2137;2138	1;9;32;201;205;453;465;506;511;687;785;1124;1162;1260;1496;1570;1775;1966;1972;2034;2085;2170;2348
P98064-2;P98064	P98064-2;P98064	Mannan-binding lectin serine protease 1;Mannan-binding lectin serine protease 1 heavy chain;Mannan-binding lectin serine protease 1 light chain	Masp1	29	29	29	50.5	207250000000	32434000000	27821000000	32492000000	18140000000	8205800000	25468000000	17858000000	16518000000	4227000000	24086000000	30966000000	32955000000	35098000000	33271000000	30669000000	23893000000	25668000000	25539000000	21819000000	23301000000	165;2351;6838;6925;7177;9382;9383;11331;12589;13727;18051;19684;21944;26937;28860;30243;30244;33530;36829;38880;39249;41354;41983;43935;44164;44962;46657;47421;47707	True;True;True;True;True;True;True;True;True;True;True;True;True;True;True;True;True;True;True;True;True;True;True;True;True;True;True;True;True	177;2588;7527;7528;7628;7895;10294;10295;12418;12419;13792;15062;15063;19838;21623;24189;29656;31735;33892;33893;37537;41107;43345;43767;46088;46781;48985;49233;50104;52001;52837;53139	1848;1849;1850;1851;1852;1853;26793;26794;26795;26796;26797;26798;26799;26800;26801;26802;78580;78581;78582;78583;78584;78585;78586;78587;78588;78589;78590;78591;78592;78593;78594;78595;78596;78597;78598;78599;78600;78601;78602;78603;78604;78605;78606;78607;78608;78609;78610;78611;78612;78613;79666;79667;79668;82332;82333;82334;82335;82336;82337;82338;82339;82340;108031;108032;108033;108034;10803…	1346;1347;1348;18795;18796;18797;18798;18799;18800;18801;55695;55696;55697;55698;55699;55700;55701;55702;55703;55704;55705;55706;55707;55708;55709;55710;55711;55712;55713;55714;55715;55716;55717;55718;55719;55720;55721;56529;58566;58567;58568;58569;77009;77010;77011;77012;77013;77014;77015;77016;77017;77018;77019;77020;77021;77022;77023;77024;77025;77026;77027;77028;77029;77030;77031;77032;77033;…	1346;18798;55707;56529;58568;77011;77046;91513;101913;111474;151526;166432;186661;226984;242231;255637;255654;283446;308026;323645;326275;343617;349149;366280;368189;375999;389462;396124;398245	3163;3164;3165	119;141;347
E9Q5D9	E9Q5D9		Igfbp7	17	17	2	62.6	206770000000	32158000000	30488000000	36608000000	15284000000	9358600000	26708000000	13891000000	13077000000	5082200000	24116000000	34018000000	33064000000	33555000000	31077000000	33224000000	23750000000	22443000000	22064000000	24931000000	27711000000	1218;1865;4978;8394;10675;15334;17027;17904;21899;21900;24589;35669;39655;40955;40956;44337;49203	True;True;True;True;True;True;True;True;True;True;True;True;True;True;True;True;True	1336;2067;5471;9202;11726;16849;18730;19677;24139;24140;27057;39872;44212;45646;45647;49428;54784	13645;13646;13647;13648;13649;13650;13651;13652;13653;13654;13655;13656;13657;13658;13659;13660;13661;13662;13663;13664;21344;57007;57008;57009;57010;57011;57012;57013;57014;57015;57016;96405;96406;96407;96408;96409;96410;96411;96412;96413;96414;96415;96416;96417;96418;96419;122363;177735;177736;177737;177738;177739;177740;177741;177742;177743;199047;199048;209882;209883;209884;209885;209886;2098…	9535;9536;9537;9538;9539;9540;9541;9542;9543;9544;9545;9546;9547;9548;9549;9550;9551;9552;9553;9554;9555;9556;9557;9558;14878;39925;39926;39927;39928;39929;39930;39931;39932;39933;68875;68876;68877;68878;68879;68880;68881;68882;68883;68884;68885;87068;126699;126700;126701;126702;126703;126704;126705;126706;126707;142538;142539;150130;150131;150132;150133;150134;150135;150136;150137;150138;150139;…	9552;14878;39927;68878;87068;126704;142538;150164;186177;186208;208034;298713;329304;339807;339825;370339;410263
Q8BND5-2;Q8BND5;Q8BND5-4	Q8BND5-2;Q8BND5	Sulfhydryl oxidase 1	Qsox1	36	36	3	61.7	202460000000	33618000000	27592000000	35342000000	17593000000	12039000000	24513000000	12227000000	12146000000	4737700000	22655000000	33660000000	37697000000	37469000000	36680000000	33208000000	22660000000	19477000000	18069000000	17480000000	21721000000	731;732;1561;5149;7587;7850;8973;9722;11644;11645;12391;12580;13666;13815;15939;16913;21201;22248;22425;25147;25148;26423;27630;29434;30809;32454;36165;37008;37927;39379;40481;45496;45976;46220;48485;49356	True;True;True;True;True;True;True;True;True;True;True;True;True;True;True;True;True;True;True;True;True;True;True;True;True;True;True;True;True;True;True;True;True;True;True;True	808;809;1719;5654;5655;5656;8327;8612;9838;10660;12763;12764;13572;13781;14996;15158;17496;18603;18604;23355;24519;24520;24702;27657;27658;29089;30410;32579;34510;36344;40399;41301;42310;43914;45119;50687;51262;51537;53989;54944;54945	8073;8074;8075;8076;8077;8078;8079;8080;8081;8082;8083;8084;8085;8086;8087;8088;8089;8090;8091;8092;8093;8094;8095;8096;8097;8098;17716;17717;17718;17719;17720;17721;17722;17723;17724;17725;17726;17727;17728;17729;17730;17731;17732;17733;17734;17735;59073;59074;59075;59076;59077;59078;59079;59080;59081;59082;59083;59084;59085;59086;59087;59088;59089;59090;59091;59092;59093;59094;59095;59096;59097…	5705;5706;5707;5708;5709;5710;5711;5712;5713;5714;5715;5716;5717;5718;5719;5720;5721;5722;12353;12354;12355;12356;12357;12358;12359;12360;12361;12362;12363;12364;12365;12366;12367;12368;12369;12370;12371;12372;41425;41426;41427;41428;41429;41430;41431;41432;41433;41434;41435;41436;41437;41438;41439;41440;41441;41442;41443;41444;41445;41446;41447;41448;41449;41450;41451;41452;41453;41454;41455;414…	5712;5720;12370;41444;62353;64406;73420;79807;93809;93818;100081;101826;110977;112476;131846;141527;179762;189604;190966;212639;212642;222394;232707;247659;260138;274780;302903;309366;316205;327193;335698;380323;384293;386307;404069;411382	4389;4390;4391;4392;4393	304;442;462;467;568
P70296;D3Z1V4;D6RHS6;Q8VIN1-2;E9PYS7;Q8VIN1;E9QLE5	P70296;D3Z1V4;D6RHS6	Phosphatidylethanolamine-binding protein 1;Hippocampal cholinergic neurostimulating peptide	Pebp1	14	14	14	89.3	201320000000	26376000000	22486000000	25212000000	15345000000	6638800000	30540000000	21732000000	21558000000	6576500000	24860000000	26578000000	28216000000	29438000000	29736000000	18962000000	31488000000	33524000000	25714000000	17849000000	24224000000	86;87;11720;13461;16168;28854;28983;28984;33378;43907;45656;45657;49108;49612	True;True;True;True;True;True;True;True;True;True;True;True;True;True	92;93;12845;14769;14770;17776;31729;31865;31866;37374;48956;50862;50863;50864;54681;55220	874;875;876;877;878;879;880;881;882;883;884;885;886;887;888;889;890;891;892;893;894;895;896;897;898;899;900;901;902;903;904;133344;133345;133346;133347;133348;133349;133350;133351;133352;133353;133354;133355;133356;154509;154510;154511;154512;154513;154514;154515;154516;154517;154518;154519;154520;154521;154522;154523;154524;154525;154526;187927;187928;187929;187930;187931;187932;187933;187934;18…	641;642;643;644;645;646;647;648;649;650;651;652;653;654;655;656;657;658;659;660;661;662;663;664;665;666;667;668;94510;94511;94512;94513;94514;94515;94516;94517;94518;94519;94520;109387;109388;109389;109390;109391;109392;109393;109394;109395;109396;109397;134238;134239;134240;134241;134242;134243;134244;134245;134246;134247;134248;134249;134250;134251;134252;134253;134254;134255;134256;134257;1342…	661;668;94518;109392;134249;242194;243175;243218;282494;366084;381471;381523;409310;413466	2995;2996	47;92
Q11011;E9Q039;F6QYF8;E9Q6F4;F6V7K3;F7ANF4;F2Z3V5	Q11011;E9Q039;F6QYF8;E9Q6F4	Puromycin-sensitive aminopeptidase	Npepps	47	47	47	59.9	200010000000	25823000000	28106000000	29683000000	12866000000	6547800000	28391000000	19900000000	18064000000	5802200000	24830000000	25811000000	33410000000	29484000000	26898000000	21601000000	27714000000	25698000000	26245000000	26599000000	24768000000	1067;1158;1347;3000;3579;4983;6656;6929;7270;7666;7896;11174;11947;12037;16123;17992;19373;19401;20680;22798;23820;24794;24945;26515;26644;26645;27861;29625;30220;30221;32049;32450;32594;32798;34370;34755;35641;39424;41600;42508;43467;45318;45639;46933;48090;48091;49249	True;True;True;True;True;True;True;True;True;True;True;True;True;True;True;True;True;True;True;True;True;True;True;True;True;True;True;True;True;True;True;True;True;True;True;True;True;True;True;True;True;True;True;True;True;True;True	1175;1271;1483;3325;3953;5477;7297;7632;7989;7990;8412;8658;12255;13089;13188;17705;17706;17707;19772;19773;21290;21319;22725;22726;22727;25108;26218;27276;27444;29187;29337;29338;30651;32898;32899;33866;33867;35903;36340;36492;36724;38463;38878;38879;39841;43961;46360;47418;47419;48468;48469;50489;50843;52298;53550;53551;54831	12017;12018;12019;12020;12021;12022;12023;12024;12025;12026;12027;12028;12029;12030;12031;12032;12033;12034;12035;12036;12037;12038;12039;12040;12966;12967;12968;12969;12970;12971;12972;12973;12974;12975;12976;12977;15078;15079;15080;15081;15082;15083;15084;15085;15086;15087;15088;15089;15090;15091;34666;34667;34668;34669;34670;34671;34672;34673;34674;34675;34676;34677;34678;34679;34680;34681;346…	8369;8370;8371;8372;8373;8374;8375;8376;8377;8378;8379;8380;8381;8382;8383;8384;8385;9020;9021;9022;9023;9024;9025;9026;9027;9028;10547;10548;10549;10550;10551;10552;10553;10554;10555;10556;10557;24245;24246;24247;24248;24249;24250;24251;24252;24253;28601;28602;28603;28604;28605;28606;28607;39987;39988;39989;39990;39991;39992;39993;39994;39995;39996;53844;53845;53846;53847;53848;53849;53850;53851…	8372;9020;10548;24250;28603;39993;53845;56549;59264;63004;64874;90469;96233;97091;133761;151036;164024;164244;175280;193875;202294;209698;210835;223111;224685;224689;234468;249745;255466;255481;271033;274759;275938;277658;289755;292472;298499;327561;346136;353962;361939;378922;381322;392038;400805;400823;410540	3344;3345;3346;3347;3348;3349;3350;3351;3352	217;448;462;464;502;562;567;598;764
Q91ZX7;Q3U5J2;D3Z5M3;F6UAC8	Q91ZX7	Prolow-density lipoprotein receptor-related protein 1;Low-density lipoprotein receptor-related protein 1 85 kDa subunit;Low-density lipoprotein receptor-related protein 1 515 kDa subunit;Low-density lipoprotein receptor-related protein 1 intracellular domain	Lrp1	110	110	109	32.9	197630000000	29490000000	26543000000	26730000000	14244000000	9978000000	26627000000	18237000000	16252000000	6081200000	23446000000	27131000000	30983000000	28762000000	28975000000	29152000000	26612000000	28004000000	24524000000	26393000000	24553000000	265;456;603;840;1207;1657;1893;2536;2976;3530;4073;4171;4277;4516;4521;4557;4598;4655;4700;4715;4858;5736;5739;6057;8559;10748;11229;11284;11355;11744;12079;12675;14592;15135;15450;15572;16549;16726;16760;17126;17217;17329;17433;17483;17606;18847;19340;19720;19788;20732;21909;21989;22140;22294;22694;23472;23614;26510;27632;27872;28811;28861;29006;29729;30344;30719;31134;31135;31229;32032;32505;32…	True;True;True;True;True;True;True;True;True;True;True;True;True;True;True;True;True;True;True;True;True;True;True;True;True;True;True;True;True;True;True;True;True;True;True;True;True;True;True;True;True;True;True;True;True;True;True;True;True;True;True;True;True;True;True;True;True;True;True;True;True;True;True;True;True;True;True;True;True;True;True;True;True;True;True;True;True;True;True;True…	287;497;498;662;926;1324;1325;1827;2096;2792;3300;3895;3896;4489;4594;4708;4967;4973;5010;5057;5120;5170;5189;5340;6297;6300;6647;9386;11804;12313;12370;12443;12444;12870;13232;13883;16021;16631;16971;16972;17103;18204;18402;18438;18833;18926;19045;19162;19217;19346;20717;21253;21254;21662;21663;21740;22787;24151;24241;24405;24567;24997;25844;25845;25996;29182;30412;30663;31683;31736;31892;33078;…	2884;2885;2886;2887;2888;2889;2890;2891;2892;2893;2894;2895;2896;2897;2898;2899;4902;4903;4904;4905;4906;4907;4908;4909;4910;4911;4912;4913;4914;4915;4916;4917;4918;4919;4920;4921;4922;4923;4924;4925;4926;4927;4928;4929;4930;4931;4932;6535;6536;6537;9483;9484;9485;9486;9487;9488;9489;9490;9491;9492;9493;9494;9495;9496;9497;9498;9499;9500;9501;9502;13540;13541;13542;13543;13544;13545;13546;13547;1…	2058;2059;2060;2061;2062;3487;3488;3489;3490;3491;3492;3493;3494;3495;3496;3497;3498;3499;3500;3501;3502;3503;3504;3505;3506;3507;4671;6629;6630;6631;6632;6633;6634;6635;6636;6637;6638;6639;6640;6641;6642;6643;9463;9464;9465;9466;9467;13198;13199;15134;15135;15136;20322;20323;20324;20325;24096;28193;28194;28195;28196;28197;28198;28199;28200;28201;28202;32991;32992;32993;32994;32995;32996;32997;32…	2060;3493;4671;6636;9464;13199;15136;20324;24096;28194;33003;33655;34540;36377;36411;36752;37031;37401;37796;38005;39000;45999;46025;49119;70287;87533;90855;91216;91648;94651;97422;102639;119062;125218;127712;128703;138471;140096;140254;143210;143822;144566;145776;146335;147191;159365;163733;166791;167304;175668;186288;187162;188450;189977;193124;199136;200676;223064;232724;234544;241975;242238;2…	4893;4894;4895;4896;4897;4898;4899;4900;4901;4902;4903;4904;4905;4906	100;335;553;1470;1796;1873;2187;2234;2329;2360;3906;4000;4032;4404
P15116;D3YYT0;P39038	P15116;D3YYT0	Cadherin-2	Cdh2	39	39	39	45.4	197300000000	31188000000	30845000000	31177000000	14808000000	10723000000	23964000000	15832000000	12670000000	5137800000	20952000000	30701000000	37874000000	32010000000	31861000000	33504000000	22759000000	22290000000	19689000000	22806000000	19826000000	7151;7675;7854;7855;10531;10599;10600;11935;11936;12844;12936;13596;16343;19434;19435;20356;20357;23574;26465;27566;29416;32735;32806;32900;33925;33926;34587;36249;37137;37871;39133;41249;43676;43731;46404;46405;47925;47926;49450	True;True;True;True;True;True;True;True;True;True;True;True;True;True;True;True;True;True;True;True;True;True;True;True;True;True;True;True;True;True;True;True;True;True;True;True;True;True;True	7868;8421;8616;8617;11570;11644;11645;11646;13077;13078;14063;14163;14920;17969;21357;21358;22366;22367;25953;29133;30341;32545;32546;36651;36652;36653;36732;36839;37976;37977;37978;38694;40487;41438;42250;43638;45970;48697;48759;51728;51729;53377;53378;55046	82096;82097;82098;82099;82100;82101;82102;82103;82104;82105;82106;82107;82108;82109;82110;82111;82112;82113;82114;82115;82116;88231;88232;88233;88234;88235;88236;88237;88238;88239;88240;88241;88242;88243;88244;88245;88246;88247;88248;88249;88250;88251;88252;88253;90241;90242;90243;90244;90245;90246;90247;90248;90249;90250;90251;90252;90253;90254;90255;90256;90257;90258;90259;90260;90261;90262;902…	58400;58401;58402;58403;58404;58405;58406;58407;58408;58409;58410;58411;58412;58413;58414;58415;58416;58417;63041;63042;63043;63044;63045;63046;63047;63048;63049;63050;63051;63052;63053;63054;63055;63056;63057;63058;63059;63060;63061;64476;64477;64478;64479;64480;64481;64482;64483;64484;64485;64486;64487;64488;64489;64490;64491;64492;64493;64494;64495;64496;64497;64498;86171;86172;86173;86174;861…	58405;63043;64478;64498;86190;86569;86591;96098;96132;103829;104772;110332;135900;164459;164492;172268;172269;200345;222761;232169;247518;277084;277695;278371;286555;286565;291172;303499;310237;315699;325508;342558;363948;364430;387614;387621;399709;399719;412225	2030;2031;2032;2033;2034	132;287;303;457;515
Q64449;A2AAA9;Q64449-2	Q64449;A2AAA9	C-type mannose receptor 2	Mrc2	49	49	49	48.5	194120000000	29440000000	26876000000	30095000000	9237800000	4535200000	34193000000	18379000000	11336000000	2693200000	27331000000	28355000000	35014000000	32052000000	19604000000	13033000000	32174000000	27834000000	18092000000	11809000000	25459000000	1328;4481;5059;7134;7377;9300;9852;12342;14299;14310;15142;15173;15988;15989;17258;17517;19325;19791;22535;23497;27102;27199;27778;27779;27804;32438;33443;33642;34024;35955;36245;37377;38041;38042;39100;40371;41019;41800;43933;46977;47636;47733;47851;47938;47982;48288;48289;48966;49451	True;True;True;True;True;True;True;True;True;True;True;True;True;True;True;True;True;True;True;True;True;True;True;True;True;True;True;True;True;True;True;True;True;True;True;True;True;True;True;True;True;True;True;True;True;True;True;True;True	1461;4928;5557;7849;8104;10199;10798;10799;13519;15695;15696;15709;16639;16640;16675;16676;17549;17550;18971;19253;21238;21743;24822;25871;29839;29944;29945;30566;30567;30592;36328;37440;37666;38085;40173;40483;41705;42436;42437;43600;44996;45719;46577;48983;52351;53064;53166;53292;53390;53435;53778;53779;54507;55047	14862;14863;14864;14865;14866;14867;14868;14869;14870;14871;14872;14873;14874;14875;14876;14877;14878;14879;14880;51503;51504;51505;51506;51507;51508;51509;51510;51511;51512;51513;51514;51515;51516;51517;58064;58065;58066;58067;58068;58069;58070;58071;58072;81886;84427;84428;84429;84430;84431;84432;84433;84434;84435;84436;84437;84438;84439;84440;84441;84442;84443;84444;106840;106841;106842;106843…	10401;10402;10403;10404;10405;10406;10407;10408;10409;10410;10411;10412;10413;10414;10415;10416;10417;36084;36085;36086;36087;36088;36089;36090;36091;36092;36093;36094;36095;36096;40702;40703;40704;40705;40706;40707;40708;40709;40710;58165;59968;59969;59970;59971;59972;59973;59974;59975;59976;59977;59978;59979;59980;59981;59982;59983;59984;76286;76287;76288;76289;80679;80680;80681;80682;80683;806…	10414;36094;40708;58165;59984;76289;80680;99529;116359;116435;125290;125515;132459;132471;144153;146564;163632;167334;191901;199370;228273;228914;233888;233892;234047;274678;282800;284668;287171;301150;303470;312123;317054;317062;325219;334727;340271;347699;366272;392440;397791;398440;399289;399818;400172;402680;402682;408219;412245	3951;3952;3953;3954;3955	422;450;626;725;1330
Q3U1J4;E9Q4W8;F7ADY1	Q3U1J4;E9Q4W8	DNA damage-binding protein 1	Ddb1	56	56	56	58.2	193170000000	24348000000	23755000000	27099000000	13548000000	9604100000	27060000000	19040000000	17991000000	6198900000	24524000000	25727000000	30565000000	28072000000	28055000000	29399000000	23694000000	26240000000	25054000000	27595000000	23454000000	2528;2569;6526;7006;7292;8281;8803;10284;11190;13085;14298;14401;19236;19237;19329;19619;19753;20049;22124;22908;23932;24029;24408;25532;26874;27316;28400;28833;28857;29861;30762;31004;31944;33108;33416;34220;34397;35107;35158;35732;37483;38962;40226;40227;40451;40889;40984;43045;43046;43186;44067;45002;46916;48830;48926;49074	True;True;True;True;True;True;True;True;True;True;True;True;True;True;True;True;True;True;True;True;True;True;True;True;True;True;True;True;True;True;True;True;True;True;True;True;True;True;True;True;True;True;True;True;True;True;True;True;True;True;True;True;True;True;True;True	2783;2827;7148;7712;7713;8013;9083;9656;9657;11286;12272;14326;15693;15694;15804;15805;21139;21140;21141;21242;21554;21700;22027;24389;25222;26339;26444;26861;26862;28082;29588;30070;31241;31708;31732;33288;33289;33290;34457;34730;35780;37062;37063;37413;38297;38495;39264;39317;39938;41828;43430;44828;44829;44830;45086;45571;45572;45682;48008;48009;48168;49127;50152;52280;54360;54460;54461;54645	28912;28913;28914;28915;28916;28917;28918;28919;28920;28921;28922;29368;29369;29370;29371;29372;29373;29374;29375;29376;29377;29378;29379;29380;29381;29382;29383;29384;29385;29386;29387;29388;74677;74678;74679;74680;74681;74682;74683;74684;74685;74686;74687;74688;74689;74690;74691;74692;74693;74694;74695;74696;80413;80414;80415;80416;80417;80418;80419;80420;80421;80422;80423;80424;80425;80426;804…	20264;20265;20266;20267;20597;20598;20599;20600;20601;20602;20603;20604;20605;20606;20607;20608;20609;20610;20611;20612;20613;52853;52854;52855;52856;52857;52858;52859;52860;52861;52862;52863;52864;52865;52866;52867;52868;52869;57073;57074;57075;57076;57077;57078;57079;57080;57081;57082;57083;57084;57085;57086;57087;57088;57089;57090;59462;59463;59464;67969;72305;72306;72307;72308;72309;72310;723…	20264;20611;52860;57073;59463;67969;72307;84194;90560;105932;116348;117160;162912;162914;163663;165908;167081;169291;188319;194740;203102;203777;206512;215555;226535;229891;238359;242103;242207;251800;259723;262087;270207;280185;282691;288650;289917;294736;295118;299241;313178;324159;333417;333424;335467;339123;340066;358253;358254;359617;367240;376324;391930;407163;407925;409026	3415;3416;3417;3418;3419;3420;3421;3422;3423;3424;3425	64;276;282;291;835;873;910;927;938;1105;1120
Q8C1B7;Q8C1B7-3;Q8C1B7-2;F6RM49;F6QE87;F8VPR4	Q8C1B7;Q8C1B7-3;Q8C1B7-2;F6RM49;F6QE87;F8VPR4	Septin-11	2011-09-01	21	21	12	60.1	192760000000	28284000000	20717000000	24316000000	12906000000	9695300000	27540000000	18987000000	18390000000	6688400000	25232000000	27897000000	24560000000	24757000000	25288000000	27169000000	28367000000	28631000000	28289000000	21186000000	27125000000	51;3775;5313;9780;12297;18977;20090;23938;27412;28068;31299;32542;35474;36512;36826;38578;38663;40021;40076;40406;45912	True;True;True;True;True;True;True;True;True;True;True;True;True;True;True;True;True;True;True;True;True	56;4165;5834;10722;13471;20860;22072;26345;26346;30173;30877;35048;36438;39662;40767;41104;43019;43020;43107;44605;44606;44670;45035;51190;51191	630;631;632;633;634;635;636;637;638;639;640;641;642;643;644;645;646;647;648;649;43105;43106;43107;43108;43109;43110;43111;43112;43113;43114;43115;43116;43117;43118;43119;60903;60904;60905;60906;60907;60908;60909;60910;60911;60912;60913;60914;60915;60916;60917;60918;60919;60920;60921;60922;112601;112602;112603;112604;112605;112606;112607;112608;112609;112610;112611;112612;112613;112614;112615;1126…	460;461;462;463;464;465;466;467;468;469;470;471;472;473;474;475;476;477;478;479;30068;30069;30070;30071;30072;30073;30074;30075;30076;30077;30078;30079;42771;42772;42773;42774;42775;42776;42777;42778;42779;42780;42781;42782;42783;42784;80192;80193;80194;80195;80196;80197;80198;80199;80200;80201;99250;99251;99252;99253;99254;99255;99256;99257;99258;99259;99260;99261;99262;99263;99264;99265;99266;9…	461;30070;42771;80195;99252;161049;169604;203142;230702;235973;264530;275462;297326;305508;307987;321325;321857;331877;332340;335104;383641	217;219;4461;4462	58;169;282;305
P11983;P11983-2;F2Z483	P11983;P11983-2	T-complex protein 1 subunit alpha	Tcp1	32	32	32	78.1	190840000000	21637000000	18138000000	21597000000	13787000000	8843200000	32171000000	18275000000	17960000000	7660500000	30770000000	25694000000	24998000000	24966000000	25628000000	26590000000	31955000000	25337000000	25564000000	30131000000	29460000000	1098;1099;3329;10707;11487;12007;14207;18078;19042;19262;20151;20268;20460;24936;25745;27358;29266;29695;33701;38725;38826;39493;39522;39717;40341;42573;45162;47781;48513;48775;48776;49207	True;True;True;True;True;True;True;True;True;True;True;True;True;True;True;True;True;True;True;True;True;True;True;True;True;True;True;True;True;True;True;True	1207;1208;3673;11758;12589;13157;15590;15591;15592;19868;20929;21170;22140;22269;22270;22481;22482;27435;28306;30115;32304;32305;33015;33016;37733;43176;43284;44033;44034;44066;44067;44278;44964;44965;47489;50324;53217;54018;54302;54303;54788	12347;12348;12349;12350;12351;12352;12353;12354;12355;12356;12357;12358;12359;12360;12361;12362;12363;12364;12365;12366;12367;12368;12369;12370;12371;12372;12373;12374;12375;12376;12377;12378;12379;12380;12381;12382;12383;12384;12385;12386;12387;12388;12389;12390;12391;12392;12393;12394;12395;12396;12397;12398;38165;38166;38167;38168;38169;38170;122656;122657;122658;122659;122660;122661;122662;12…	8610;8611;8612;8613;8614;8615;8616;8617;8618;8619;8620;8621;8622;8623;8624;8625;8626;8627;8628;8629;8630;8631;8632;8633;8634;8635;8636;8637;8638;26635;26636;87256;87257;87258;87259;87260;87261;87262;87263;87264;87265;87266;87267;92580;92581;92582;92583;92584;92585;92586;96815;96816;96817;96818;96819;96820;96821;96822;96823;96824;96825;96826;96827;96828;96829;96830;96831;96832;115467;115468;115469…	8618;8624;26636;87261;92581;96818;115477;151707;161576;163208;170273;171296;173371;210762;217099;230232;245939;250343;285112;322429;323095;327972;328211;329793;334483;354530;377792;398742;404220;406563;406583;410306	1944;1945;1946;1947;1948;1949;1950;1951;1952;1953	1;23;44;171;209;225;295;384;388;430
Q8CG19;Q8CG19-2;Q8CG19-3;B1B1E2;Q8C6S0	Q8CG19;Q8CG19-2;Q8CG19-3;B1B1E2	Latent-transforming growth factor beta-binding protein 1	Ltbp1	52	52	52	40.9	190120000000	33557000000	27452000000	32163000000	17107000000	9301400000	21404000000	13381000000	11317000000	3999900000	20438000000	29927000000	31263000000	29811000000	31478000000	29018000000	19199000000	18625000000	16679000000	21148000000	18832000000	2169;4162;4408;4422;4548;4549;4701;4827;4874;4980;5069;7309;8256;9415;9557;12977;13303;13539;16069;17506;17541;17656;17778;17782;18066;18265;18569;23487;24116;28941;29432;29999;30830;33190;33335;33914;34237;35174;35258;36053;36606;39650;41149;42494;42534;42673;46274;46672;46817;47142;47183;49458	True;True;True;True;True;True;True;True;True;True;True;True;True;True;True;True;True;True;True;True;True;True;True;True;True;True;True;True;True;True;True;True;True;True;True;True;True;True;True;True;True;True;True;True;True;True;True;True;True;True;True;True	2389;2390;4585;4852;4867;5001;5002;5171;5309;5358;5473;5568;8032;9055;10329;10330;10485;14207;14593;14853;17633;19241;19277;19401;19530;19531;19536;19537;19856;20075;20412;25860;25861;26547;31820;32575;32576;33512;33513;34533;37173;37326;37965;38315;39335;39336;39337;39427;40280;40869;44207;45862;47403;47446;47600;51591;51592;52018;52172;52534;52580;52581;55055	24430;24431;24432;24433;24434;24435;24436;24437;24438;24439;24440;24441;24442;24443;24444;24445;24446;24447;24448;24449;24450;24451;24452;24453;24454;24455;24456;24457;24458;24459;24460;24461;24462;24463;24464;24465;24466;47960;47961;47962;47963;47964;47965;47966;47967;47968;47969;50701;50910;50911;50912;50913;50914;50915;50916;50917;50918;50919;52392;52393;52394;52395;52396;52397;52398;52399;524…	17094;17095;17096;17097;17098;17099;17100;17101;17102;17103;17104;17105;17106;17107;17108;17109;17110;17111;17112;17113;17114;17115;17116;17117;17118;17119;17120;17121;17122;33612;33613;33614;35499;35648;35649;35650;35651;35652;35653;35654;36668;36669;36670;36671;36672;36673;36674;36675;36676;36677;36678;36679;36680;36681;36682;36683;37805;37806;37807;37808;37809;37810;37811;37812;37813;37814;388…	17116;33613;35499;35651;36672;36673;37814;38850;39182;39952;40787;59546;67811;77324;78537;104992;107870;109908;133233;146497;146700;147716;148768;148839;151663;153676;156416;199283;204495;242778;247645;253245;260308;280848;281910;286496;288738;295225;295832;301911;306321;329272;341528;353889;354185;355144;386731;389572;390972;393896;394174;412295	4489;4490;4491;4492;4493;4494;4495;4496;4497;4498;4499	400;431;460;601;602;646;682;725;1082;1646;1649
G5E892;Q8VHY0;Q8VHY0-3;Q8VHY0-2	G5E892;Q8VHY0;Q8VHY0-3	Chondroitin sulfate proteoglycan 4	Cspg4	74	74	74	46.7	190110000000	29042000000	30038000000	29858000000	14712000000	8654400000	25470000000	13249000000	13014000000	4843800000	21229000000	28314000000	33049000000	31216000000	29257000000	27334000000	24859000000	20390000000	20881000000	22130000000	20727000000	1592;2831;2850;3084;3725;3732;6282;6372;6525;7125;7150;7735;8451;8667;9822;11441;13764;13767;14177;14336;15240;16081;16189;16215;16607;16625;16637;16891;17038;17348;17384;17817;17994;18922;18923;20253;21887;22281;22282;24028;26209;27557;28082;28221;28740;29408;29409;31209;31847;32945;33716;33717;34130;34145;34979;35997;35999;36021;36667;38082;38852;39166;39344;39539;39581;39622;40057;40468;41344;…	True;True;True;True;True;True;True;True;True;True;True;True;True;True;True;True;True;True;True;True;True;True;True;True;True;True;True;True;True;True;True;True;True;True;True;True;True;True;True;True;True;True;True;True;True;True;True;True;True;True;True;True;True;True;True;True;True;True;True;True;True;True;True;True;True;True;True;True;True;True;True;True;True;True	1752;3148;3169;3412;4110;4117;6890;6988;7146;7147;7839;7840;7867;8485;9264;9502;10765;12539;15103;15106;15558;15735;16749;17645;17798;17826;18267;18268;18290;18302;18577;18741;19069;19110;19578;19775;20799;20800;22248;22249;24127;24554;24555;26443;28801;30332;30891;31051;31609;32529;32530;32531;32532;34950;35677;36887;37751;37752;38201;38216;39127;40219;40221;40244;40936;42484;43313;43314;43673;4…	18098;18099;18100;18101;18102;18103;18104;18105;18106;18107;18108;18109;18110;18111;18112;18113;18114;18115;18116;18117;18118;32528;32529;32530;32531;32532;32533;32534;32535;32536;32537;32538;32539;32540;32541;32542;32771;32772;32773;32774;32775;32776;32777;32778;32779;32780;35534;35535;35536;35537;35538;35539;35540;35541;35542;35543;35544;35545;35546;35547;35548;35549;42411;42412;42413;42414;424…	12618;12619;12620;12621;12622;12623;12624;12625;12626;12627;12628;12629;12630;12631;12632;12633;12634;22692;22693;22694;22695;22696;22697;22698;22699;22700;22701;22702;22703;22704;22885;22886;22887;22888;22889;22890;22891;22892;22893;24813;24814;24815;24816;24817;24818;24819;24820;24821;24822;24823;29601;29602;29603;29604;29605;29606;29607;29664;29665;29666;29667;29668;29669;29670;29671;29672;296…	12627;22694;22892;24813;29603;29664;50844;51767;52847;58062;58398;63442;69351;71270;80513;92288;111905;111932;115316;116572;126009;133308;134386;134563;139084;139277;139337;141345;142626;144721;145017;149148;151051;160118;160130;171061;185997;189875;189883;203750;220559;232127;236068;237176;241608;247348;247363;263599;269414;278706;285217;285222;288078;288142;293874;301506;301523;301668;306800;31…	1344;1345;1346;1347;1348;1349;1350;1351;1352	272;494;564;647;942;1076;1280;1294;2085
Q9JHU4;F6ZX84	Q9JHU4	Cytoplasmic dynein 1 heavy chain 1	Dync1h1	203	203	203	55.4	189980000000	19302000000	17201000000	20699000000	7477400000	4825700000	38188000000	19473000000	19611000000	6337000000	36867000000	18564000000	20336000000	20950000000	17722000000	18608000000	32707000000	29174000000	31347000000	32319000000	31764000000	392;992;993;1610;2144;2335;2671;2935;3368;3500;3683;3789;4179;4944;4975;5602;5957;6170;6171;6356;6418;6622;6662;7184;7297;7711;7908;7909;8145;8159;8859;8926;9081;9182;9255;9334;9625;10354;10759;11087;11346;11608;11693;11733;11734;11820;12527;12545;12593;13021;13150;13208;13232;13418;13766;13816;13989;14755;15486;15654;16118;17176;17471;17477;17487;17831;17955;18336;18918;18993;19087;19870;19880;1…	True;True;True;True;True;True;True;True;True;True;True;True;True;True;True;True;True;True;True;True;True;True;True;True;True;True;True;True;True;True;True;True;True;True;True;True;True;True;True;True;True;True;True;True;True;True;True;True;True;True;True;True;True;True;True;True;True;True;True;True;True;True;True;True;True;True;True;True;True;True;True;True;True;True;True;True;True;True;True;True…	428;1091;1092;1773;2364;2570;2571;2975;2976;3258;3717;3718;3863;4063;4183;4602;5433;5466;5467;6144;6542;6771;6772;6972;7036;7261;7303;7902;8018;8019;8458;8459;8670;8671;8933;8947;9716;9788;9959;9960;10066;10067;10149;10238;10557;11381;11816;12160;12434;12720;12817;12858;12859;12951;13721;13741;13742;13743;13796;14254;14432;14491;14515;14718;14719;15105;15159;15356;16213;17010;17193;17698;18884;19…	4187;4188;4189;4190;4191;4192;4193;4194;4195;11195;11196;11197;11198;11199;11200;11201;11202;11203;11204;11205;11206;11207;18300;18301;18302;18303;18304;18305;18306;18307;18308;18309;18310;18311;18312;18313;18314;18315;18316;18317;18318;18319;18320;18321;18322;18323;24254;24255;24256;24257;24258;24259;24260;24261;24262;26588;26589;26590;26591;26592;26593;26594;26595;26596;26597;26598;26599;26600;…	2946;2947;2948;7805;7806;7807;12753;12754;12755;12756;12757;12758;12759;12760;12761;12762;12763;12764;12765;12766;12767;16966;16967;16968;16969;18628;18629;18630;18631;18632;21609;21610;21611;21612;21613;21614;21615;21616;23808;27052;27053;27054;27055;27056;28023;28024;28025;28026;28027;28028;29295;29296;30240;30241;30242;30243;30244;30245;30246;33692;33693;39701;39702;39703;39704;39705;39900;399…	2946;7805;7806;12753;16969;18630;21612;23808;27055;28023;29295;30242;33692;39702;39901;44881;48266;49887;49890;51605;52113;53604;53891;58592;59483;63291;64947;64956;66912;66984;72739;73101;74359;75111;75872;76520;79192;84805;87625;89737;91603;93450;94331;94590;94595;95328;101438;101550;101955;105314;106625;107097;107251;108813;111928;112480;113965;120912;127965;129402;133667;143563;146283;146302;…	5491;5492;5493;5494;5495;5496;5497;5498;5499;5500;5501;5502;5503;5504;5505;5506;5507;5508;5509;5510;5511;5512;5513;5514;5515;5516;5517;5518;5519	334;503;866;989;1024;1132;1137;1239;1396;1455;1577;1587;1683;1965;2340;2410;2421;2601;2613;3006;3041;3254;3370;3390;3403;3434;3577;4105;4337
O08746	O08746	Matrilin-2	Matn2	39	39	3	46	188980000000	30508000000	28692000000	27681000000	17699000000	12708000000	21993000000	11319000000	12774000000	6793300000	18812000000	33950000000	34871000000	32481000000	32040000000	32497000000	22000000000	17481000000	18531000000	20223000000	21669000000	654;729;1683;2681;2975;4396;4474;4475;4784;4832;6560;8942;9138;9139;12881;15024;15025;16900;17982;18302;20308;21010;21011;30184;31900;32581;33046;33874;34245;34246;35507;35637;36160;37902;38675;39732;43441;44603;44604	True;True;True;True;True;True;True;True;True;True;True;True;True;True;True;True;True;True;True;True;True;True;True;True;True;True;True;True;True;True;True;True;True;True;True;True;True;True;True	724;806;1856;2986;2987;3299;4839;4921;4922;5262;5314;7184;9804;10021;10022;14103;16513;16514;16515;16516;18586;18587;19762;20113;20114;22314;22315;23142;23143;33823;33824;35733;36479;36996;37922;38325;38326;39697;39837;40394;42283;43119;44293;48439;49708;49709	7328;7329;7330;7331;7332;7333;7334;8042;8043;8044;8045;8046;8047;8048;8049;8050;8051;8052;8053;8054;8055;8056;8057;8058;8059;8060;8061;19197;19198;19199;19200;19201;19202;19203;19204;19205;19206;19207;19208;19209;19210;19211;19212;19213;31007;31008;31009;31010;31011;31012;31013;31014;31015;31016;31017;31018;31019;31020;31021;31022;31023;31024;31025;31026;31027;31028;31029;31030;31031;31032;31033;…	5191;5192;5193;5194;5195;5196;5676;5677;5678;5679;5680;5681;5682;5683;5684;5685;5686;5687;5688;5689;5690;5691;5692;5693;5694;5695;5696;5697;13379;13380;13381;13382;13383;13384;13385;13386;13387;13388;13389;13390;13391;13392;13393;13394;13395;13396;13397;21653;21654;21655;21656;21657;21658;21659;21660;21661;21662;21663;21664;21665;21666;21667;21668;21669;21670;21671;21672;21673;24091;24092;24093;2…	5196;5697;13390;21653;24091;35434;36011;36017;38541;38878;53059;73192;74823;74826;104319;124002;124005;141386;150945;154081;171667;178153;178157;255221;269884;275837;279513;286306;288783;288787;297506;298471;302866;315916;321937;329891;361793;372681;372688	1422;1423;1424;1425;1426;1427	40;166;392;733;789;823
P14733	P14733	Lamin-B1	Lmnb1	33	32	29	53.2	188100000000	27277000000	21381000000	20859000000	15319000000	11277000000	25677000000	19579000000	16103000000	6595200000	24028000000	25367000000	23130000000	22687000000	26351000000	35423000000	24425000000	26262000000	26948000000	34394000000	24892000000	842;1446;2553;2554;3265;4753;4754;4967;4968;7108;7141;8718;8749;12640;19712;21250;23161;23162;23250;23395;25688;27135;27424;27805;29914;31406;31819;31946;31947;34448;38610;38637;38638	True;True;True;True;True;True;True;True;True;True;True;True;True;True;True;True;True;True;True;True;False;True;True;True;True;True;True;True;True;True;True;True;True	928;1591;2809;2810;3609;5230;5231;5457;5458;7821;7856;7857;9557;9590;13845;21653;23405;23406;25501;25502;25503;25504;25608;25609;25764;28244;29874;30186;30593;33377;33378;35194;35195;35646;35782;35783;38548;43052;43080;43081	9523;9524;9525;9526;9527;9528;9529;9530;9531;9532;9533;9534;9535;9536;9537;9538;9539;9540;9541;9542;9543;9544;16150;16151;16152;16153;16154;16155;16156;16157;16158;16159;16160;16161;16162;16163;29178;29179;29180;29181;29182;29183;29184;29185;29186;29187;29188;29189;29190;29191;29192;29193;29194;29195;29196;29197;29198;29199;29200;29201;29202;29203;29204;29205;29206;37641;37642;37643;37644;37645;3…	6664;6665;6666;6667;6668;6669;6670;6671;6672;6673;6674;6675;6676;6677;6678;6679;6680;6681;6682;6683;6684;11291;11292;11293;11294;11295;11296;20450;20451;20452;20453;20454;20455;20456;20457;20458;20459;20460;20461;20462;20463;20464;20465;20466;20467;20468;20469;20470;26293;38303;38304;38305;38306;38307;38308;38309;38310;38311;38312;38313;38314;38315;38316;38317;38318;38319;38320;38321;38322;38323;…	6672;11296;20454;20463;26293;38307;38316;39849;39865;57930;58192;71623;71780;102421;166623;180201;196773;196784;197633;198712;216674;228477;230823;234057;252504;265615;268954;270218;270220;290276;321547;321713;321715	2003;2004;2005;2006;2007;2008	212;250;299;328;354;373
Q8R054;B1AVI6	Q8R054;B1AVI6	Sushi repeat-containing protein SRPX2	Srpx2	26	26	26	68.5	187510000000	30495000000	30305000000	30625000000	18700000000	10023000000	21363000000	12049000000	12166000000	3379400000	18405000000	31127000000	34866000000	32989000000	35966000000	29860000000	21550000000	18988000000	16247000000	15188000000	18223000000	4361;4395;4483;4696;7294;10773;15239;16331;18935;19308;21002;21421;21422;25870;25871;29876;35429;35633;40278;40413;46931;47575;47630;47947;47949;49052	True;True;True;True;True;True;True;True;True;True;True;True;True;True;True;True;True;True;True;True;True;True;True;True;True;True	4800;4838;4930;4931;5166;8015;11831;16748;17956;20813;21219;23134;23591;23592;28441;28442;33314;33315;33316;39612;39613;39833;44897;45042;45043;52296;52999;53058;53399;53401;54606;54607	50154;50155;50156;50157;50158;50159;50160;50161;50162;50163;50164;50165;50166;50167;50168;50169;50170;50171;50172;50173;50174;50603;50604;50605;50606;50607;50608;50609;51526;51527;51528;51529;51530;51531;51532;51533;51534;51535;51536;51537;51538;51539;51540;51541;51542;51543;53974;53975;53976;83719;83720;83721;83722;83723;123336;123337;123338;123339;123340;123341;123342;123343;123344;123345;12334…	35113;35114;35115;35116;35117;35118;35119;35120;35121;35122;35123;35124;35125;35126;35127;35128;35129;35130;35131;35132;35430;35431;35432;35433;36100;36101;36102;36103;36104;36105;36106;36107;36108;36109;36110;36111;37776;37777;59469;59470;59471;59472;87710;87711;87712;87713;87714;87715;87716;87717;87718;87719;87720;87721;87722;87723;125999;126000;126001;126002;126003;126004;126005;126006;126007;…	35116;35433;36104;37776;59470;87715;126000;135826;160256;163487;178105;181821;181831;218069;218090;251951;296996;298452;334070;335153;392006;397393;397763;399872;399897;408826	257;258;259;260;261;262	141;324;361;365;420;434
P61979-2;P61979;D3YWG1	P61979-2;P61979;D3YWG1	Heterogeneous nuclear ribonucleoprotein K	Hnrnpk;Gm7964	27	27	2	66.6	186520000000	23893000000	17166000000	21433000000	12878000000	7303300000	28199000000	17048000000	20575000000	5906200000	32121000000	20254000000	19564000000	21031000000	23397000000	24568000000	24685000000	24682000000	27987000000	28071000000	27484000000	3110;6292;10113;10456;15151;15152;16801;16998;17895;19363;19364;20289;20339;20389;20765;24448;24449;25857;29336;31253;31873;35433;36556;36557;39635;40866;47224	True;True;True;True;True;True;True;True;True;True;True;True;True;True;True;True;True;True;True;True;True;True;True;True;True;True;True	3442;6901;11080;11488;16649;16650;16651;16652;18481;18699;19668;21280;21281;22292;22349;22402;22825;26907;26908;28426;32416;32417;35001;35704;35705;39617;40814;40815;40816;44192;45547;52626	35767;35768;35769;72143;72144;72145;72146;72147;72148;72149;72150;72151;72152;72153;72154;72155;116223;116224;116225;116226;116227;116228;116229;116230;116231;116232;120206;120207;120208;120209;120210;120211;120212;120213;120214;120215;175808;175809;175810;175811;175812;175813;175814;175815;175816;175817;175818;175819;175820;175821;175822;175823;175824;175825;175826;175827;175828;175829;175830;17…	24979;51013;51014;51015;51016;51017;51018;51019;51020;51021;51022;82757;82758;85537;85538;85539;125369;125370;125371;125372;125373;125374;125375;125376;125377;125378;125379;125380;125381;125382;125383;125384;125385;125386;125387;125388;125389;125390;125391;125392;125393;125394;125395;125396;140491;140492;140493;140494;140495;140496;140497;140498;142330;142331;142332;142333;142334;142335;142336;14…	24979;51013;82758;85537;125369;125382;140491;142340;150085;163921;163931;171493;172146;172669;175993;206833;206838;217983;246755;263957;269598;297026;305792;305811;329195;339000;394630	562;563;564;565	1;27;42;321
Q5XJF6;P53026;D6RE43;D3YXT2	Q5XJF6;P53026	Ribosomal protein;60S ribosomal protein L10a	Rpl10a	12	12	12	49.8	185670000000	23513000000	22629000000	23413000000	15950000000	10766000000	26214000000	16228000000	18799000000	8607400000	19556000000	22740000000	25608000000	23159000000	26357000000	24788000000	24369000000	21365000000	27941000000	30754000000	22917000000	3795;3796;7526;11545;12877;13312;13663;20594;22925;45165;46677;48230	True;True;True;True;True;True;True;True;True;True;True;True	4189;4190;4191;8265;12650;14098;14603;14604;14993;22628;25239;50327;52024;53706	43396;43397;43398;43399;43400;43401;43402;43403;43404;43405;43406;43407;43408;43409;43410;43411;43412;43413;43414;43415;43416;43417;43418;43419;43420;43421;43422;43423;43424;43425;43426;43427;43428;43429;43430;43431;43432;43433;43434;43435;43436;43437;43438;43439;43440;43441;43442;43443;43444;43445;43446;43447;43448;43449;43450;43451;43452;86633;86634;86635;86636;86637;86638;86639;86640;86641;866…	30273;30274;30275;30276;30277;30278;30279;30280;30281;30282;30283;30284;30285;30286;30287;30288;30289;30290;30291;30292;30293;30294;30295;30296;30297;30298;30299;30300;30301;30302;30303;30304;30305;30306;30307;30308;30309;30310;30311;30312;30313;61871;61872;61873;61874;61875;61876;61877;61878;61879;61880;61881;61882;92923;92924;92925;92926;92927;92928;92929;92930;92931;104235;104236;104237;104238…	30305;30307;61871;92925;104267;108043;110950;174449;194864;377812;389640;401989	3625;3626	85;144
Q91W90;E9PXX7	Q91W90;E9PXX7	Thioredoxin domain-containing protein 5	Txndc5	19	19	19	59	184100000000	24323000000	28070000000	27856000000	14398000000	6723200000	28632000000	15349000000	13414000000	5010000000	20325000000	26646000000	30505000000	28446000000	24813000000	22802000000	27419000000	26007000000	25311000000	21947000000	22061000000	1967;5510;6339;8980;12325;12373;13960;17185;17633;17634;27241;31057;32707;34202;35682;37771;43715;43717;49128	True;True;True;True;True;True;True;True;True;True;True;True;True;True;True;True;True;True;True	2173;6041;6951;9845;13500;13554;15323;18893;19377;19378;29991;34787;36622;38278;39885;42140;48743;48745;54703	22390;22391;22392;22393;22394;22395;22396;22397;22398;22399;62872;62873;62874;62875;62876;62877;62878;62879;62880;62881;62882;62883;62884;62885;62886;62887;62888;62889;72622;72623;72624;72625;72626;72627;72628;72629;72630;72631;72632;72633;72634;72635;72636;72637;72638;72639;72640;72641;72642;72643;72644;72645;72646;72647;72648;72649;103038;103039;103040;103041;103042;103043;103044;103045;103046;…	15616;15617;15618;15619;44134;44135;44136;44137;44138;44139;44140;44141;44142;44143;44144;44145;44146;51380;51381;51382;51383;51384;51385;51386;51387;51388;51389;51390;51391;51392;51393;51394;51395;51396;51397;51398;51399;51400;51401;51402;51403;51404;51405;51406;51407;51408;51409;51410;51411;73500;73501;73502;73503;73504;73505;73506;73507;73508;73509;73510;73511;73512;73513;73514;73515;73516;735…	15619;44134;51399;73512;99394;99948;113680;143622;147399;147402;229249;262363;276900;288524;298799;315045;364292;364328;409468
Q00493	Q00493	Carboxypeptidase E	Cpe	25	25	25	59.9	182210000000	32139000000	21212000000	25115000000	13330000000	10485000000	26351000000	12631000000	13301000000	4468800000	23176000000	30147000000	27159000000	25589000000	22337000000	32302000000	22593000000	19282000000	18012000000	18450000000	19360000000	3911;4257;4258;8205;8738;9118;9965;10010;13300;20129;21953;25521;27246;27247;27934;29732;30658;30659;31797;36419;38140;43594;43595;43596;48749	True;True;True;True;True;True;True;True;True;True;True;True;True;True;True;True;True;True;True;True;True;True;True;True;True	4316;4684;4685;4686;8996;9577;9578;10000;10917;10967;14590;22115;22116;24198;28070;29996;29997;30729;33082;33083;34348;34349;35623;40660;42548;48610;48611;48612;54274;54275	44758;44759;44760;44761;44762;44763;44764;44765;44766;44767;44768;44769;44770;44771;44772;48988;48989;48990;48991;48992;48993;48994;48995;48996;48997;48998;48999;49000;49001;49002;49003;49004;49005;49006;49007;49008;49009;49010;49011;49012;49013;49014;49015;49016;49017;49018;49019;49020;49021;49022;49023;49024;49025;49026;49027;49028;49029;49030;94243;94244;94245;94246;94247;94248;94249;94250;942…	31297;31298;31299;31300;31301;31302;31303;31304;31305;31306;31307;34337;34338;34339;34340;34341;34342;34343;34344;34345;34346;34347;34348;34349;34350;34351;34352;34353;34354;34355;34356;34357;34358;34359;34360;34361;34362;34363;34364;34365;34366;67351;67352;67353;67354;67355;67356;67357;67358;67359;67360;67361;67362;67363;67364;67365;67366;67367;67368;67369;71693;71694;71695;71696;71697;71698;716…	31297;34347;34363;67354;71694;74605;81563;81932;107859;169990;186759;215474;229272;229293;234947;250766;258799;258807;268815;304879;317816;363187;363195;363202;406393	3174;3175;3176;3177;3178;3179	113;154;292;464;469;470
O55234;D3Z2T2	O55234;D3Z2T2	Proteasome subunit beta type-5	Psmb5	15	15	15	60.6	181490000000	26366000000	27494000000	25160000000	14065000000	7273900000	23513000000	17736000000	13621000000	5827500000	20432000000	26272000000	32576000000	26879000000	25601000000	22046000000	23286000000	26601000000	16553000000	22188000000	21108000000	1908;3524;5147;12914;16106;16359;17660;21557;25518;35545;36009;43962;43963;44880;46680	True;True;True;True;True;True;True;True;True;True;True;True;True;True;True	2112;3889;5652;14140;17681;17682;17986;19405;23742;23743;28066;28067;39739;40232;49013;49014;50010;50011;52027	21817;21818;21819;21820;21821;21822;21823;21824;40317;40318;40319;40320;40321;40322;40323;40324;40325;40326;40327;40328;40329;40330;40331;40332;40333;40334;40335;40336;59048;59049;59050;59051;59052;59053;59054;59055;59056;59057;59058;59059;59060;59061;59062;59063;59064;59065;59066;59067;59068;147551;147552;147553;147554;147555;147556;147557;147558;147559;147560;147561;147562;147563;147564;147565;…	15220;15221;28155;28156;28157;28158;28159;28160;28161;28162;28163;28164;28165;28166;28167;28168;28169;28170;41405;41406;41407;41408;41409;41410;41411;41412;41413;41414;41415;41416;41417;41418;41419;41420;41421;41422;41423;104542;104543;104544;104545;104546;104547;104548;104549;104550;104551;104552;104553;104554;104555;104556;104557;104558;104559;104560;104561;104562;104563;104564;104565;104566;10…	15220;28157;41406;104564;133541;136084;147740;182966;215435;297743;301618;366534;366538;375272;389666	1565;1566;1567;1568;1569;1570	104;145;152;156;159;198
Q9R0E2;A8Y5E6;F6WNR1;E9PXE3	Q9R0E2	Procollagen-lysine,2-oxoglutarate 5-dioxygenase 1	Plod1	36	36	35	66.2	181330000000	29686000000	27199000000	27523000000	15815000000	9216200000	20656000000	12820000000	12693000000	4357800000	21364000000	29144000000	30267000000	29008000000	28496000000	30643000000	19215000000	18483000000	18359000000	21110000000	19476000000	911;3006;12280;12905;13060;13952;15499;17476;18804;19819;19841;21272;21358;23756;23900;24364;25855;27175;27324;28051;28283;28803;28931;31064;31368;32033;34940;36798;37271;37566;39586;39587;44503;44708;48731;48814	True;True;True;True;True;True;True;True;True;True;True;True;True;True;True;True;True;True;True;True;True;True;True;True;True;True;True;True;True;True;True;True;True;True;True;True	1004;3332;13452;13453;14129;14298;14299;15315;17023;19208;20668;21773;21798;23431;23432;23524;26151;26152;26304;26811;28424;29916;30078;30860;31119;31675;31810;34794;35130;35884;35885;39083;39084;41076;41589;41918;44141;44142;49603;49823;54256;54343;54344	10312;10313;10314;10315;10316;10317;10318;10319;10320;10321;10322;10323;10324;10325;10326;10327;10328;10329;10330;10331;10332;10333;10334;34771;34772;34773;34774;34775;34776;34777;34778;34779;34780;34781;34782;34783;34784;139870;139871;139872;139873;139874;139875;139876;139877;139878;139879;139880;139881;139882;139883;139884;139885;139886;139887;139888;139889;139890;139891;147457;147458;147459;14…	7217;7218;7219;7220;7221;7222;7223;7224;7225;7226;7227;7228;7229;7230;24332;24333;24334;24335;24336;24337;24338;24339;99117;99118;99119;99120;99121;99122;99123;99124;99125;99126;99127;104475;104476;104477;104478;104479;104480;104481;104482;104483;104484;104485;104486;104487;104488;104489;105682;105683;105684;105685;105686;105687;105688;105689;105690;105691;105692;105693;105694;105695;105696;10569…	7224;24332;99117;104484;105702;113622;128044;146298;158811;167495;167647;180369;181152;201798;202879;206227;217936;228755;229981;235821;237635;241948;242721;262452;265114;270886;293650;307797;311388;313683;328841;328858;371768;373711;406283;406985	5681;5682;5683;5684;5685;5686;5687;5688	224;365;409;482;495;604;624;655
P24527	P24527	Leukotriene A-4 hydrolase	Lta4h	36	36	36	70.9	181090000000	27054000000	24094000000	29480000000	11687000000	6857700000	29114000000	16638000000	10377000000	5069900000	20718000000	24794000000	26778000000	27715000000	24321000000	20721000000	24617000000	24644000000	21638000000	24628000000	20218000000	1776;2854;3407;4818;6278;6661;7629;8608;10174;10175;13681;13773;16934;17934;28273;29085;29862;31639;32473;33191;34292;36496;36903;37252;37852;38188;38945;39660;41095;42010;42052;42441;43145;46089;47669;49482	True;True;True;True;True;True;True;True;True;True;True;True;True;True;True;True;True;True;True;True;True;True;True;True;True;True;True;True;True;True;True;True;True;True;True;True	1963;3174;3759;3760;3761;5299;6886;7302;8372;9437;11142;11143;11144;15013;15112;18627;18628;19709;31109;32021;33291;33292;35457;36363;37174;38376;40744;40745;41185;41566;41567;42227;42598;43412;44217;45802;46812;46861;47342;48124;51390;53099;55080	20167;20168;20169;20170;20171;20172;20173;20174;20175;33018;33019;33020;33021;33022;33023;33024;33025;33026;33027;33028;33029;33030;33031;33032;33033;33034;33035;33036;39102;39103;39104;39105;39106;39107;39108;39109;39110;39111;39112;39113;39114;39115;39116;39117;39118;39119;39120;39121;39122;39123;39124;39125;39126;39127;39128;39129;39130;39131;39132;39133;55330;55331;71932;71933;71934;71935;719…	14062;14063;14064;14065;14066;14067;14068;14069;14070;23112;23113;23114;23115;23116;23117;23118;23119;23120;23121;23122;23123;23124;23125;23126;23127;27357;27358;27359;27360;27361;27362;27363;27364;27365;27366;27367;27368;27369;27370;27371;38771;50822;50823;50824;50825;50826;53872;53873;53874;53875;53876;53877;53878;53879;53880;53881;53882;53883;53884;53885;53886;53887;53888;53889;53890;62684;626…	14064;23120;27370;38771;50823;53889;62693;70689;83114;83125;111073;111971;141776;150435;237572;244288;251811;267452;274863;280863;289246;305360;308615;311269;315580;318270;323979;329329;341116;349391;350090;353418;359336;385231;398017;412442	2209;2210;2211;2212;2213;2214	87;171;241;521;596;602
P07141;F6RNW8;P07141-2;D3Z090;D3YTW1	P07141;F6RNW8	Macrophage colony-stimulating factor 1;Processed macrophage colony-stimulating factor 1	Csf1	13	13	13	34.1	180870000000	29416000000	23673000000	22505000000	13797000000	5817800000	24667000000	19538000000	13670000000	3954500000	23828000000	28388000000	29415000000	22142000000	25724000000	16021000000	21423000000	27009000000	19034000000	18657000000	20187000000	1070;7816;7846;11627;13621;19538;27072;38250;39200;40928;40929;41105;45558	True;True;True;True;True;True;True;True;True;True;True;True;True	1178;1179;8575;8608;12742;12743;14947;21468;29806;42665;43708;45617;45618;45813;50755;50756	12056;12057;12058;12059;12060;12061;12062;12063;12064;12065;12066;12067;12068;12069;12070;12071;12072;12073;12074;12075;12076;12077;12078;12079;12080;12081;12082;12083;12084;12085;12086;12087;12088;12089;12090;12091;12092;12093;12094;12095;12096;12097;12098;12099;12100;89791;89792;89793;89794;89795;89796;89797;89798;89799;89800;89801;89802;89803;89804;89805;89806;89807;89808;90121;90122;90123;901…	8395;8396;8397;8398;8399;8400;8401;8402;8403;8404;8405;8406;8407;8408;8409;8410;8411;8412;8413;8414;8415;8416;8417;8418;8419;8420;8421;8422;8423;8424;8425;8426;8427;64144;64145;64146;64147;64148;64149;64150;64151;64152;64153;64154;64155;64156;64157;64158;64159;64160;64374;64375;64376;64377;64378;64379;64380;64381;64382;64383;64384;64385;93660;93661;93662;93663;93664;93665;93666;93667;93668;93669;…	8422;64147;64376;93669;110571;165209;227965;318753;325911;339411;339413;341222;380763	1770;1771;1772	42;59;97
Q80T06;P57776;Q91VK2;P57776-3;D3YY68;E9QN08;D3YUQ9;D3YZT9	Q80T06;P57776;Q91VK2;P57776-3;D3YY68;E9QN08;D3YUQ9	Elongation factor 1-delta	Eef1d	18	18	2	66.5	179160000000	24601000000	18775000000	21798000000	12269000000	9333300000	27929000000	15676000000	13987000000	6593300000	28201000000	21557000000	21887000000	22558000000	23998000000	29681000000	22797000000	23605000000	28194000000	32504000000	27949000000	3531;3657;12233;13981;17465;21876;22630;27143;27397;28583;33991;35910;38420;38529;39754;39755;44679;44680	True;True;True;True;True;True;True;True;True;True;True;True;True;True;True;True;True;True	3897;3898;4035;13400;15346;15347;19196;24113;24922;29882;30157;31435;38049;40125;40126;42852;42967;44315;44316;44317;49791;49792	40395;40396;40397;40398;40399;40400;40401;40402;40403;40404;40405;40406;40407;40408;40409;40410;40411;40412;40413;40414;40415;40416;40417;40418;41749;41750;41751;41752;41753;41754;41755;41756;41757;41758;139333;139334;139335;139336;139337;139338;139339;139340;139341;139342;139343;139344;139345;139346;139347;139348;139349;139350;139351;139352;160899;160900;160901;160902;160903;160904;160905;160906…	28203;28204;28205;28206;28207;28208;28209;28210;28211;28212;28213;28214;29148;29149;29150;29151;29152;29153;29154;29155;98719;98720;98721;98722;98723;98724;98725;98726;98727;98728;98729;98730;98731;98732;98733;113882;113883;113884;113885;113886;113887;113888;113889;113890;113891;113892;113893;113894;113895;113896;113897;113898;113899;113900;113901;113902;113903;113904;113905;113906;113907;146235;…	28206;29148;98730;113894;146258;185909;192586;228519;230610;240095;286958;300736;320104;320831;330084;330098;373443;373451	1092;1093;1094	29;135;211
Q9D8N0	Q9D8N0	Elongation factor 1-gamma	Eef1g	27	27	27	76.7	177060000000	23270000000	18356000000	24717000000	11492000000	6214300000	26661000000	16654000000	18319000000	7811300000	23566000000	23934000000	27097000000	24525000000	20068000000	19012000000	27227000000	30690000000	25932000000	26759000000	23671000000	47;172;1767;2196;5908;6965;11773;11905;13252;16593;16594;16983;20592;22555;23719;33689;35330;36152;39961;39962;41136;42234;45577;45984;46907;47713;49406	True;True;True;True;True;True;True;True;True;True;True;True;True;True;True;True;True;True;True;True;True;True;True;True;True;True;True	51;52;185;1953;2419;6485;7669;12901;13045;14535;14536;14537;18251;18252;18681;18682;22626;24842;26113;37719;39506;40386;44539;44540;45846;47110;50776;51270;52271;53145;54999	569;570;571;572;573;574;575;576;577;578;579;580;581;582;583;584;585;586;587;588;589;590;591;592;593;594;595;596;597;598;599;600;601;602;603;604;605;606;607;1924;1925;1926;1927;1928;1929;1930;1931;1932;20064;20065;20066;20067;20068;20069;20070;24750;24751;24752;24753;24754;24755;24756;24757;24758;24759;24760;24761;24762;24763;24764;24765;24766;24767;67592;67593;67594;67595;67596;67597;67598;67599;…	410;411;412;413;414;415;416;417;418;419;420;421;422;423;424;425;426;427;428;429;430;431;432;433;434;435;436;437;438;439;1405;1406;1407;1408;1409;1410;1411;1412;1413;14007;14008;17328;17329;17330;17331;17332;17333;17334;17335;17336;17337;47699;47700;47701;47702;47703;47704;47705;47706;56792;56793;56794;56795;56796;56797;56798;56799;56800;56801;56802;56803;56804;56805;56806;56807;56808;56809;56810;…	424;1406;14007;17334;47700;56799;94918;95882;107383;138953;138958;142255;174397;192061;201495;284982;296349;302821;331443;331453;341461;351716;380902;384374;391860;398294;411943	5333;5334;5335;5336	121;263;337;345
Q60715	Q60715	Prolyl 4-hydroxylase subunit alpha-1	P4ha1	26	26	2	65.9	176560000000	23784000000	21096000000	20907000000	11491000000	8600800000	28486000000	16866000000	14735000000	6854900000	23735000000	22999000000	25100000000	23033000000	24320000000	25023000000	28401000000	26590000000	24323000000	27300000000	24376000000	2684;3628;5423;6725;6954;12597;12719;15455;16218;17021;17687;19222;21236;22469;23754;25698;26595;27026;35448;35606;36390;36566;37319;37846;43617;46722	True;True;True;True;True;True;True;True;True;True;True;True;True;True;True;True;True;True;True;True;True;True;True;True;True;True	2990;2991;4006;5946;7371;7658;13800;13928;16977;17829;18722;19434;21124;23391;24750;26149;28254;29284;29754;39632;39803;40630;40825;41639;42221;48633;52071	31050;31051;31052;31053;31054;31055;31056;31057;31058;31059;31060;31061;31062;31063;31064;31065;31066;31067;31068;31069;31070;31071;31072;31073;31074;31075;31076;31077;31078;31079;31080;31081;31082;31083;41464;41465;41466;41467;41468;41469;41470;41471;41472;41473;41474;41475;41476;41477;41478;41479;41480;41481;41482;41483;61965;61966;61967;61968;61969;61970;61971;61972;61973;61974;61975;61976;619…	21685;21686;21687;21688;21689;21690;21691;21692;21693;21694;21695;21696;21697;21698;21699;21700;21701;21702;21703;21704;21705;21706;21707;21708;28958;28959;28960;28961;28962;28963;28964;28965;28966;28967;28968;28969;28970;28971;28972;28973;43477;43478;43479;43480;43481;43482;43483;43484;43485;43486;43487;43488;43489;43490;43491;43492;54444;54445;54446;54447;54448;56678;56679;56680;56681;56682;566…	21704;28961;43486;54445;56684;102024;102991;127740;134630;142480;147937;162838;180121;191291;201777;216717;224349;227539;297122;298261;304636;305897;311634;315522;363445;389992	3653	252
P15864;Q07133	P15864	Histone H1.2	Hist1h1c	9	9	3	38.7	175800000000	27937000000	27443000000	27308000000	17748000000	9982400000	14369000000	15375000000	9440100000	6994800000	19203000000	31688000000	28680000000	29334000000	41458000000	32550000000	13662000000	26006000000	12258000000	24705000000	24372000000	1929;3339;3592;10926;15552;17071;32254;37532;38167	True;True;True;True;True;True;True;True;True	2134;3686;3968;11992;17080;18775;36130;41883;42576	22022;22023;22024;22025;22026;22027;22028;22029;22030;22031;22032;38325;38326;38327;38328;38329;38330;38331;38332;38333;38334;38335;41078;124961;124962;124963;124964;124965;124966;124967;124968;124969;124970;124971;124972;124973;124974;124975;124976;124977;124978;124979;180218;180219;180220;180221;180222;180223;180224;180225;180226;180227;180228;199456;199457;199458;199459;199460;199461;199462;19…	15332;15333;15334;15335;15336;15337;15338;15339;15340;15341;15342;26755;26756;26757;26758;26759;26760;26761;26762;26763;26764;26765;26766;26767;26768;26769;26770;26771;26772;26773;28686;88655;88656;88657;88658;88659;88660;88661;88662;88663;88664;88665;88666;88667;128427;128428;128429;128430;128431;128432;128433;142836;142837;142838;142839;142840;142841;273187;273188;273189;273190;273191;313451;31…	15338;26761;28686;88665;128427;142836;273187;313451;318100
P17751	P17751	Triosephosphate isomerase	Tpi1	17	17	17	67.6	173810000000	22194000000	21919000000	21483000000	8855700000	5134500000	26389000000	18135000000	17260000000	4396700000	28043000000	21972000000	24590000000	21547000000	18361000000	13953000000	24640000000	28566000000	26784000000	17287000000	27858000000	4573;6425;6426;9710;9711;12411;18878;19224;20411;32462;36101;39189;40645;46589;46952;47131;47209	True;True;True;True;True;True;True;True;True;True;True;True;True;True;True;True;True	5030;7043;7044;10647;10648;13593;20750;21127;22424;36352;40332;43696;45308;51930;52322;52323;52523;52610	52628;52629;52630;73716;73717;73718;73719;73720;73721;73722;73723;73724;73725;73726;73727;73728;73729;73730;73731;73732;73733;73734;73735;73736;73737;73738;73739;73740;73741;73742;73743;73744;111853;111854;111855;111856;111857;111858;111859;111860;111861;111862;111863;111864;111865;111866;111867;111868;111869;111870;111871;111872;111873;111874;111875;111876;111877;111878;111879;111880;111881;1118…	36838;52187;52188;52189;52190;52191;52192;52193;52194;52195;52196;52197;52198;52199;52200;52201;52202;52203;52204;52205;52206;52207;52208;52209;52210;52211;52212;52213;52214;79681;79682;79683;79684;79685;79686;79687;79688;79689;79690;79691;79692;79693;79694;79695;79696;79697;79698;79699;79700;79701;79702;79703;79704;79705;79706;79707;100250;100251;100252;100253;100254;100255;100256;100257;100258;…	36838;52205;52213;79681;79690;100266;159598;162859;172841;274819;302438;325830;337209;388931;392215;393775;394528	2098	133
P97873;Q4QQJ7	P97873	Lysyl oxidase homolog 1	Loxl1	24	24	7	57.2	171410000000	24919000000	24482000000	22745000000	14728000000	10860000000	19434000000	15396000000	15003000000	3691600000	20156000000	25957000000	27265000000	26079000000	29556000000	33556000000	19484000000	22276000000	22164000000	21297000000	19862000000	1598;3308;3842;4544;4652;11398;14135;15918;18020;18547;24949;27870;31650;33738;34563;36676;39681;43185;45270;45421;45458;48803;49383;49594	True;True;True;True;True;True;True;True;True;True;True;True;True;True;True;True;True;True;True;True;True;True;True;True	1759;3652;4242;4997;5117;12491;12492;15514;15515;17474;19802;20388;27448;30661;35469;37774;38668;40947;44240;48167;50440;50605;50644;54331;54973;55202	18184;18185;18186;18187;18188;18189;18190;18191;18192;37959;37960;37961;37962;37963;37964;37965;37966;37967;37968;37969;37970;37971;37972;37973;37974;37975;37976;37977;37978;37979;37980;37981;37982;43998;43999;44000;44001;44002;44003;44004;44005;44006;44007;44008;52333;52334;52335;52336;52337;52338;52339;52340;52341;52342;52343;52344;52345;52346;52347;52348;52349;52350;52351;52352;52353;53437;534…	12669;12670;12671;12672;12673;12674;12675;26486;26487;26488;26489;26490;26491;26492;26493;26494;26495;26496;26497;26498;26499;26500;26501;26502;26503;26504;26505;26506;26507;30694;30695;30696;30697;30698;30699;30700;30701;30702;30703;30704;30705;30706;30707;30708;30709;30710;30711;30712;30713;36618;36619;36620;36621;36622;36623;36624;36625;36626;36627;36628;36629;36630;36631;36632;36633;36634;366…	12673;26495;30702;36632;37391;91961;115073;131470;151271;156238;210871;234532;267507;285344;291004;306879;329496;359603;378581;379772;380022;406812;411752;413303	590;591	139;213
Q9Z2U1;D3YX79	Q9Z2U1;D3YX79	Proteasome subunit alpha type-5;Proteasome subunit alpha type	Psma5;Gm8394	12	12	12	68.5	171100000000	25948000000	23120000000	24721000000	12984000000	7717100000	23103000000	13697000000	13363000000	5305200000	21139000000	22928000000	27546000000	24890000000	19513000000	23600000000	19455000000	18805000000	17941000000	18794000000	17469000000	1732;8715;16494;17370;21878;21964;24473;24894;26412;32496;36190;39781	True;True;True;True;True;True;True;True;True;True;True;True	1910;9553;18145;18146;19095;24116;24117;24211;24212;26933;27392;29076;29077;36388;40425;40426;44345	19709;19710;19711;19712;19713;19714;19715;19716;19717;19718;19719;19720;19721;19722;19723;19724;19725;19726;19727;19728;19729;19730;19731;19732;100276;100277;100278;100279;100280;100281;100282;100283;100284;100285;100286;100287;100288;100289;100290;100291;192753;192754;192755;192756;192757;192758;192759;192760;192761;192762;192763;192764;192765;192766;192767;192768;192769;192770;192771;192772;192…	13763;13764;13765;13766;13767;13768;13769;13770;13771;13772;13773;13774;13775;13776;13777;13778;13779;13780;13781;13782;13783;71596;71597;71598;71599;71600;71601;71602;71603;71604;71605;71606;71607;71608;71609;137942;137943;137944;137945;137946;137947;137948;137949;137950;137951;137952;137953;137954;137955;137956;137957;137958;137959;137960;137961;137962;137963;137964;137965;137966;137967;137968;…	13763;71596;137951;144902;185936;186842;207033;210413;222279;275141;303140;330267	5874;5875;5876;5877	59;78;156;228
Q99K41;E9Q9L8	Q99K41;E9Q9L8	EMILIN-1	Emilin1	42	42	42	53.7	169440000000	29189000000	25869000000	25645000000	15443000000	9517200000	21154000000	9837900000	10654000000	4643500000	17489000000	29661000000	31108000000	26991000000	29650000000	31107000000	19231000000	15002000000	17373000000	20406000000	17573000000	1425;3340;3809;4778;4779;5821;7359;13465;14386;15747;16821;17341;17653;17654;18856;23032;23784;23804;24717;24871;25791;27186;27245;27265;29121;29175;32162;32742;34649;34995;35007;36028;36269;36634;36635;37680;40703;43377;45451;45850;46697;48942	True;True;True;True;True;True;True;True;True;True;True;True;True;True;True;True;True;True;True;True;True;True;True;True;True;True;True;True;True;True;True;True;True;True;True;True;True;True;True;True;True;True	1568;3687;4206;5256;5257;6393;8083;14774;15789;17290;18504;19059;19060;19398;19399;20728;25355;26180;26201;27196;27367;28352;29928;29995;30018;32076;32077;32163;32164;36027;36660;38760;39146;39158;39159;40252;40508;40899;40900;42045;45371;48368;50637;51121;52044;54479	15952;15953;15954;15955;15956;15957;15958;15959;15960;15961;15962;15963;15964;15965;15966;15967;15968;15969;15970;15971;15972;15973;15974;15975;38336;38337;38338;38339;38340;38341;38342;38343;38344;38345;38346;38347;38348;38349;38350;38351;38352;38353;38354;43569;43570;43571;43572;43573;43574;43575;43576;43577;43578;54973;54974;54975;54976;54977;54978;54979;54980;54981;54982;54983;54984;54985;549…	11161;11162;11163;11164;11165;11166;11167;11168;11169;11170;11171;11172;11173;11174;11175;11176;11177;11178;11179;11180;11181;11182;11183;11184;11185;11186;26774;26775;26776;26777;26778;26779;26780;26781;26782;26783;26784;26785;26786;26787;26788;26789;30394;30395;30396;30397;30398;30399;30400;30401;38512;38513;38514;38515;38516;38517;38518;38519;38520;38521;38522;38523;46865;46866;46867;46868;468…	11184;26782;30394;38514;38520;46865;59824;109408;117029;130126;140809;144649;147704;147706;159457;195618;201957;202151;209230;210243;217420;228828;229265;229504;244568;245161;272243;277107;291590;293992;294075;301732;303702;306580;306599;314508;337683;361180;379955;383168;389817;408033	5000;5001;5002;5003	204;346;465;547
Q9Z2W0;Q8BPW9	Q9Z2W0;Q8BPW9	Aspartyl aminopeptidase	Dnpep	21	21	21	72.9	167140000000	24147000000	24106000000	22535000000	10433000000	7049700000	26179000000	15870000000	11472000000	4553500000	20797000000	20742000000	25706000000	20924000000	18646000000	22230000000	24214000000	21794000000	16162000000	17607000000	17660000000	8141;11163;11199;11389;14943;17129;17854;21101;23693;26045;27922;28432;30134;30474;30976;31830;37856;39380;39576;45187;48169	True;True;True;True;True;True;True;True;True;True;True;True;True;True;True;True;True;True;True;True;True	8929;12243;12281;12481;12482;16421;18836;19620;23246;26083;28625;30717;31274;33737;33738;34141;34699;35657;42233;42234;42235;43915;44129;50351;50352;53636;53637	93563;93564;93565;93566;93567;93568;93569;93570;93571;93572;127445;127446;127447;127448;127449;127450;127451;127452;127453;127454;127455;127456;127457;127458;127459;127460;127461;127462;127463;127464;127858;127859;127860;127861;127862;127863;127864;129661;129662;129663;129664;129665;129666;129667;129668;129669;129670;129671;129672;129673;129674;129675;129676;129677;129678;129679;129680;129681;129…	66896;66897;90354;90355;90356;90357;90358;90359;90360;90361;90362;90363;90364;90365;90366;90367;90368;90369;90370;90371;90372;90373;90374;90645;90646;90647;91886;91887;91888;91889;91890;91891;91892;91893;91894;91895;91896;91897;91898;91899;91900;91901;91902;91903;91904;91905;91906;91907;91908;91909;91910;91911;91912;91913;91914;91915;91916;91917;91918;91919;91920;91921;91922;91923;91924;91925;123…	66896;90367;90646;91919;123157;143245;149608;178975;201287;219418;234858;238583;254724;257381;261848;269055;315642;327213;328750;378058;401488	5878;5879;5880;5881;5882;5883	292;340;345;388;404;437
P14152;B1ATQ3	P14152	Malate dehydrogenase, cytoplasmic	Mdh1	15	15	15	60.2	167020000000	20679000000	18651000000	22830000000	10221000000	6550400000	25457000000	15886000000	17762000000	5610700000	23372000000	24358000000	27906000000	26459000000	18220000000	17652000000	27667000000	23982000000	21971000000	19414000000	25655000000	1647;6249;6343;10356;11172;11503;13836;14663;24941;27801;32040;37683;39488;45082;45712	True;True;True;True;True;True;True;True;True;True;True;True;True;True;True	1817;6856;6957;6958;11383;12253;12605;15181;16102;27440;30589;35893;42049;44028;50239;50926	18824;18825;18826;18827;18828;18829;18830;18831;18832;18833;18834;18835;18836;71573;71574;71575;71576;71577;71578;71579;71580;71581;71582;71583;71584;72705;72706;72707;72708;72709;72710;72711;72712;72713;72714;72715;72716;72717;72718;72719;72720;72721;72722;72723;72724;72725;72726;72727;72728;72729;72730;72731;72732;72733;72734;72735;72736;72737;72738;72739;72740;72741;72742;72743;72744;72745;727…	13104;13105;13106;13107;13108;50594;50595;50596;50597;50598;50599;50600;51440;51441;51442;51443;51444;51445;51446;51447;51448;51449;51450;51451;51452;51453;51454;51455;51456;51457;51458;51459;51460;51461;51462;51463;51464;51465;51466;51467;51468;51469;51470;51471;51472;51473;51474;51475;51476;51477;51478;51479;51480;51481;51482;51483;51484;51485;51486;84815;84816;84817;84818;84819;84820;84821;848…	13108;50598;51473;84815;90452;92675;112604;119727;210818;234033;270987;314521;327936;377088;381955	1990	90
P68254;P68254-2;F6YY69;F6VW30	P68254;P68254-2;F6YY69;F6VW30	14-3-3 protein theta	Ywhaq	14	10	10	53.5	166440000000	23613000000	20878000000	23936000000	12777000000	6176800000	24970000000	14487000000	12090000000	4535400000	22976000000	23270000000	24358000000	24884000000	25331000000	20649000000	22831000000	23923000000	20885000000	23025000000	22101000000	4077;7441;10304;23066;23070;31213;35207;35208;38278;40536;48240;48825;48826;48909	True;False;False;False;True;False;True;True;True;True;True;True;True;True	4494;8174;8175;11316;11317;25391;25398;25399;34954;39373;39374;42696;45182;53722;53723;54355;54356;54442	47099;47100;47101;47102;47103;47104;47105;47106;47107;47108;47109;47110;47111;47112;47113;85426;85427;85428;85429;85430;85431;85432;85433;85434;85435;85436;85437;85438;85439;85440;85441;85442;85443;85444;85445;85446;85447;85448;85449;85450;85451;85452;85453;85454;85455;85456;85457;85458;85459;85460;85461;85462;85463;85464;85465;85466;85467;85468;85469;85470;85471;85472;85473;85474;85475;85476;854…	33050;33051;33052;33053;33054;33055;33056;33057;33058;33059;33060;60796;60797;60798;60799;60800;60801;60802;60803;60804;60805;60806;60807;60808;60809;60810;60811;60812;60813;60814;60815;60816;60817;60818;60819;60820;60821;60822;60823;60824;60825;60826;60827;60828;60829;60830;60831;60832;60833;60834;60835;60836;60837;60838;60839;60840;60841;60842;60843;60844;60845;60846;60847;60848;60849;60850;608…	33056;60803;84340;195787;195846;263636;295460;295474;318958;336069;402138;407117;407123;407730	1060;1061;1062;1063	22;26;160;218
O08553;E9Q756	O08553	Dihydropyrimidinase-related protein 2	Dpysl2	31	28	27	74.5	166020000000	20728000000	19462000000	19242000000	9997300000	6857000000	24456000000	19175000000	16153000000	6660300000	23291000000	21013000000	21942000000	21681000000	20581000000	19334000000	23179000000	24381000000	25616000000	27301000000	26027000000	208;209;5940;6059;6844;7214;13387;13392;15580;16085;16932;17199;20484;21695;22039;22055;22704;29148;29985;30088;31159;31160;32532;34349;37130;37334;38455;41431;41490;43099;44351	True;True;True;True;True;True;True;True;True;True;True;True;True;True;True;False;True;False;False;True;True;True;True;True;True;True;True;True;True;True;True	225;226;227;228;6522;6523;6649;7534;7932;14683;14689;14690;14691;17111;17112;17649;18625;18907;22510;23915;24294;24312;24313;25007;32119;32120;33490;33491;33660;33661;34894;34895;36427;38441;41430;41657;42891;46171;46172;46238;48071;49444	2358;2359;2360;2361;2362;2363;2364;2365;2366;2367;2368;2369;2370;2371;2372;2373;2374;2375;2376;2377;2378;2379;2380;2381;2382;68027;68028;68029;68030;68031;68032;68033;68034;68035;68036;68037;68038;68039;68040;68041;68042;68043;68044;68045;68046;68047;68048;68049;68050;68051;68052;68053;68054;68055;68056;68057;68058;68059;68060;68061;68062;68063;68064;68065;68066;68067;68068;68069;69610;69611;6961…	1697;1698;1699;1700;1701;1702;1703;1704;1705;1706;1707;1708;1709;1710;1711;48001;48002;48003;48004;48005;48006;48007;48008;48009;48010;48011;48012;48013;48014;48015;48016;48017;48018;48019;48020;48021;48022;48023;48024;48025;48026;48027;48028;48029;48030;48031;48032;48033;48034;49126;49127;49128;49129;49130;49131;49132;49133;49134;49135;49136;49137;49138;49139;49140;49141;49142;49143;49144;49145;…	1708;1710;48018;49150;55768;58892;108532;108579;128757;133331;141773;143690;173638;184392;187608;187740;193186;244857;253108;254125;263183;263198;275383;289600;310178;311794;320382;344644;345225;358899;370459	578;580;583;1403;1404;1405;1406;1407;1408;1409	37;64;78;83;103;152;168;362;375;437
Q99L47;F8WJK8;E9Q1V0;E9Q1X9	Q99L47;F8WJK8	Hsc70-interacting protein	St13	12	12	12	31.8	165640000000	24270000000	18460000000	19455000000	11192000000	7629700000	23578000000	15543000000	14327000000	7298700000	23883000000	20453000000	19975000000	18351000000	17279000000	22487000000	20231000000	27325000000	21065000000	26645000000	23288000000	1675;1689;11739;13017;14061;23142;23810;25796;33870;35601;42752;45799	True;True;True;True;True;True;True;True;True;True;True;True	1847;1863;12864;12865;14250;15431;25479;26207;26208;28357;37917;37918;39797;47684;51045;51046	19125;19126;19127;19128;19129;19130;19131;19132;19133;19134;19135;19136;19255;19256;19257;19258;19259;19260;19261;19262;19263;19264;19265;19266;19267;19268;19269;19270;19271;19272;19273;19274;19275;133496;133497;133498;133499;133500;133501;133502;133503;133504;133505;133506;133507;133508;133509;133510;133511;133512;133513;133514;133515;133516;133517;133518;133519;133520;148608;148609;148610;14861…	13321;13322;13323;13324;13325;13326;13327;13328;13329;13330;13331;13332;13333;13334;13335;13336;13337;13338;13339;13417;13418;13419;13420;13421;13422;13423;13424;13425;13426;13427;13428;13429;13430;13431;94610;94611;94612;94613;94614;94615;94616;94617;94618;94619;94620;94621;94622;94623;94624;94625;94626;105273;105274;105275;105276;105277;105278;105279;105280;105281;105282;105283;105284;114407;11…	13327;13430;94611;105274;114425;196475;202187;217481;286265;298220;355650;382712	5043;5044;5045;5046	28;38;219;357
P14206;D3YTT7	P14206;D3YTT7	40S ribosomal protein SA	Rpsa;Rpsa-ps10	13	13	13	56.6	165560000000	20539000000	16323000000	18273000000	11647000000	7874200000	24387000000	16382000000	18385000000	7917300000	23829000000	19075000000	21412000000	21358000000	23381000000	24162000000	24494000000	24768000000	28179000000	27350000000	25511000000	611;1875;8793;9367;11851;12801;13758;13759;22836;26265;37433;37929;49531	True;True;True;True;True;True;True;True;True;True;True;True;True	671;2077;9646;10276;10277;12986;14017;14018;15096;15097;25148;28857;41769;42312;42313;55136	6618;6619;6620;6621;6622;6623;6624;6625;6626;6627;6628;6629;6630;6631;6632;6633;6634;6635;6636;6637;6638;6639;6640;6641;21488;21489;21490;21491;21492;21493;21494;21495;21496;21497;21498;21499;21500;21501;21502;21503;21504;21505;21506;21507;101246;101247;101248;101249;101250;101251;107778;107779;107780;107781;107782;107783;107784;107785;107786;107787;107788;107789;107790;107791;107792;107793;10779…	4722;4723;4724;4725;4726;4727;4728;4729;4730;4731;4732;4733;4734;4735;4736;4737;4738;4739;4740;4741;4742;14996;14997;14998;14999;15000;15001;15002;15003;15004;15005;15006;15007;15008;15009;15010;15011;15012;15013;15014;15015;15016;15017;72246;72247;76849;76850;76851;76852;76853;76854;76855;76856;76857;76858;76859;76860;76861;76862;76863;76864;76865;76866;76867;76868;76869;76870;76871;76872;95496;…	4737;14997;72247;76871;95497;103534;111826;111844;194171;220873;312579;316241;412915	1991;1992;1993	10;34;198
P51859;E0CXA0;E0CYW7	P51859;E0CXA0	Hepatoma-derived growth factor	Hdgf	16	16	15	62.9	164090000000	25561000000	23029000000	26537000000	8930600000	7202500000	21241000000	17150000000	11445000000	4854500000	18140000000	26048000000	25313000000	26603000000	21324000000	18343000000	22640000000	26910000000	16265000000	15609000000	19141000000	1267;3352;4431;6417;8567;9388;15080;17631;19362;28439;35528;35529;36768;37325;37326;49289	True;True;True;True;True;True;True;True;True;True;True;True;True;True;True;True	1391;3700;4876;7035;9394;10300;16575;19375;21278;21279;31281;39721;39722;41044;41648;41649;54873	14169;14170;14171;14172;14173;38468;38469;38470;38471;51001;51002;73610;73611;73612;73613;73614;73615;73616;73617;73618;73619;73620;98524;98525;98526;98527;98528;98529;98530;98531;98532;98533;98534;98535;98536;98537;98538;98539;98540;98541;108142;108143;108144;108145;108146;108147;108148;108149;108150;108151;108152;108153;108154;108155;108156;108157;108158;108159;108160;108161;108162;174938;17493…	9927;9928;9929;26876;35717;35718;52101;52102;52103;52104;52105;52106;52107;52108;52109;52110;70319;70320;70321;70322;70323;70324;70325;70326;70327;70328;70329;70330;70331;77079;77080;77081;77082;77083;77084;77085;77086;77087;77088;77089;77090;77091;77092;77093;77094;77095;77096;77097;77098;77099;124678;124679;124680;124681;124682;124683;124684;124685;124686;124687;124688;124689;124690;124691;1246…	9927;26876;35717;52104;70319;77079;124689;147371;163909;238647;297631;297635;307630;311682;311689;410838	2577	33
Q61553;F7BDR1;D3Z1X1;D3YWW3;D3YZR7	Q61553	Fascin	Fscn1	37	37	37	82.8	163960000000	20052000000	21021000000	20864000000	11717000000	5255000000	25755000000	13331000000	17219000000	4643100000	24102000000	22739000000	24215000000	22906000000	19837000000	18272000000	25289000000	24380000000	25454000000	18015000000	23840000000	463;5393;5802;7755;11589;13080;14416;14700;14701;25318;27542;28299;30316;30317;30801;32274;32472;34203;34204;34431;37072;37073;37094;39906;40603;44585;45836;46883;47952;47953;47973;48126;48834;49010;49448;49629;49630	True;True;True;True;True;True;True;True;True;True;True;True;True;True;True;True;True;True;True;True;True;True;True;True;True;True;True;True;True;True;True;True;True;True;True;True;True	505;5915;6369;8505;12701;14321;15822;16143;16144;27847;30317;31135;33967;33968;34500;34501;36150;36362;38279;38280;38530;41368;41369;41391;44481;45262;49689;51106;52243;53404;53405;53425;53587;54365;54554;55044;55238;55239	4990;4991;4992;4993;4994;4995;4996;4997;4998;4999;61679;61680;61681;61682;61683;61684;61685;61686;61687;61688;61689;66247;66248;66249;66250;66251;66252;88986;88987;88988;88989;88990;88991;88992;88993;88994;88995;88996;88997;88998;88999;89000;89001;89002;131785;131786;131787;131788;149494;149495;149496;149497;149498;149499;149500;149501;149502;149503;149504;149505;149506;149507;149508;149509;14951…	3557;3558;3559;3560;3561;3562;3563;3564;43292;43293;43294;43295;43296;43297;43298;46682;46683;46684;46685;46686;63527;63528;63529;63530;63531;63532;63533;63534;63535;63536;63537;63538;63539;93330;105874;105875;105876;105877;105878;105879;105880;105881;105882;105883;105884;105885;105886;105887;105888;105889;105890;105891;105892;105893;117494;117495;117496;120076;120077;120078;120079;120080;120081;…	3562;43296;46686;63529;93330;105875;117495;120084;120095;213879;231999;237777;256317;256324;260044;273340;274862;288530;288532;290185;309813;309818;309942;331025;336895;372572;383053;391351;399918;399925;400104;401086;407193;408492;412219;413588;413610	3775	378
P63242;Q8BGY2	P63242	Eukaryotic translation initiation factor 5A-1	Eif5a	12	12	12	85.1	161160000000	24756000000	20007000000	21602000000	8064800000	7455900000	24191000000	12984000000	13764000000	6144900000	22189000000	24717000000	25617000000	24784000000	15140000000	19447000000	25836000000	17926000000	17879000000	18850000000	20840000000	569;570;8491;21973;22932;30421;30749;36509;36510;44786;48233;48336	True;True;True;True;True;True;True;True;True;True;True;True	623;624;625;626;9312;24223;24224;25246;25247;34081;34443;40764;40765;49907;53710;53830;53831	6159;6160;6161;6162;6163;6164;6165;6166;6167;6168;6169;6170;6171;6172;6173;6174;6175;6176;6177;6178;6179;6180;6181;6182;6183;6184;6185;6186;6187;6188;6189;6190;6191;6192;6193;6194;97560;97561;97562;97563;97564;97565;97566;97567;97568;97569;97570;97571;97572;97573;97574;97575;97576;97577;97578;97579;262805;262806;262807;262808;262809;262810;262811;262812;262813;262814;262815;275008;275009;275010;2…	4414;4415;4416;4417;4418;4419;4420;4421;4422;4423;4424;4425;4426;4427;4428;4429;4430;4431;4432;4433;4434;4435;4436;4437;4438;4439;4440;4441;69657;69658;69659;69660;69661;69662;69663;69664;69665;69666;69667;69668;69669;69670;69671;69672;69673;69674;69675;69676;69677;69678;69679;69680;69681;69682;186973;186974;186975;186976;186977;186978;186979;194892;194893;194894;194895;194896;194897;194898;19489…	4415;4436;69671;186976;194894;257020;259628;305489;305497;374442;402058;402954	2926;2927;2928	20;43;79
[truncated: 4,299 more rows]
